# Supplementary material for: Role of hydrazone substituents in determining the nuclearity and antibacterial activity of Zn(ii) complexes with pyrazolone-based hydrazones
Source: Royal Society of Chemistry journal article supplement (doi:10.1039/d2dt02430f), 2022-01-01
Supplement: d2dt02430f1.pdf [file d2dt02430f1.pdf]

## Supporting Information

### Role of hydrazone substituents in determining the nuclearity and antibacterial activity of Zn(II) complexes with pyrazolone-based hydrazones

Fabio Marchetti,<sup>\*a</sup> Riccardo Pettinari,<sup>b</sup> Federico Verdicchio,<sup>b</sup> Alessia Tombesi,<sup>b</sup> Stefania Scuri,<sup>b</sup> Sonila Xhafa,<sup>a</sup> Laura Olivieri,<sup>a</sup> Claudio Pettinari,<sup>b</sup> Duane Choquesillo-Lazarte,<sup>c</sup> Amalia García-García,<sup>d</sup> Antonio Rodríguez-Diéguez,<sup>d</sup> Agustín Galindo<sup>e</sup>

<sup>a</sup> *ChIP Research Center, School of Science and Technology, University of Camerino, via Madonna delle Carceri, 62032 Camerino MC, Italy.*

<sup>b</sup> *ChIP Research Center, School of Pharmacy, University of Camerino, via Madonna delle Carceri, 62032 Camerino MC, Italy.*

<sup>c</sup> *Laboratorio de Estudios Cristalográficos, IACT, CSIC-UGR, Av. Las Palmeras nº4, 18100 Granada, Spain.*

<sup>d</sup> *Department of Inorganic Chemistry, Faculty of Sciences, University of Granada, Av. Fuentenueva S/N, 18071 Granada, Spain.*

<sup>e</sup> *Departamento de Química Inorgánica, Facultad de Química, Universidad de Sevilla, Apto 1203, 41071 Sevilla, Spain.*

#### Table of contents

|                                                                                                                                                                |            |
|----------------------------------------------------------------------------------------------------------------------------------------------------------------|------------|
| <b>Figures S1-S7:</b> NMR spectra of $H_2L^2$ .....                                                                                                            | Pag. 3-6   |
| <b>Figures S8-S14:</b> NMR spectra of $H_2L^4$ .....                                                                                                           | Pag. 6-9   |
| <b>Figures S15-S20:</b> NMR spectra of $H_2L^5$ .....                                                                                                          | Pag. 10-12 |
| <b>Figures S21-S23:</b> NMR spectra of $[Zn(HL^1)_2]$ ( <b>1</b> ) .....                                                                                       | Pag. 13-14 |
| <b>Figures S24-S27:</b> NMR spectra of $[Zn(HL^2)_2]$ ( <b>2</b> ) .....                                                                                       | Pag. 14-16 |
| <b>Figures S28-S33:</b> NMR spectra of $[Zn(HL^3)_2(H_2O)_2]$ ( <b>3</b> ) .....                                                                               | Pag. 16-19 |
| <b>Figures S34-S37:</b> NMR spectra of $[Zn(HL^4)_2]_n$ ( <b>4</b> ) .....                                                                                     | Pag. 19-21 |
| <b>Figures S38-S45:</b> NMR spectra of $[Zn(HL^5)_2(H_2O)_2]$ ( <b>5</b> ) .....                                                                               | Pag. 21-25 |
| <b>Figure S46:</b> Stability study of $[Zn(HL^2)_2]$ ( <b>2</b> ) in DMSO- $d_6$ .....                                                                         | Pag. 25    |
| <b>Figure S47:</b> comparison IR spectra of $[Zn(HL^3)_2(H_2O)_2]$ ( <b>3</b> ) and $[Zn(HL^4)_2]_n$ ( <b>4</b> ) .....                                        | Pag. 26    |
| <b>Table S1:</b> X-ray crystallographic data of $H_2L^2$ and $H_2L^4$ .....                                                                                    | Pag. 27    |
| <b>Table S2:</b> X-ray crystallographic data of $[Zn(HL^1)_2]$ ( <b>1</b> ), $[Zn(HL^2)_2]$ ( <b>2</b> ) and $[Zn(HL^4)_2]_n$ ( <b>4</b> ) ..                  | Pag. 27    |
| <b>Table S3:</b> Energies (Hartree) and relative energy differences (kcal/mol) for the tautomers I and II of proligands $H_2L^2$ , $H_2L^4$ and $H_2L^5$ ..... | Pag. 28    |
| <b>Figure S48:</b> Comparison of calcd. and exp $^1H$ , $^{13}C$ and $^{15}N$ NMR spectra of $H_2L^5$ .....                                                    | Pag. 29    |
| <b>Figure S49:</b> Comparison of selected bond distances of $H_2L^2$ and $H_2L^4$ .....                                                                        | Pag. 30    |
| <b>Figure S50:</b> Comparison of exp. and calcd. IR spectrum of $H_2L^5$ .....                                                                                 | Pag. 31    |
| <b>Table S4:</b> Selected stretching assignments of the IR spectrum of $H_2L^5$ .....                                                                          | Pag. 31    |
| <b>Figure S51:</b> MOs of anionic ligands $[HL^1]^-$ , $[HL^2]^-$ and $[HL^4]^-$ , .....                                                                       | Pag. 32-34 |
| <b>Figure S52:</b> Optimized structures of complexes <b>1</b> and <b>2</b> .....                                                                               | Pag. 35    |

|                                                                                                                              |            |
|------------------------------------------------------------------------------------------------------------------------------|------------|
| <b>Table S5:</b> Comparison of exp. and calcd. structural parameters of <b>1</b> and <b>2</b> .....                          | Pag. 36    |
| <b>Figure S53:</b> Comparison of calcd. and exp. $^1\text{H}$ and $^{13}\text{C}$ NMR spectra of <b>3</b> and <b>5</b> ..... | Pag. 37    |
| <b>Table S6:</b> Comparison of exp. and calcd. structural parameters of <b>4</b> .....                                       | Pag. 38    |
| <b>Table S7:</b> Coordinates of the optimized compounds.....                                                                 | Pag. 39-71 |

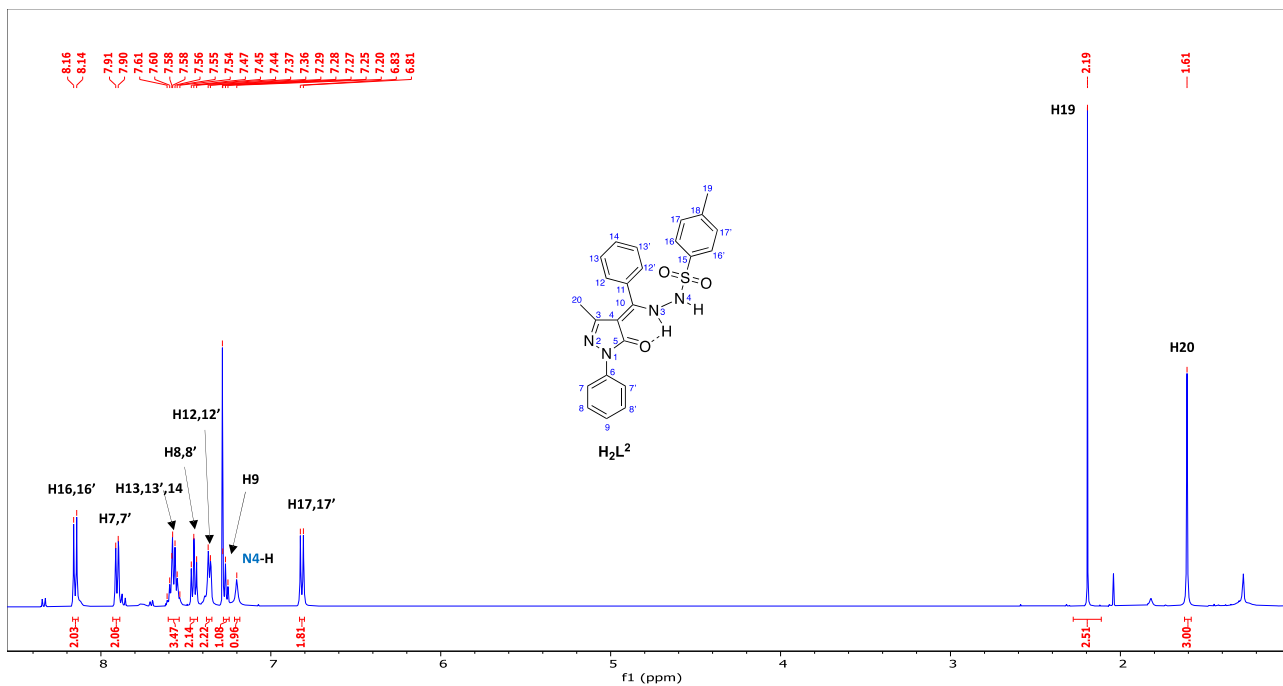

Figure S1.  $^1H$  NMR  $H_2L^2$  in  $CDCl_3$  at 298 K.

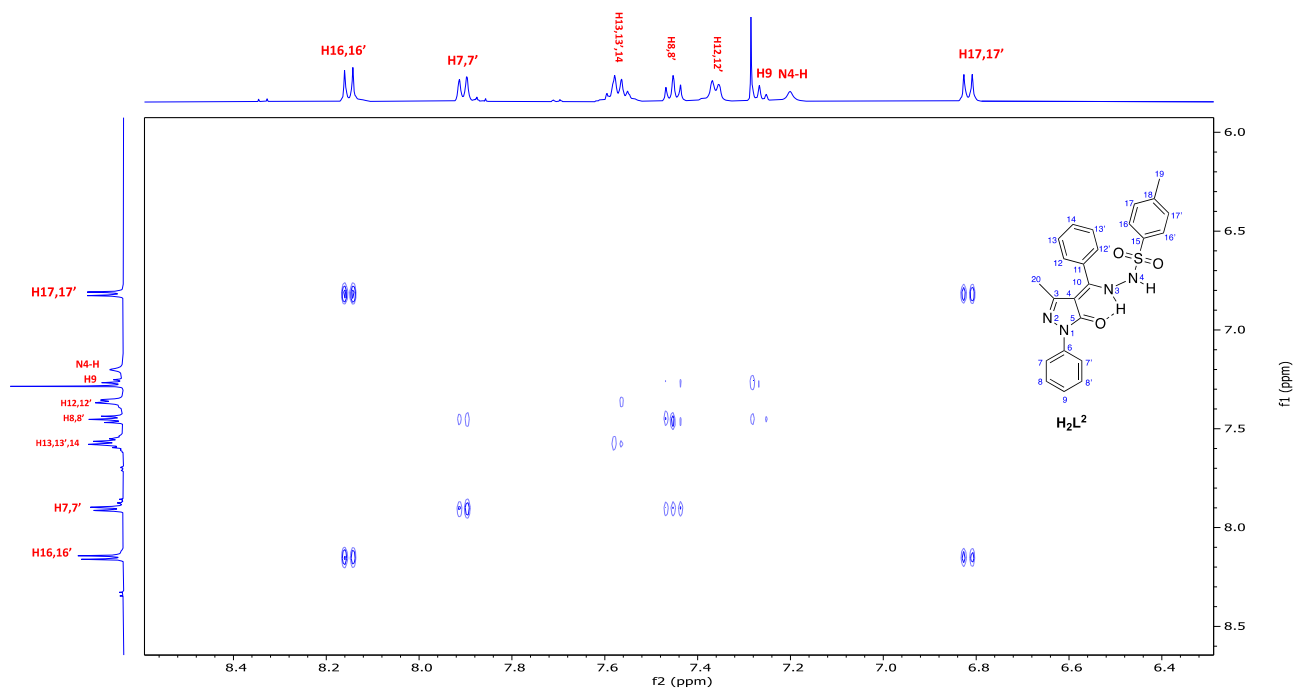

Figure S2.  $\{^1H,^1H\}$ -COSY  $H_2L^2$  in  $CDCl_3$  at 298 K.

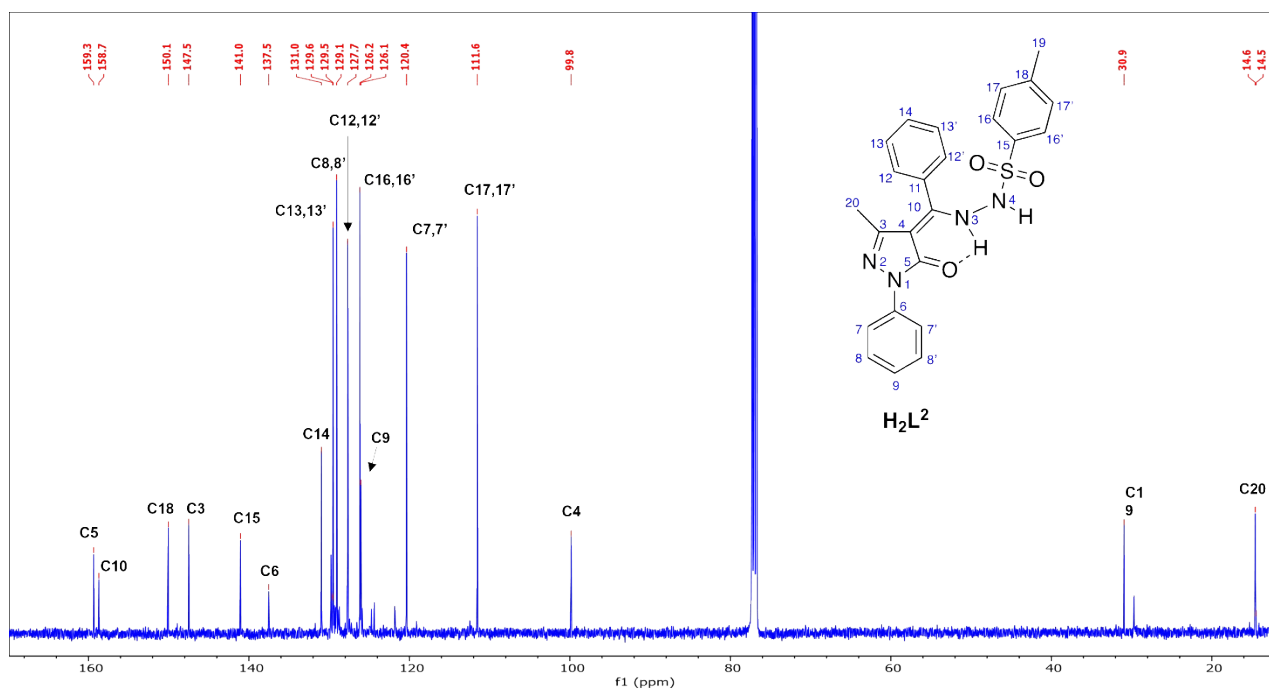

Figure S3.  $^{13}\text{C}\{^1\text{H}\}$  NMR  $\text{H}_2\text{L}^2$  in  $\text{CDCl}_3$  at 298 K.

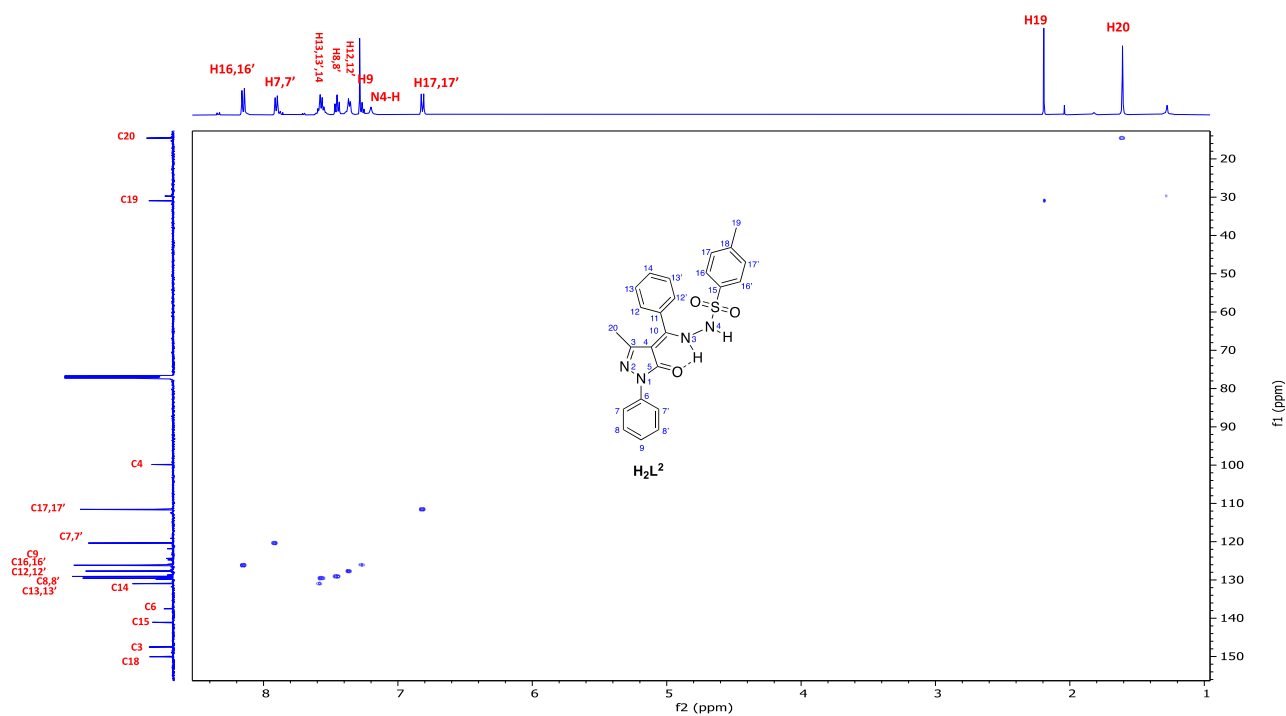

Figure S4.  $\{^1\text{H}, ^{13}\text{C}\}$ -HSQC  $\text{H}_2\text{L}^2$  in  $\text{CDCl}_3$  at 298 K.

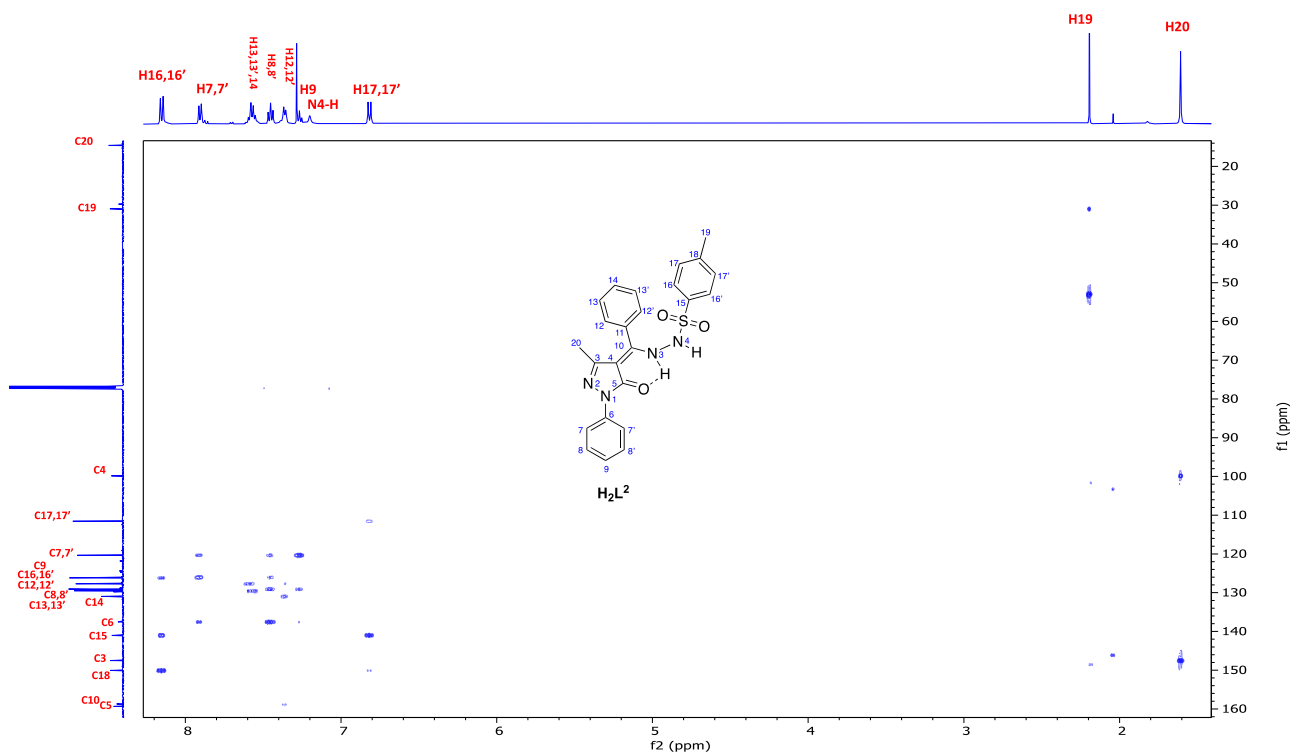

Figure S5.  $\{^1\text{H}, ^{13}\text{C}\}$ -HMBC  $\text{H}_2\text{L}^2$  in  $\text{CDCl}_3$  at 298 K.

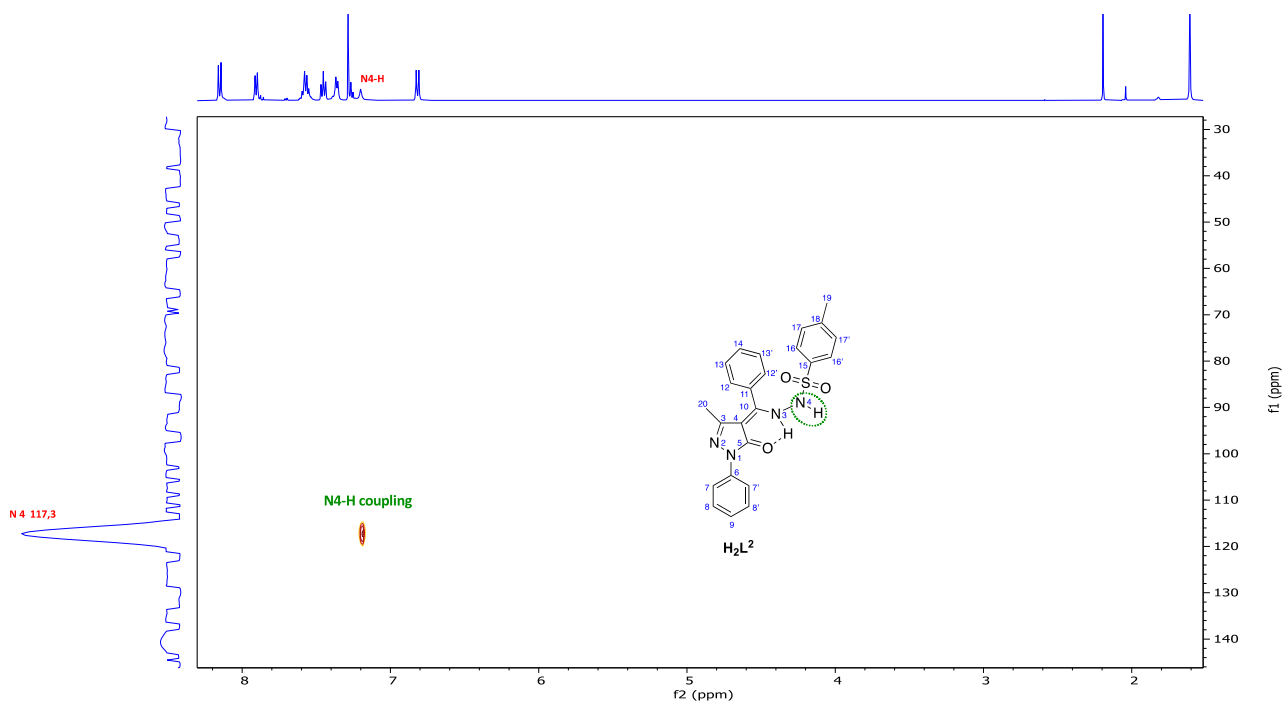

Figure S6.  $\{^1\text{H}, ^{15}\text{N}\}$ -HSQC  $\text{H}_2\text{L}^2$  in  $\text{CDCl}_3$  at 298 K.

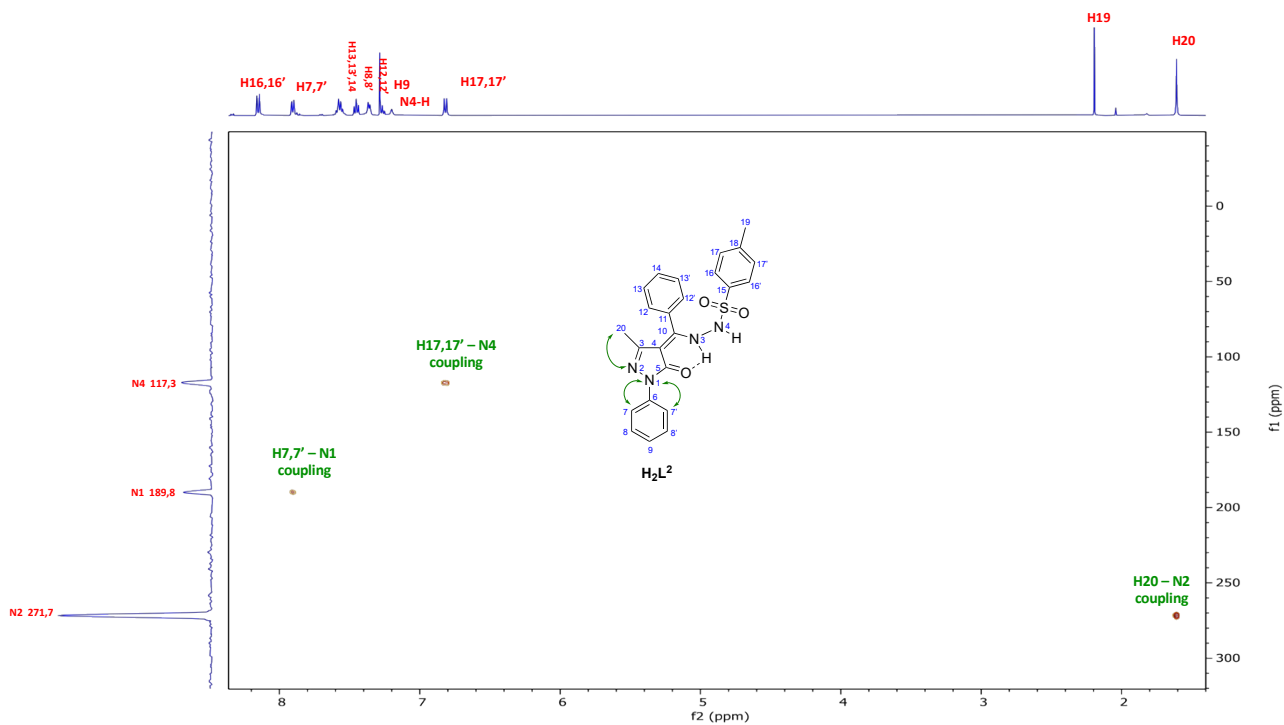

Figure S7.  $\{^1\text{H}, ^{15}\text{N}\}$ -HMBC  $\text{H}_2\text{L}^2$  in  $\text{CDCl}_3$  at 298 K.

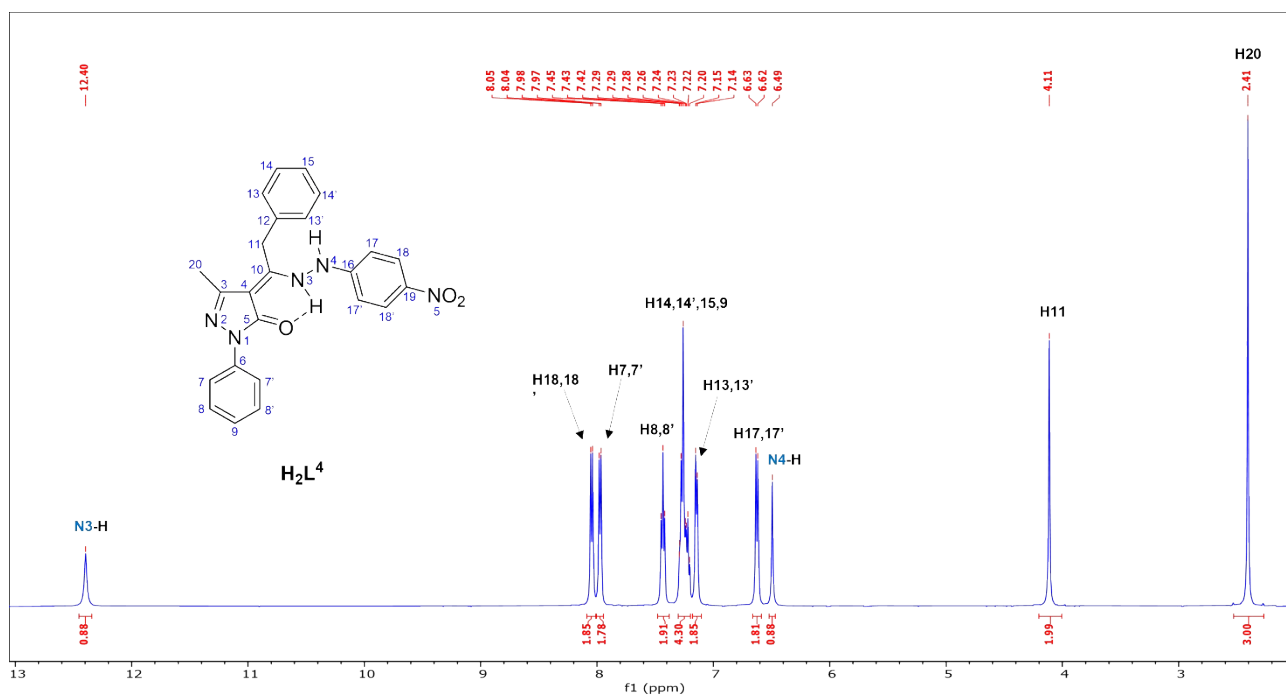

Figure S8.  $^1\text{H}$  NMR  $\text{H}_2\text{L}^4$  in  $\text{CDCl}_3$  at 298 K.

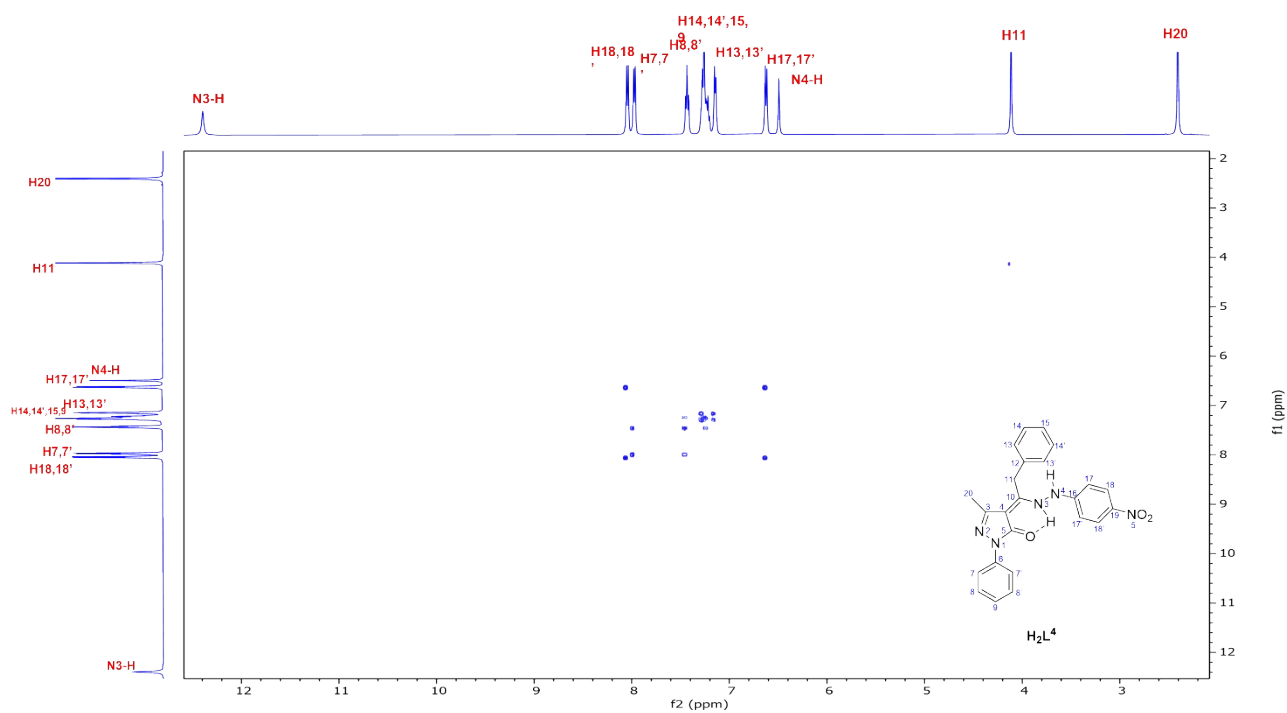

Figure S9.  $\{^1\text{H},^1\text{H}\}$ -COSY  $\text{H}_2\text{L}^4$  in  $\text{CDCl}_3$  at 298 K.

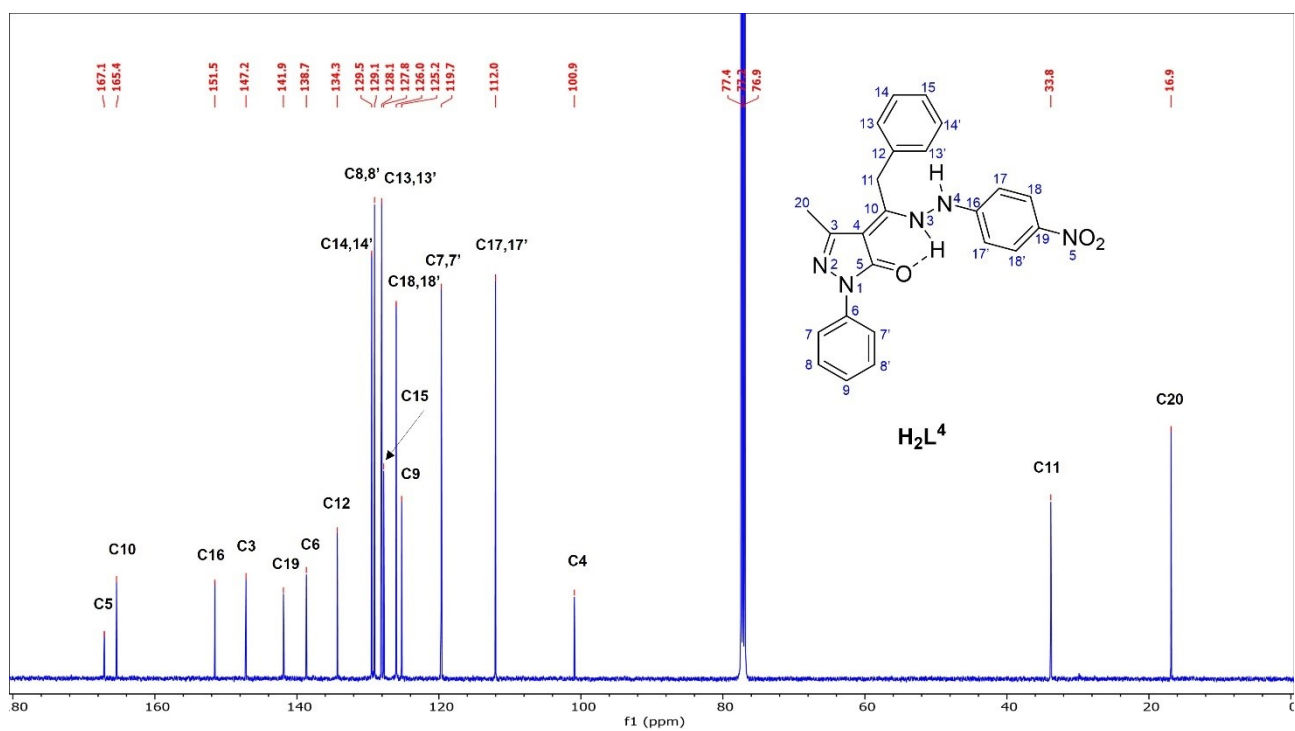

Figure S10.  $^{13}\text{C}\{^1\text{H}\}$  NMR  $\text{H}_2\text{L}^4$  in  $\text{CDCl}_3$  at 298 K.

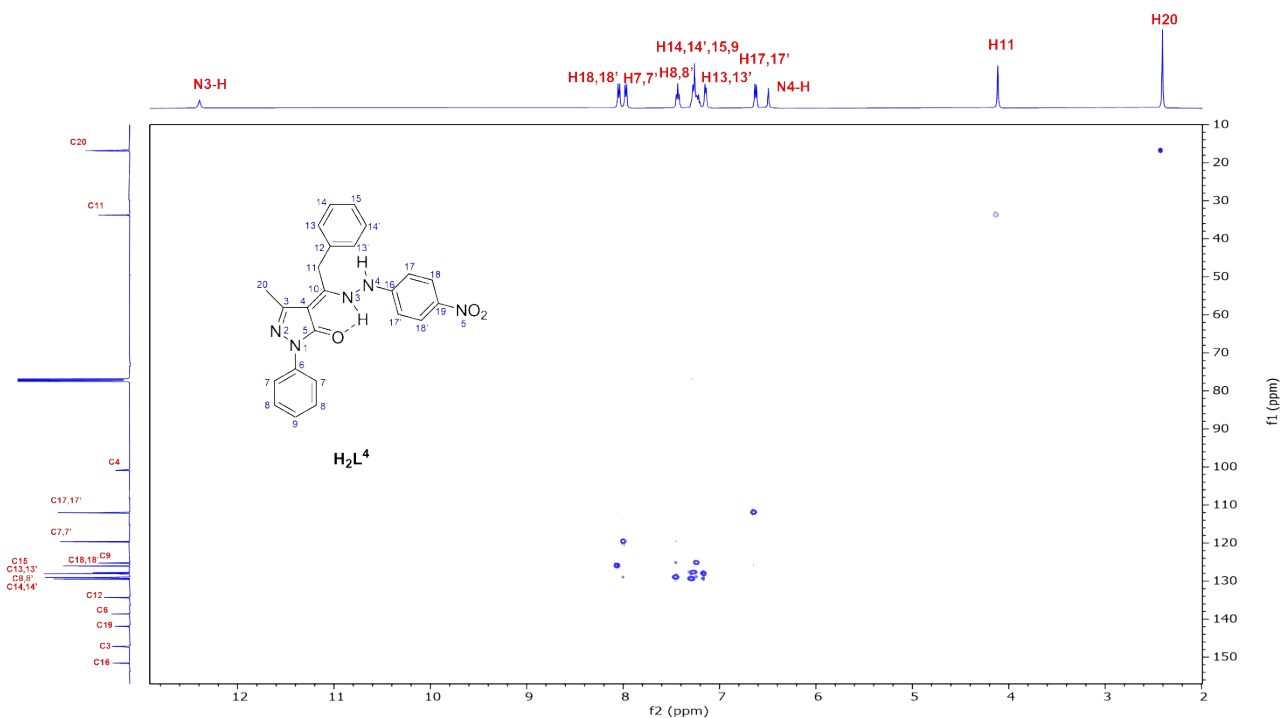

Figure S11.  $\{^1\text{H}, ^{13}\text{C}\}$ -HSQC  $\text{H}_2\text{L}^4$  in  $\text{CDCl}_3$  at 298 K.

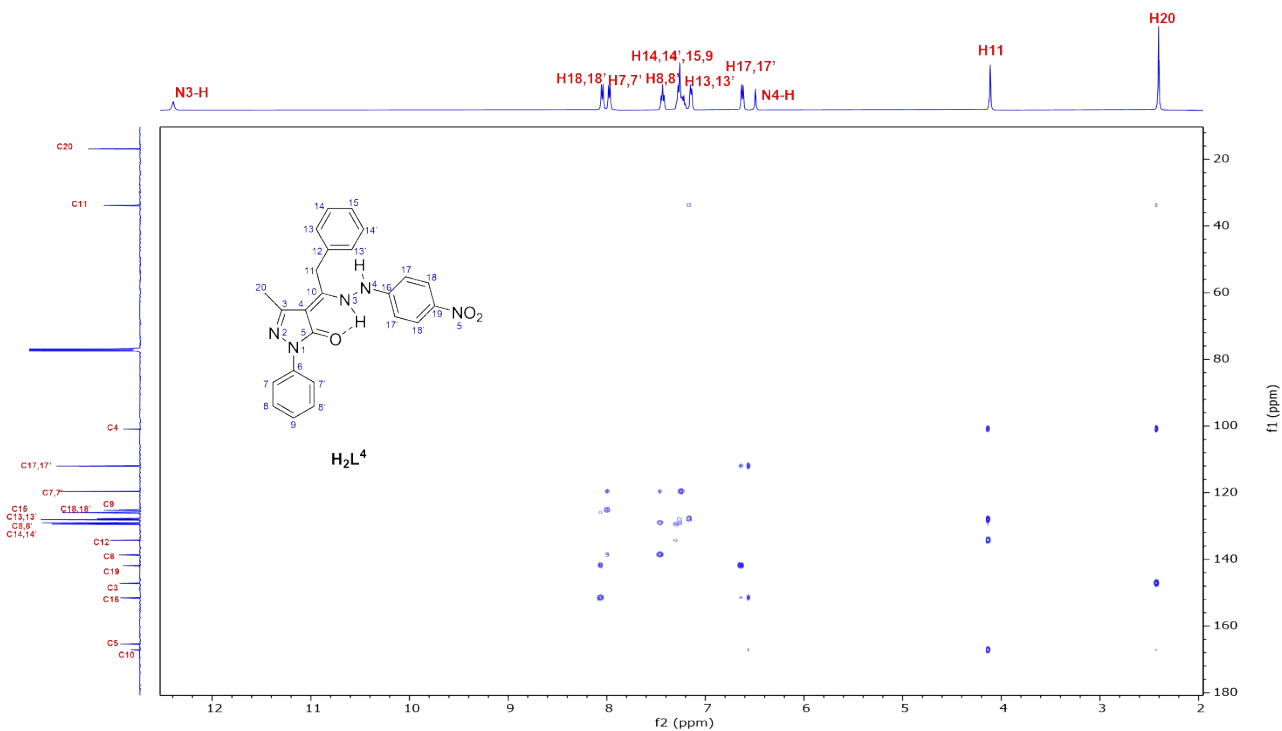

Figure S12.  $\{^1\text{H}, ^{13}\text{C}\}$ -HMBC  $\text{H}_2\text{L}^4$  in  $\text{CDCl}_3$  at 298 K.



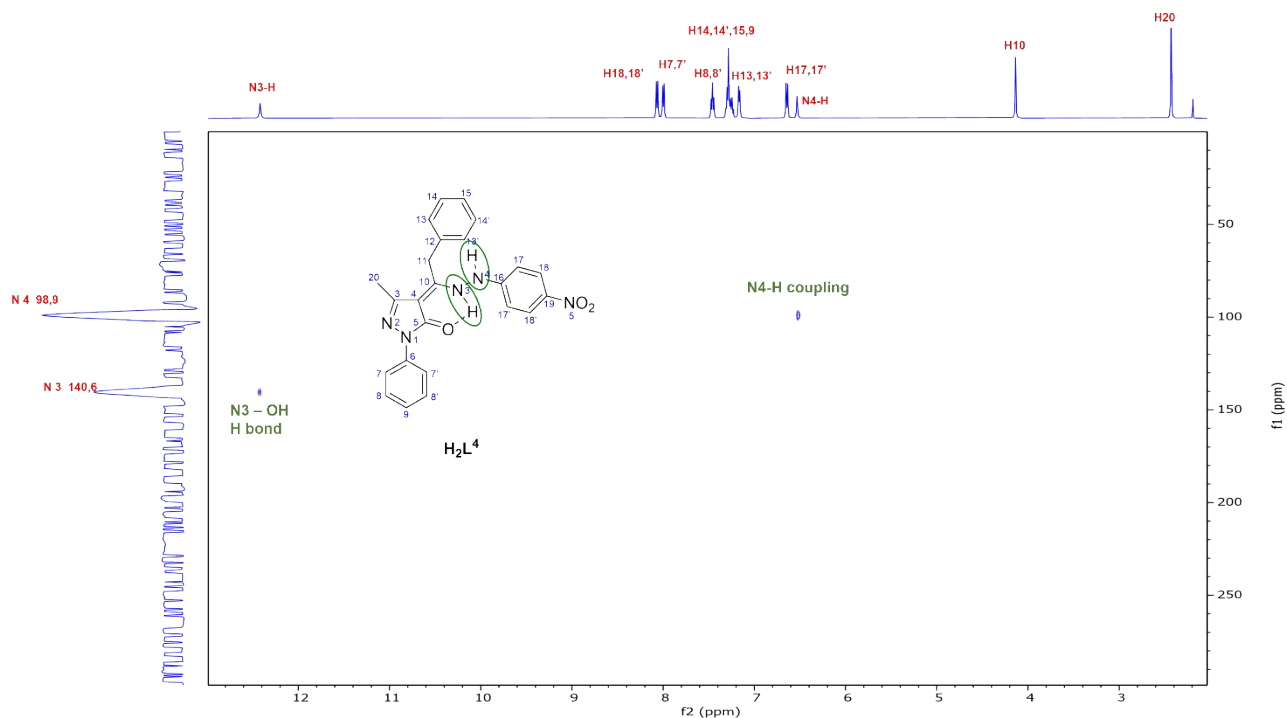

Figure S13.  $\{^1\text{H}-^{15}\text{N}\}$ -HSQC  $\text{H}_2\text{L}^4$  in  $\text{CDCl}_3$  at 298 K.

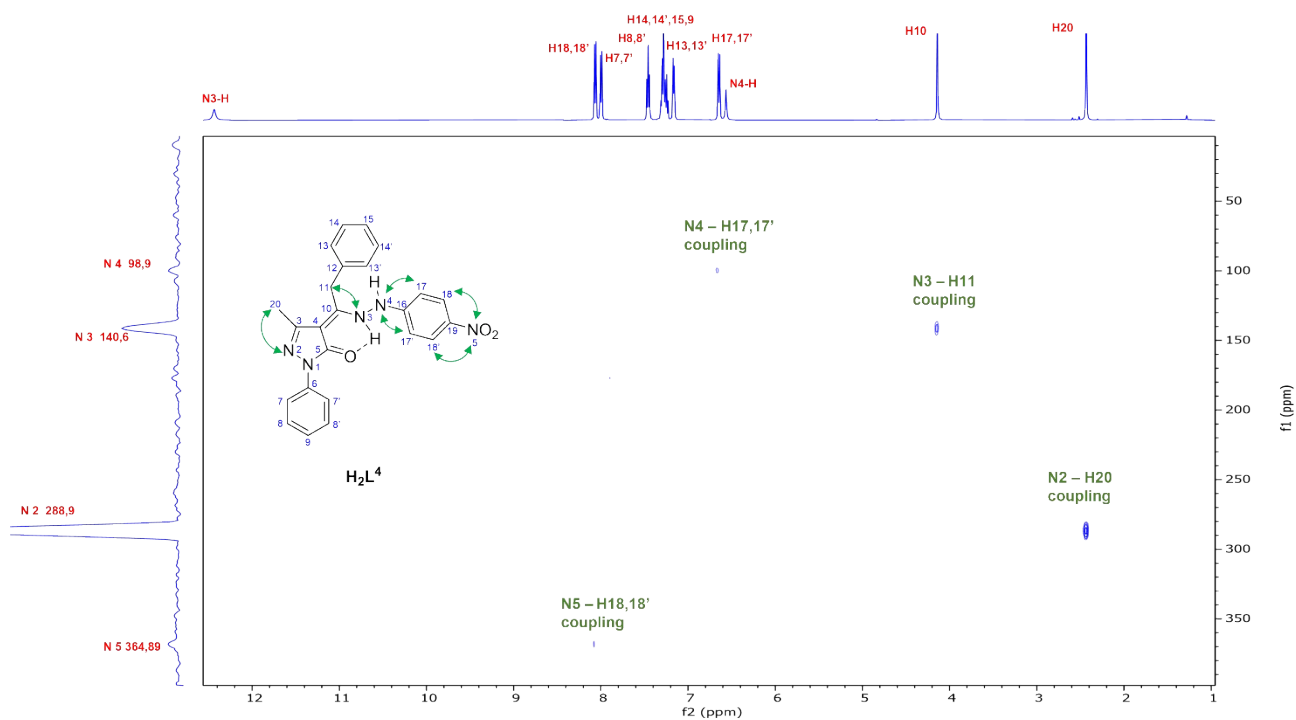

Figure S14.  $\{^1\text{H}, ^{15}\text{N}\}$ -HMBC  $\text{H}_2\text{L}^4$  in  $\text{CDCl}_3$  at 298 K.

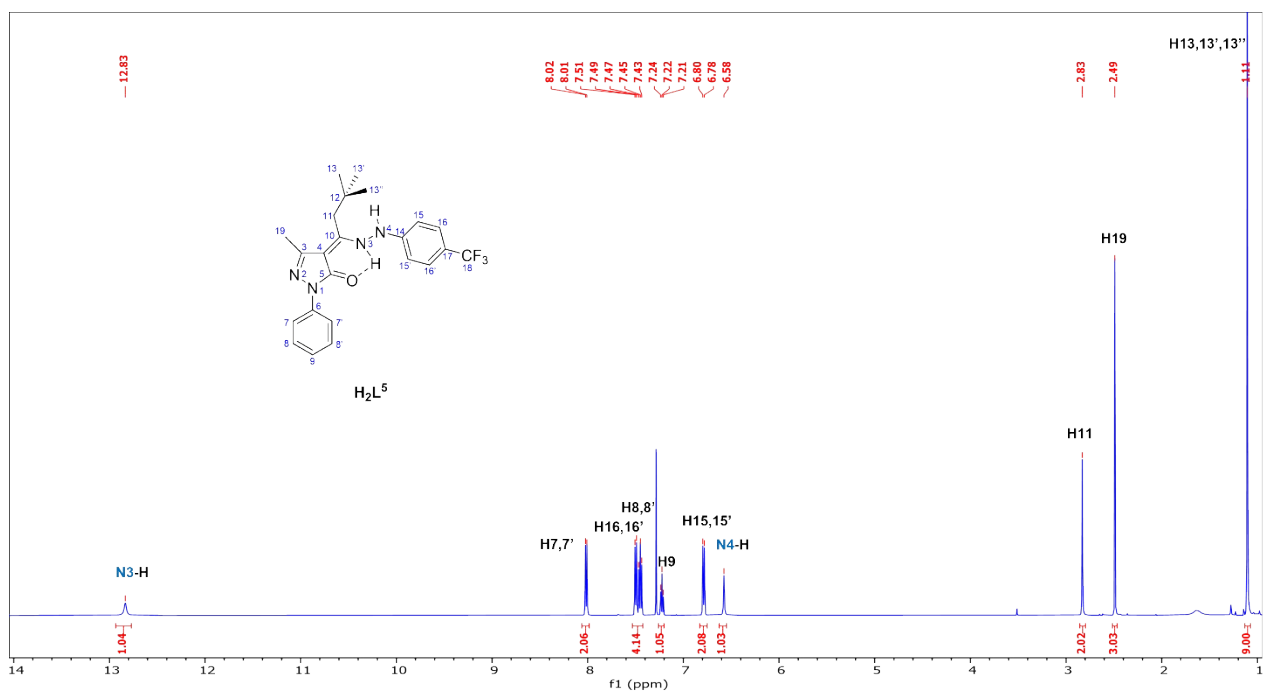

**Figure S15.  $^1\text{H}$  NMR  $\text{H}_2\text{L}^5$  in  $\text{CDCl}_3$  at 298 K.**

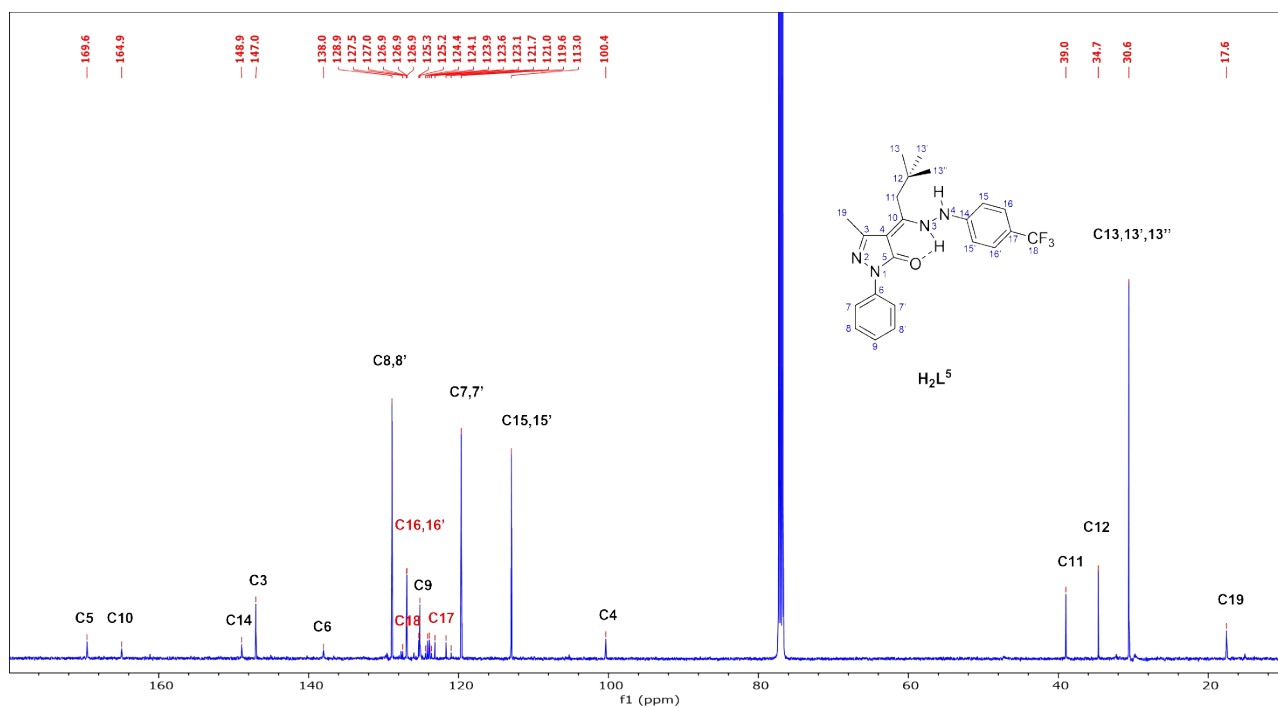

**Figure S16.  $^{13}\text{C}\{^1\text{H}\}$  NMR  $\text{H}_2\text{L}^5$  in  $\text{CDCl}_3$  at 298 K.**

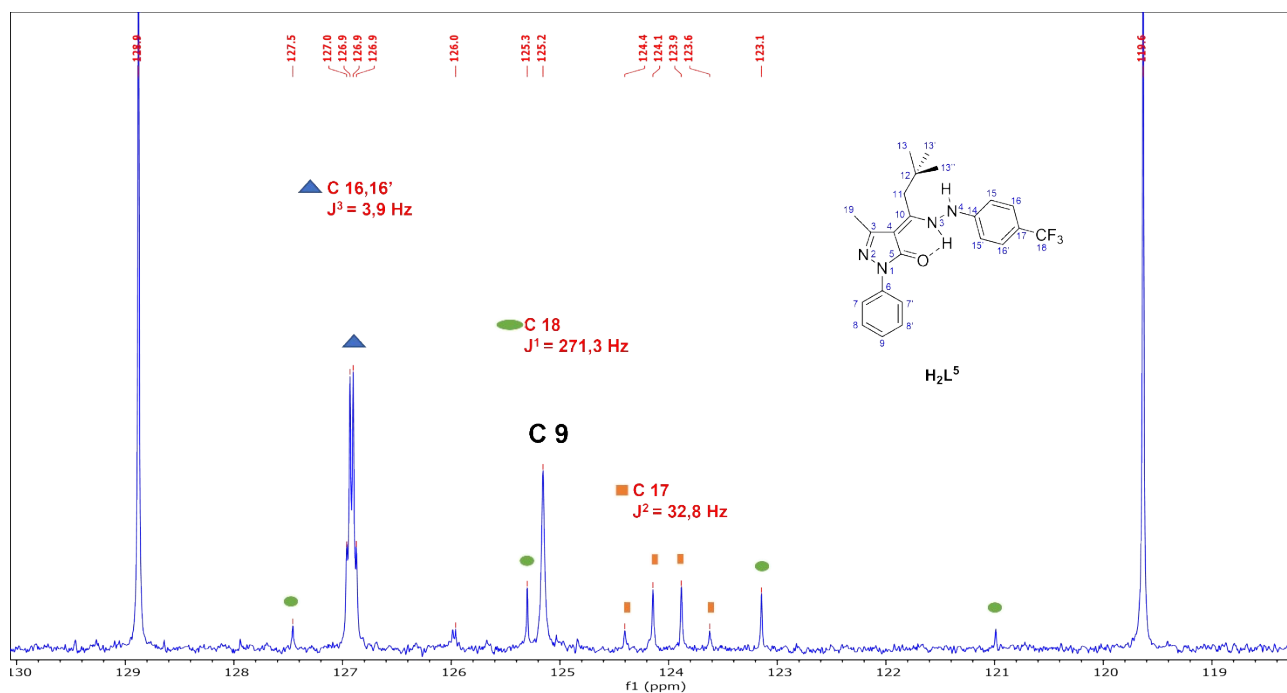

Figure S17. Magnification  $^{13}\text{C}\{^1\text{H}\}$  NMR  $\text{H}_2\text{L}^5$  in  $\text{CDCl}_3$  at 298 K.

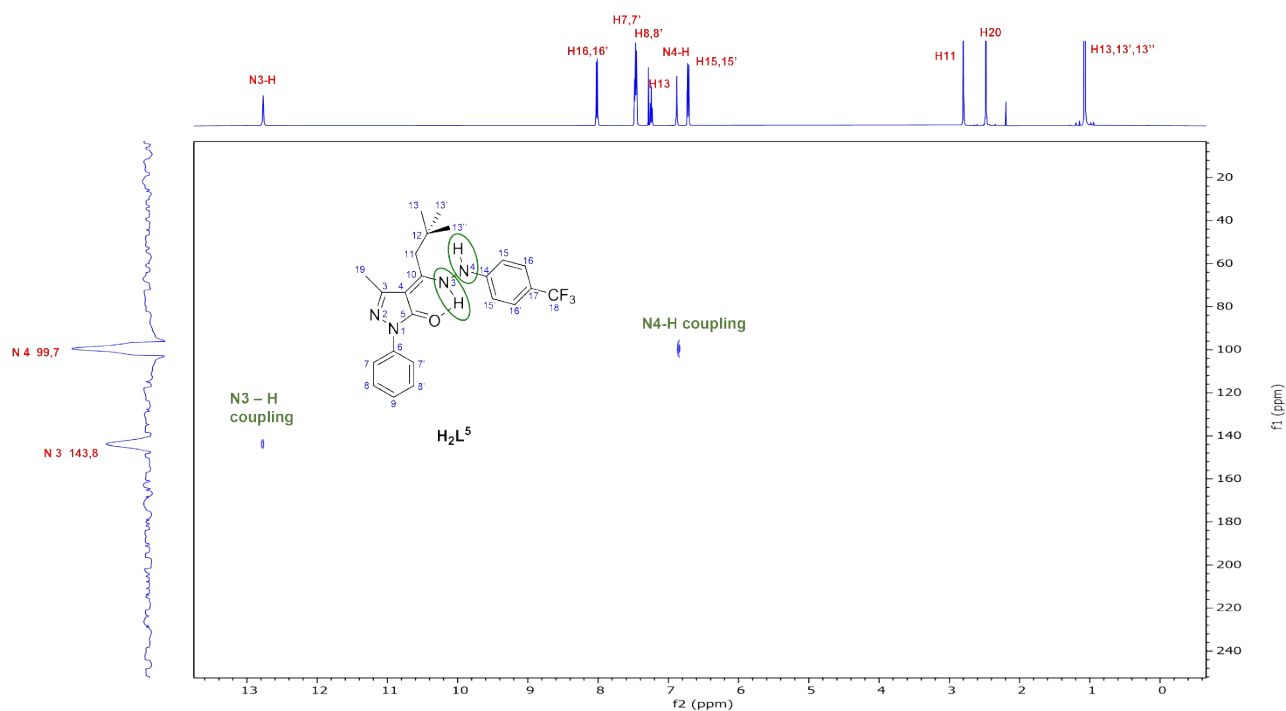

Figure S18.  $\{^1\text{H}, ^{15}\text{N}\}$ -HSQC  $\text{H}_2\text{L}^5$  in  $\text{CDCl}_3$  at 298 K.

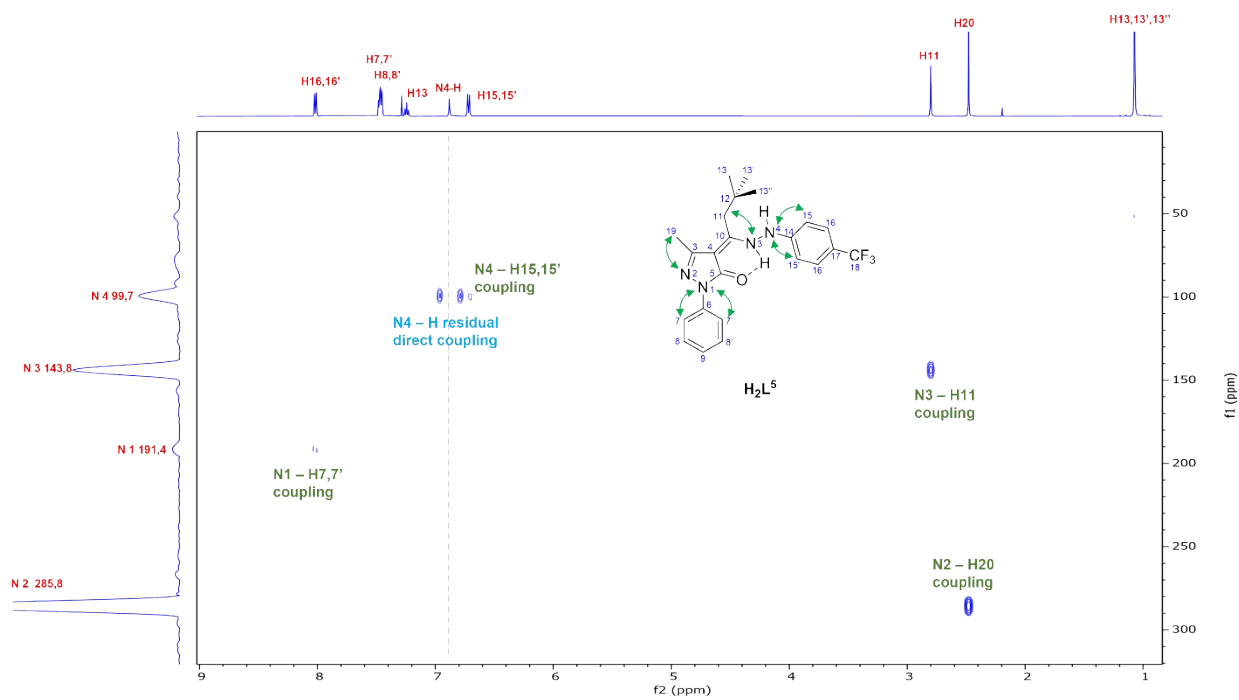

Figure S19.  $\{^1\text{H}, ^{15}\text{N}\}$ -HMBC  $\text{H}_2\text{L}^5$  in  $\text{CDCl}_3$  at 298 K.

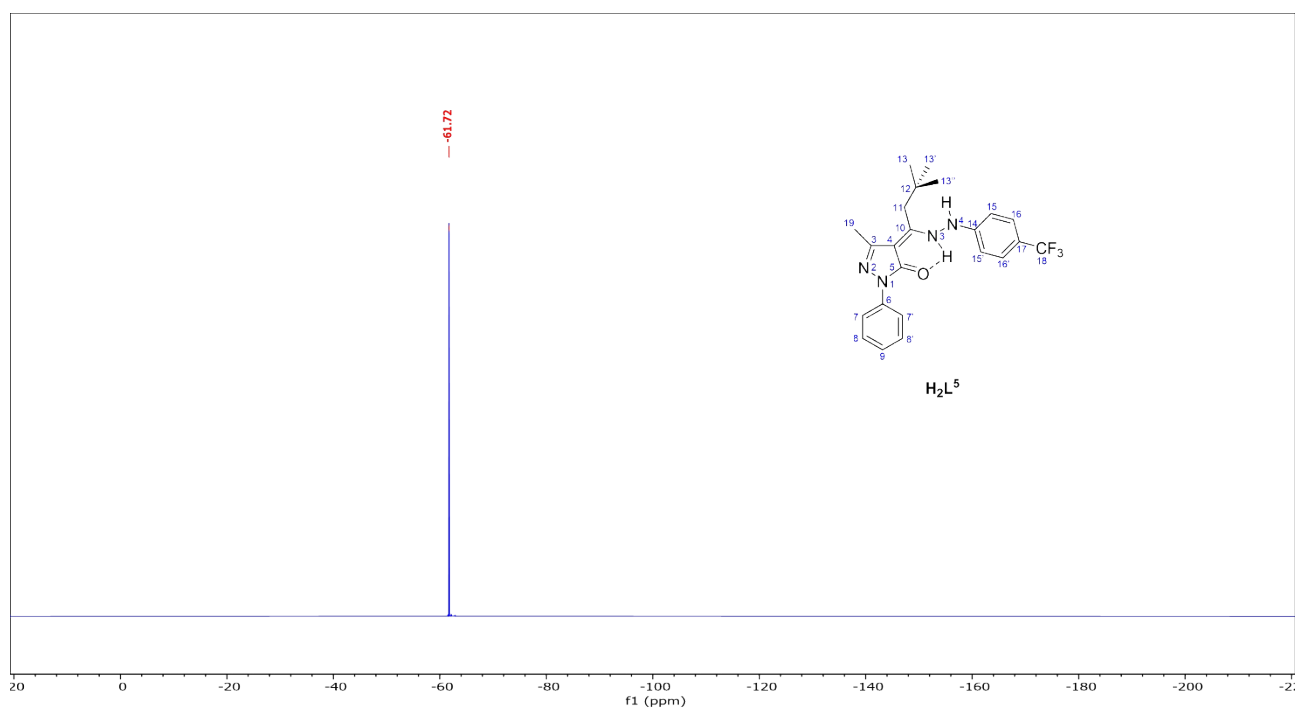

Figure S20.  $^{19}\text{F}\{^1\text{H}\}$  NMR  $\text{H}_2\text{L}^5$  in  $\text{CDCl}_3$  at 298 K.

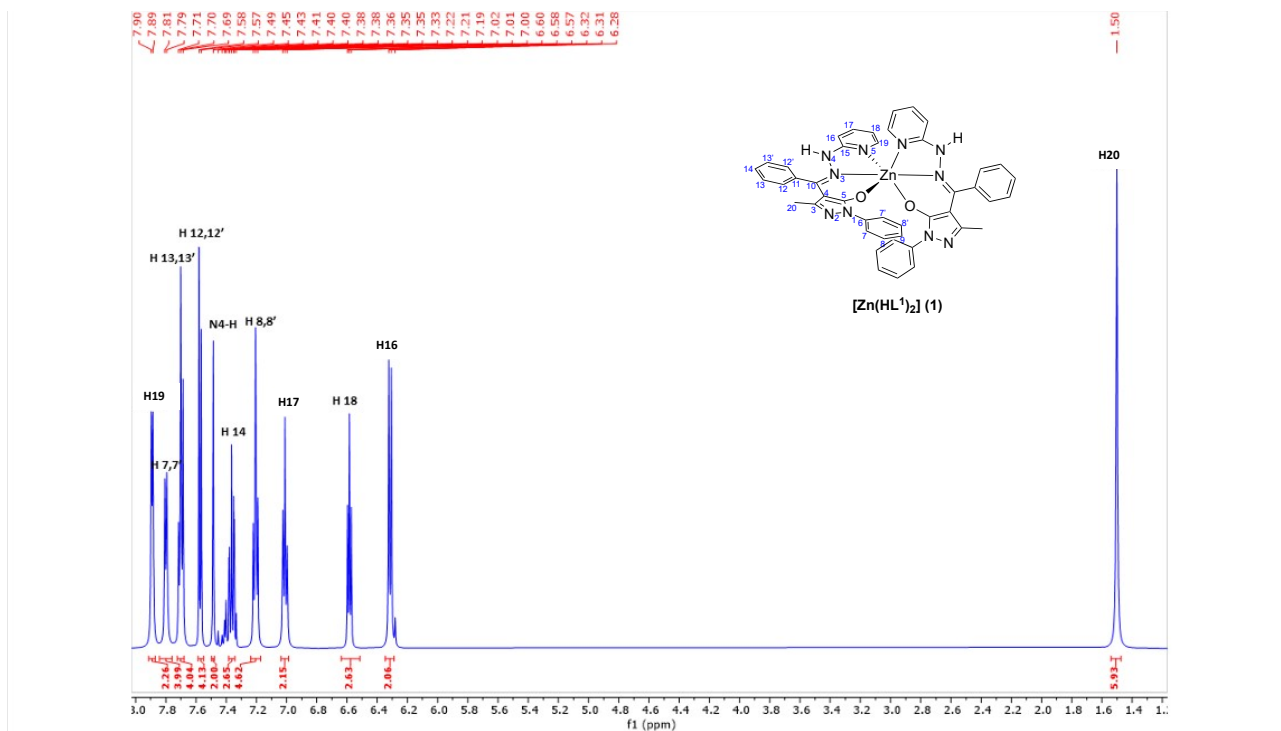

**Figure S21.**  $^1\text{H}$  NMR  $[\text{Zn}(\text{HL}^1)_2]$  (**1**) in  $\text{CDCl}_3$  at 298 K.

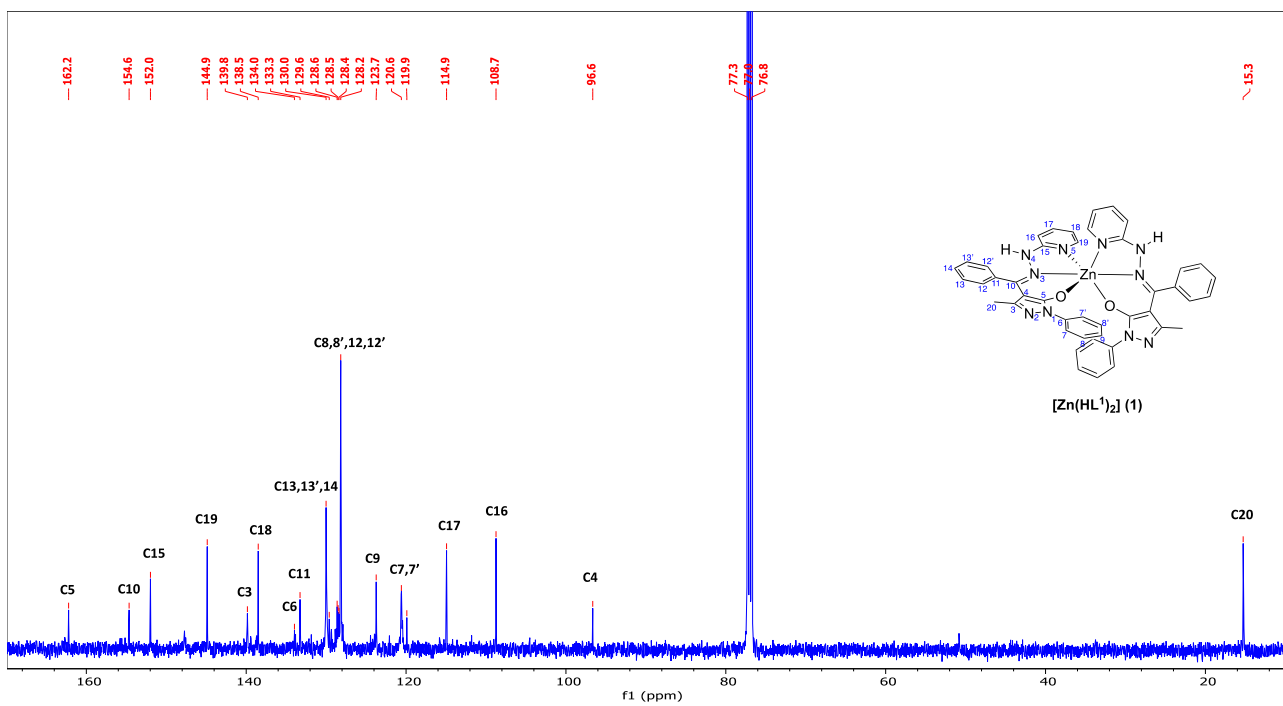

**Figure S22.**  $^{13}\text{C}\{^1\text{H}\}$  NMR  $[\text{Zn}(\text{HL}^1)_2]$  (**1**) in  $\text{CDCl}_3$  at 298 K.

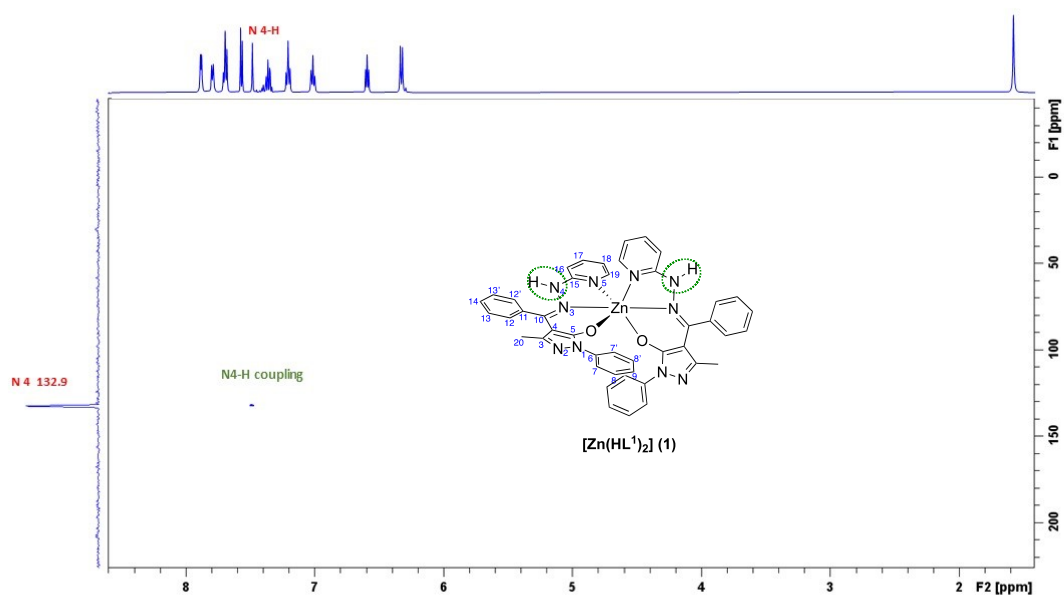

Figure S23.  $\{^1\text{H}, ^{15}\text{N}\}$ -HSQC  $[\text{Zn}(\text{HL}^1)_2]$  (1) in  $\text{CDCl}_3$  at 298 K.

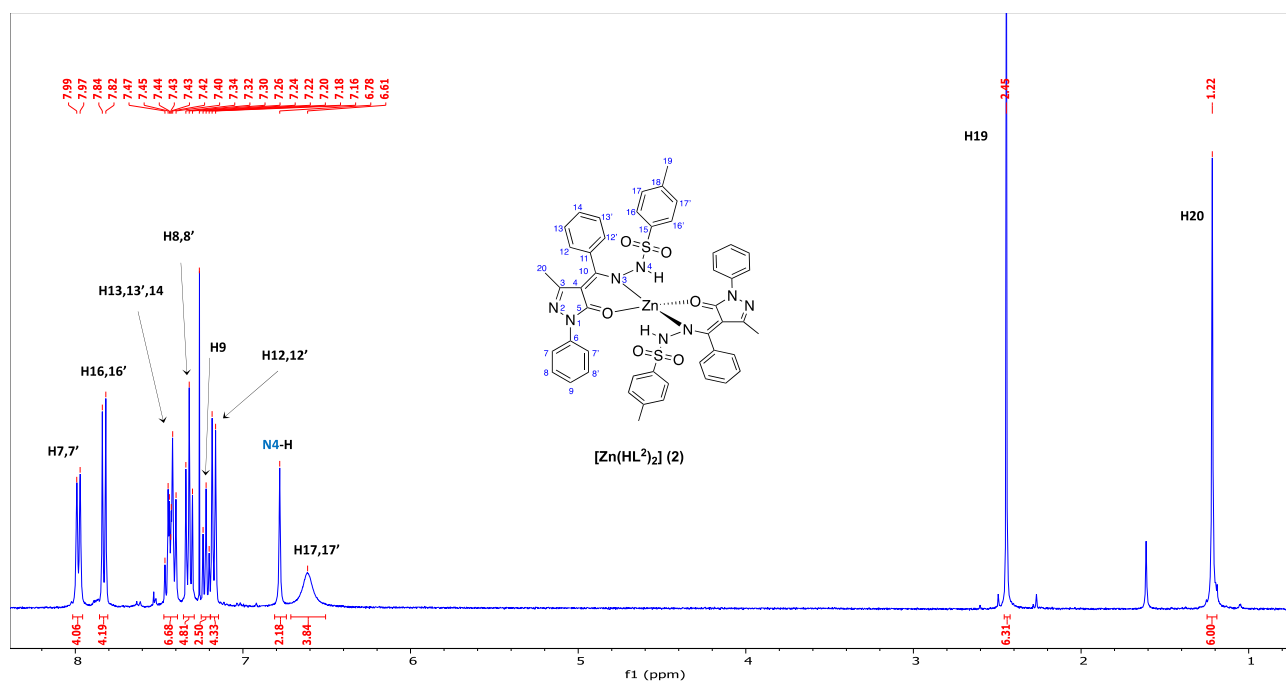

Figure S24.  $^1\text{H}$  NMR  $[\text{Zn}(\text{HL}^2)_2]$  (2) in  $\text{CDCl}_3$  at 298 K.

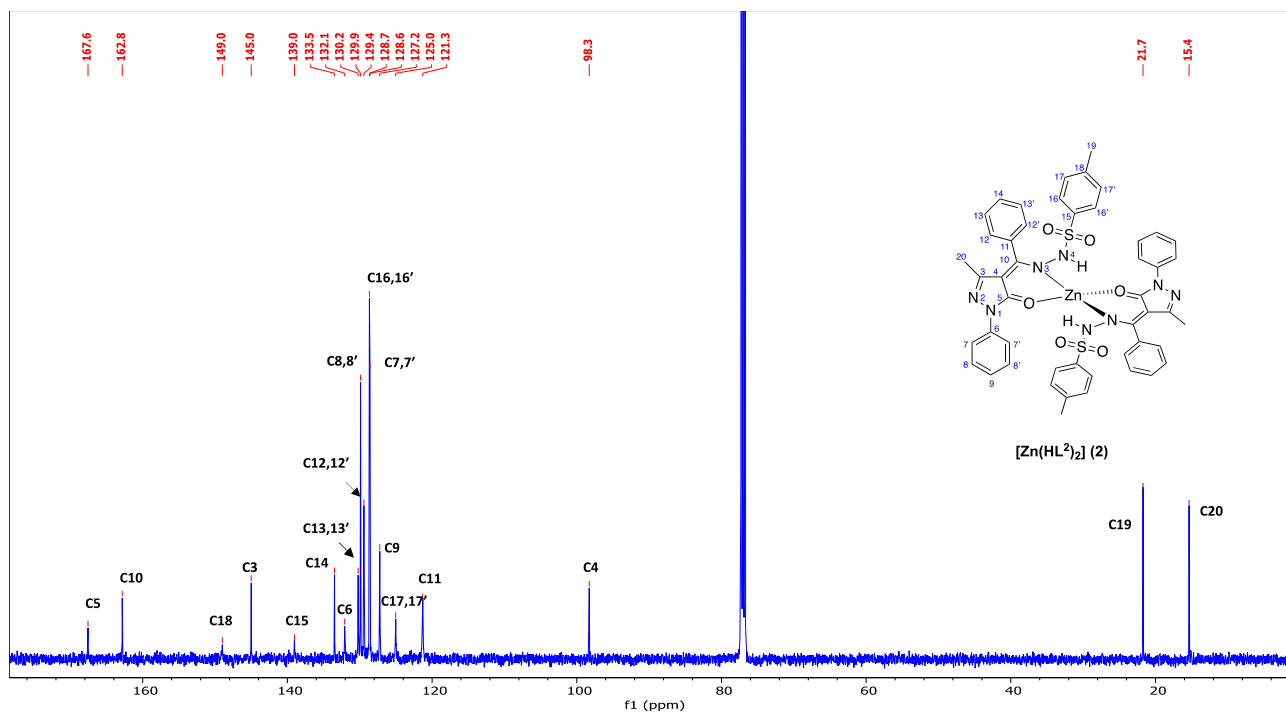

Figure S25.  $^{13}\text{C}\{^1\text{H}\}$  NMR  $[\text{Zn}(\text{HL}^2)_2]$  (**2**) in  $\text{CDCl}_3$  at 298 K.

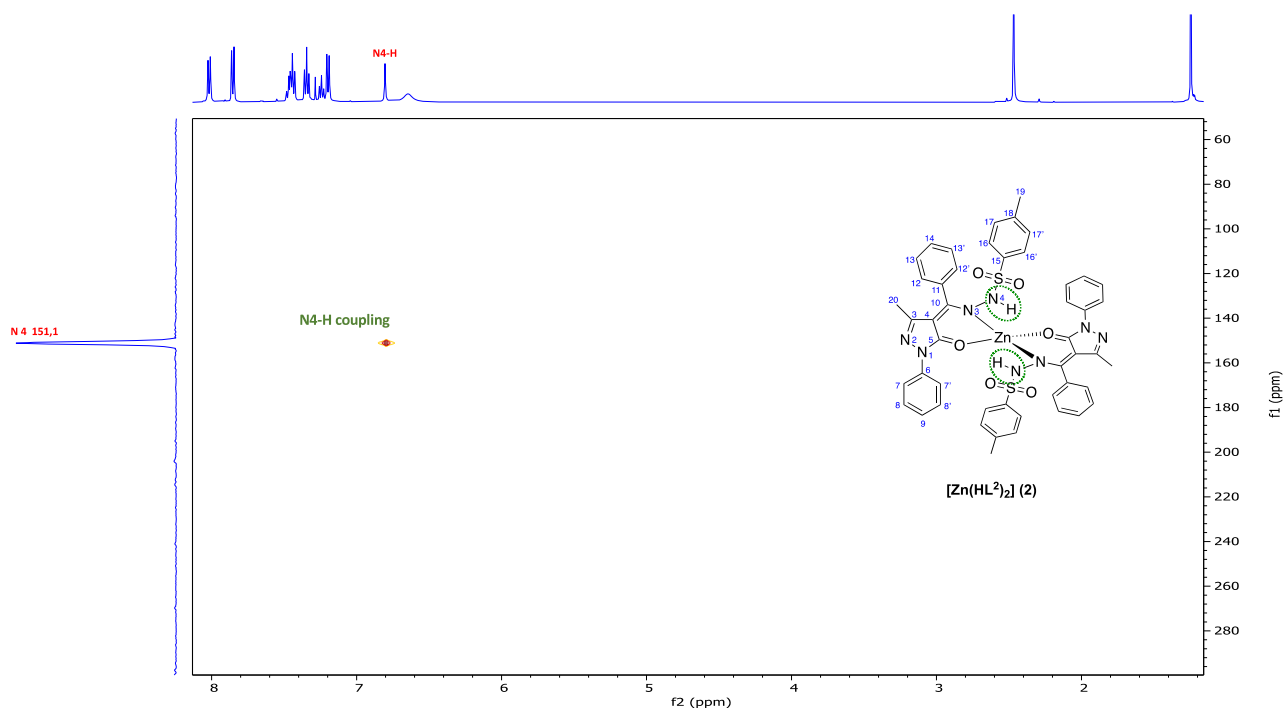

Figure S26.  $\{^1\text{H}, ^{15}\text{N}\}$ -HSQC  $[\text{Zn}(\text{HL}^2)_2]$  (**2**) in  $\text{CDCl}_3$  at 298 K.

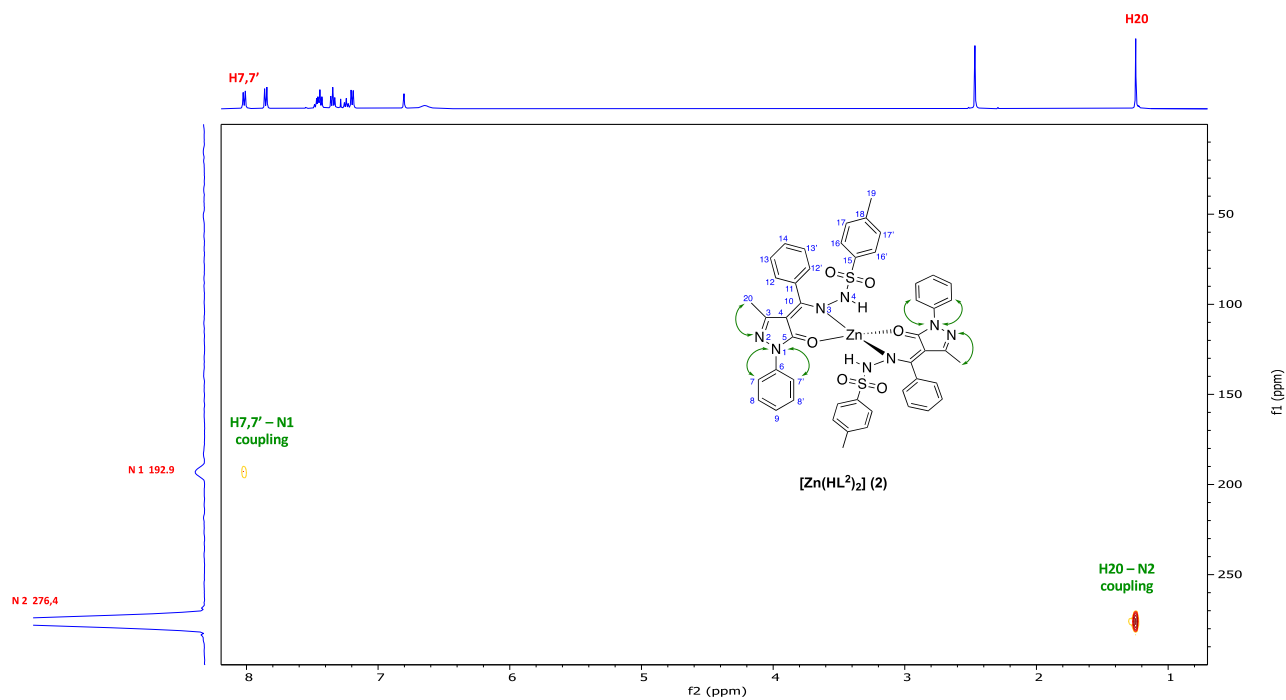

Figure S27.  $\{^1\text{H}, ^{15}\text{N}\}$ -HMBC  $[\text{Zn}(\text{HL}^2)_2]$  (2) in  $\text{CDCl}_3$  at 298 K.

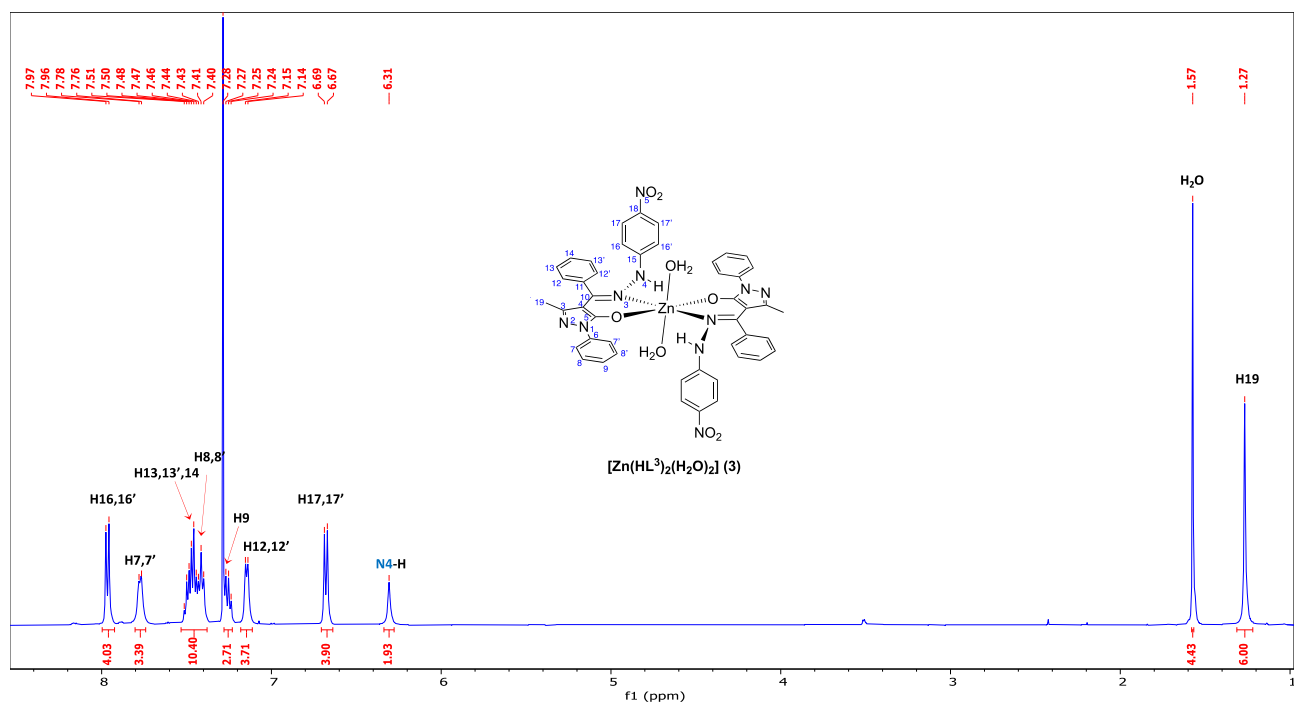

Figure S28.  $^1\text{H}$  NMR  $[\text{Zn}(\text{HL}^3)_2(\text{H}_2\text{O})_2]$  (3) in  $\text{CDCl}_3$  at 298 K.



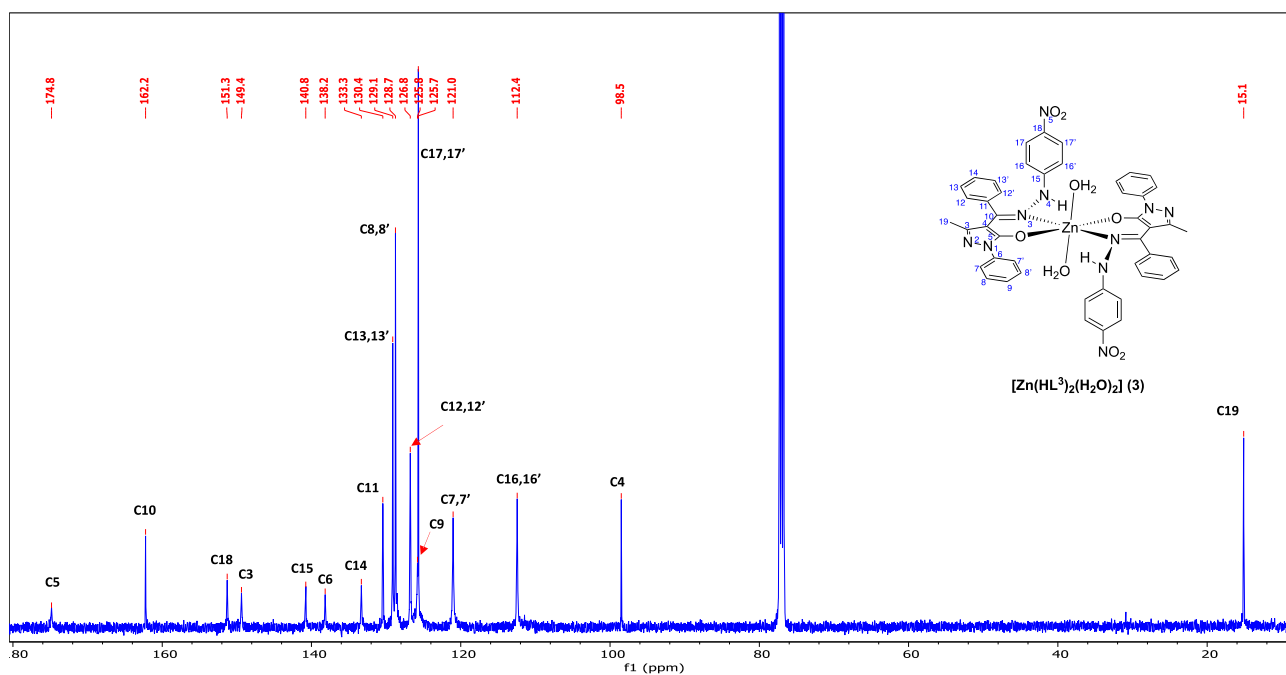

Figure S29.  $^{13}\text{C}\{^1\text{H}\}$  NMR  $[\text{Zn}(\text{HL}^3)_2(\text{H}_2\text{O})_2]$  (**3**) in  $\text{CDCl}_3$  at 298 K.

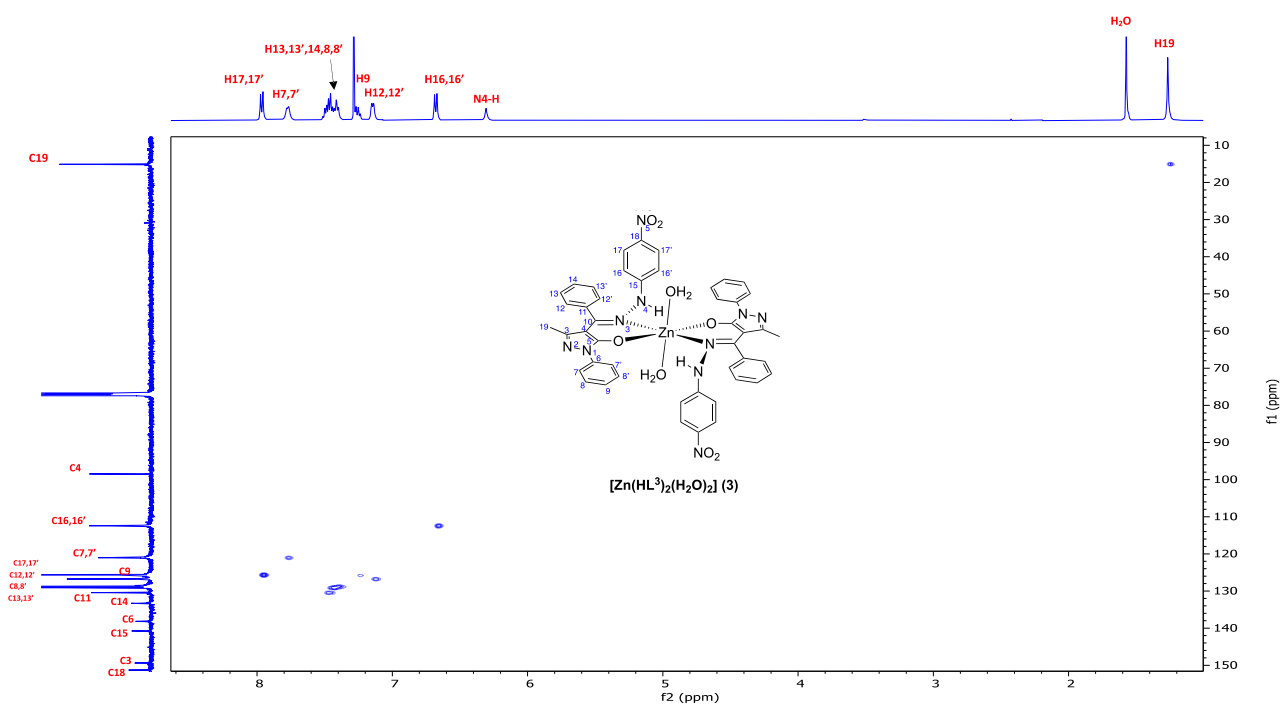

Figure S30.  $\{^1\text{H}, ^{13}\text{C}\}$ -HSQC  $[\text{Zn}(\text{HL}^3)_2(\text{H}_2\text{O})_2]$  (**3**) in  $\text{CDCl}_3$  at 298 K.

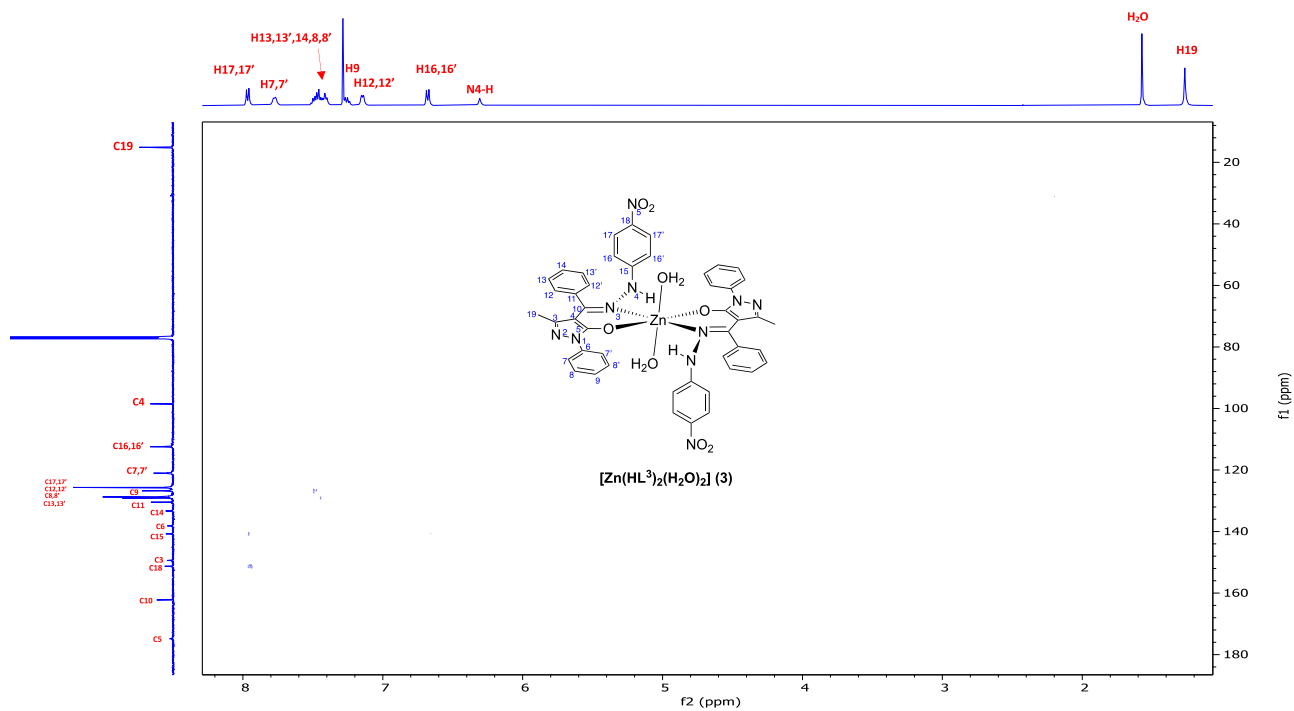

Figure S31.  $\{^1\text{H}, ^{13}\text{C}\}$ -HMBC  $[\text{Zn}(\text{HL}^3)_2(\text{H}_2\text{O})_2]$  (**3**) in  $\text{CDCl}_3$  at 298 K.

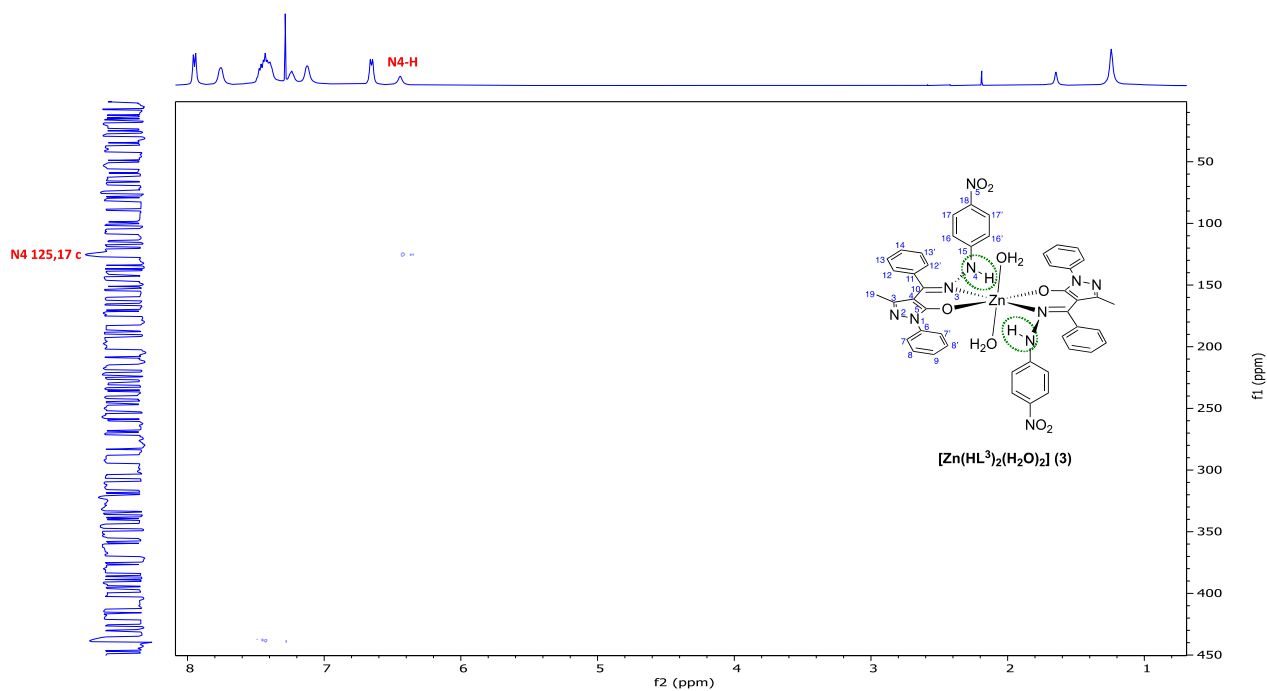

Figure S32.  $\{^1\text{H}, ^{15}\text{N}\}$ -HSQC  $[\text{Zn}(\text{HL}^3)_2(\text{H}_2\text{O})_2]$  (**3**) in  $\text{CDCl}_3$  at 298 K.

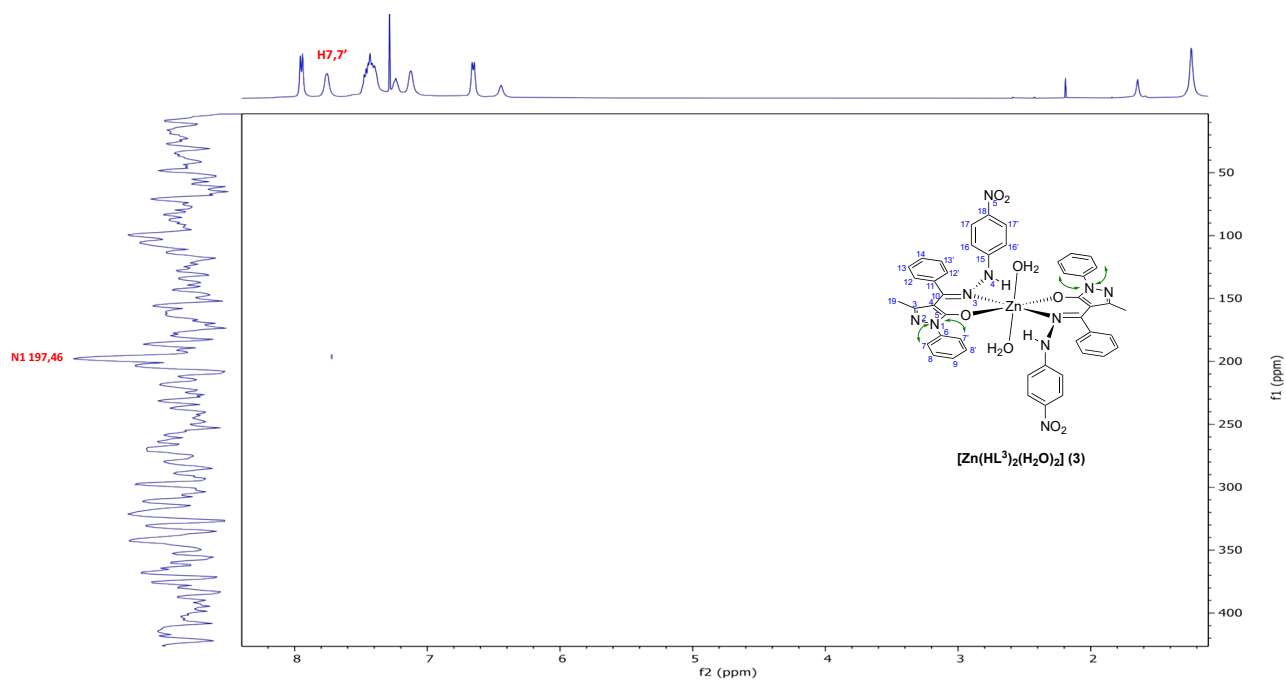

Figure S33.  $\{^1\text{H}, ^{15}\text{N}\}$ -HMBC  $[\text{Zn}(\text{HL}^3)_2(\text{H}_2\text{O})_2]$  (**3**) in  $\text{CDCl}_3$  at 298 K.

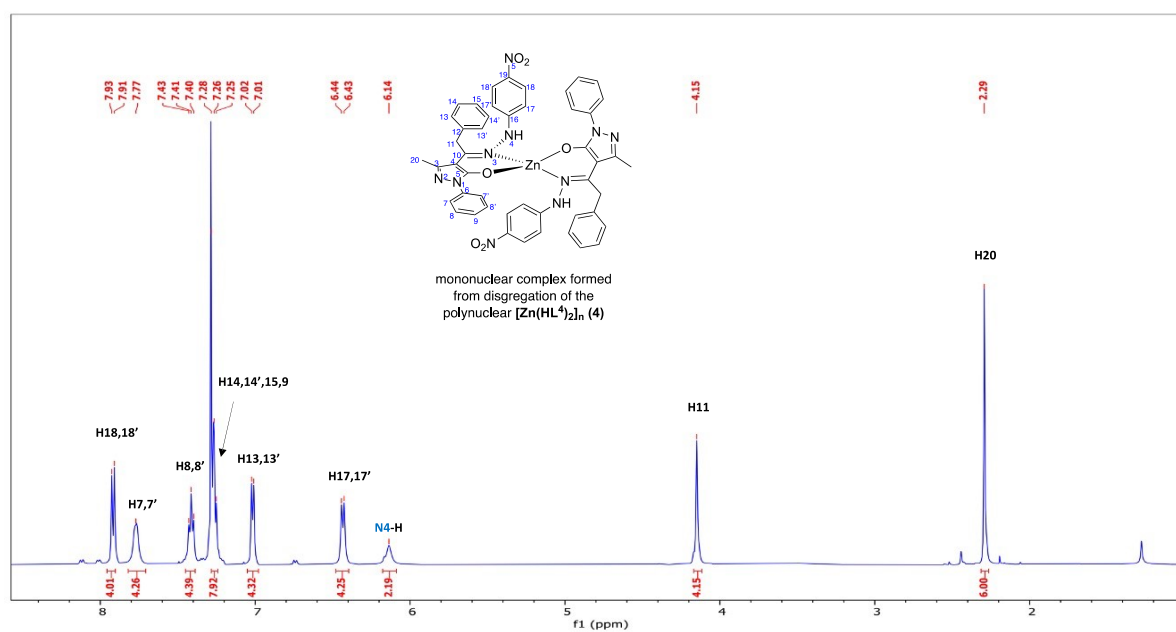

Figure S34.  $^1\text{H}$  NMR  $[\text{Zn}(\text{HL}^4)_2]$  (**4**) in  $\text{CDCl}_3$  at 298 K.

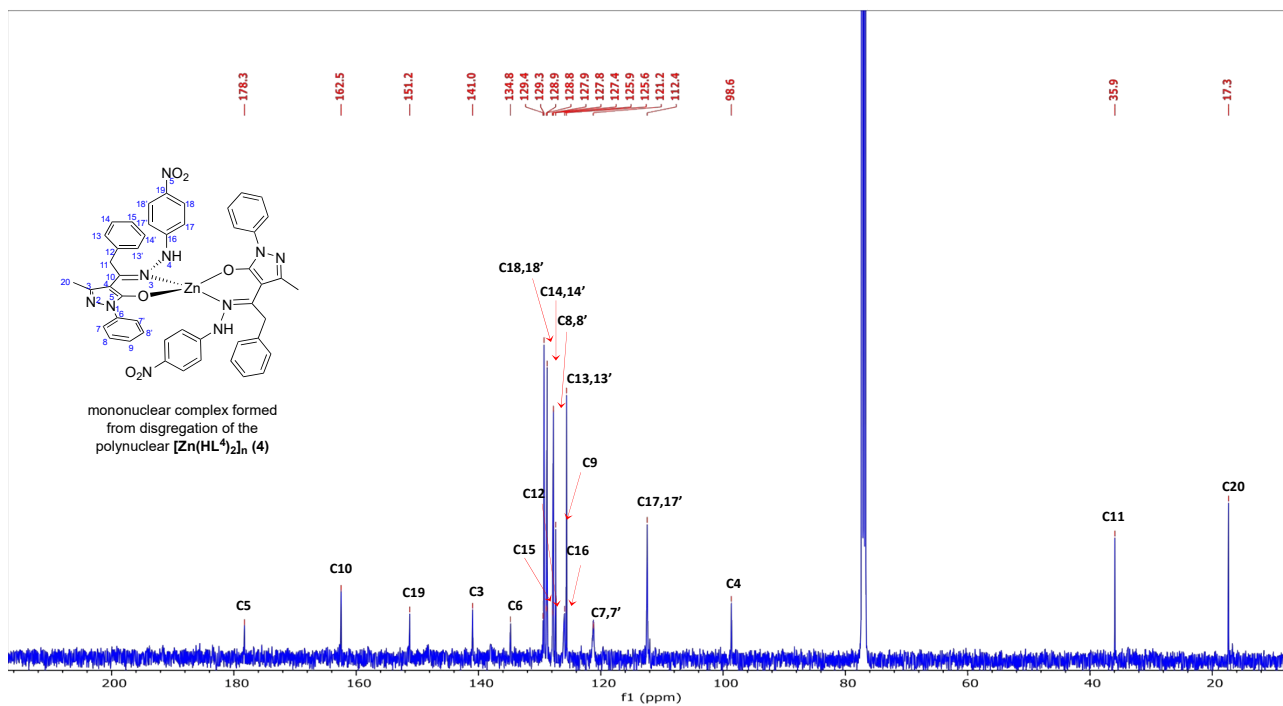

Figure S35.  $^{13}\text{C}\{^1\text{H}\}$  NMR  $[\text{Zn}(\text{HL}^4)_2]$  (**4**) in  $\text{CDCl}_3$  at 298 K.

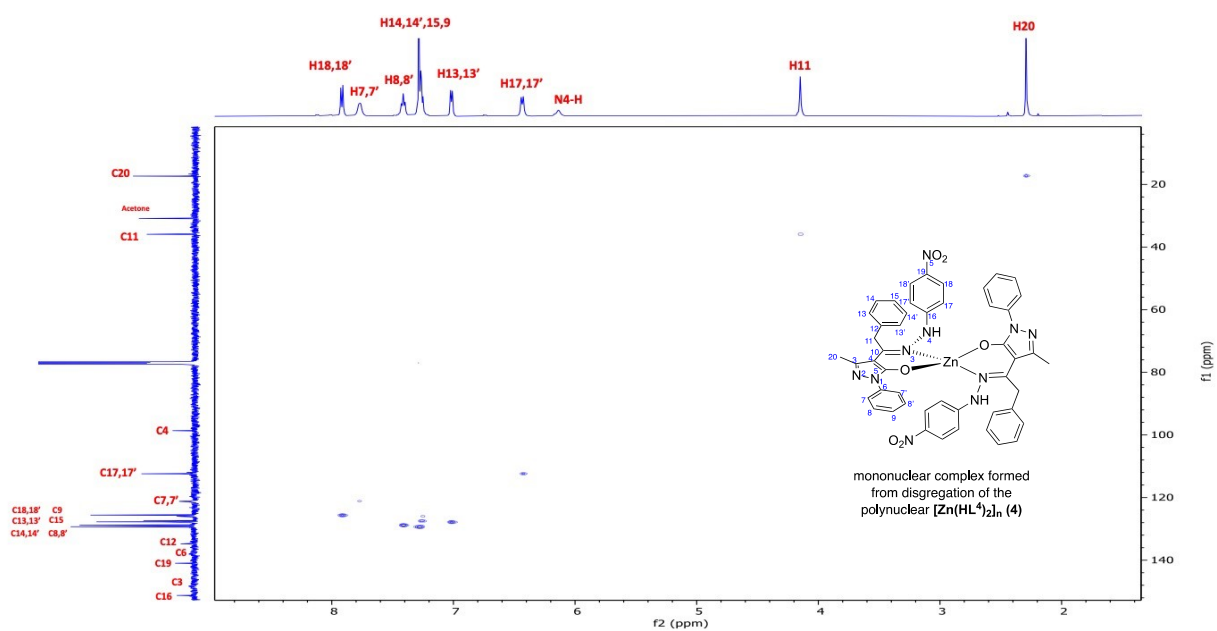

Figure S36.  $\{^1\text{H}, ^{13}\text{C}\}$ -HSQC  $[\text{Zn}(\text{HL}^4)_2]$  (**4**) in  $\text{CDCl}_3$  at 298 K.

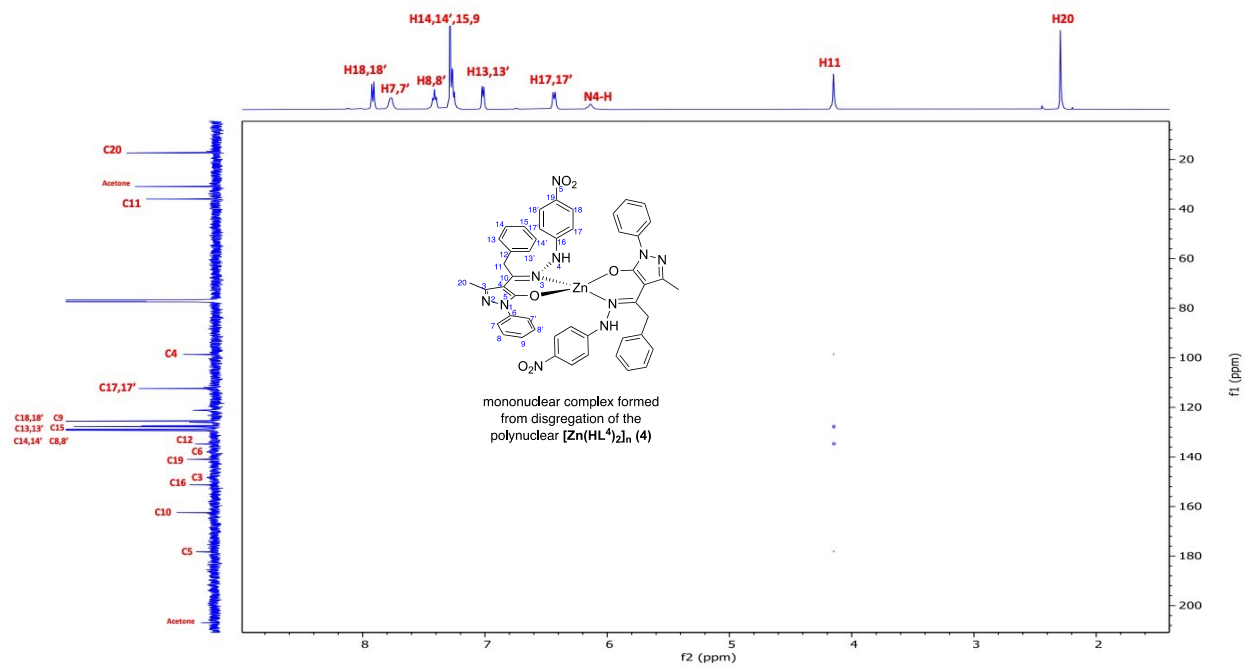

Figure S37.  $\{^1\text{H}, ^{13}\text{C}\}$ -HMBC  $[\text{Zn}(\text{HL}^4)_2]$  (**4**) in  $\text{CDCl}_3$  at 298 K.

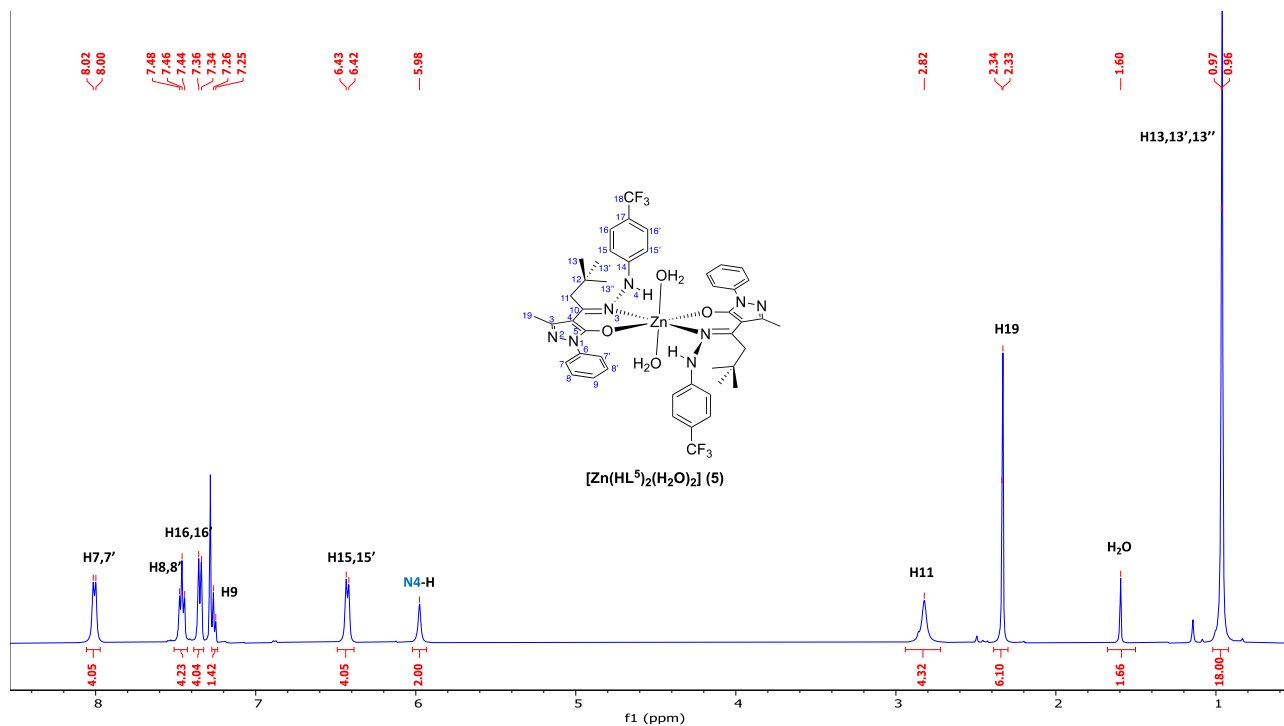

Figure S38.  $^1\text{H}$  NMR  $[\text{Zn}(\text{HL}^5)_2(\text{H}_2\text{O})_2]$  (**5**) in  $\text{CDCl}_3$  at 298 K.

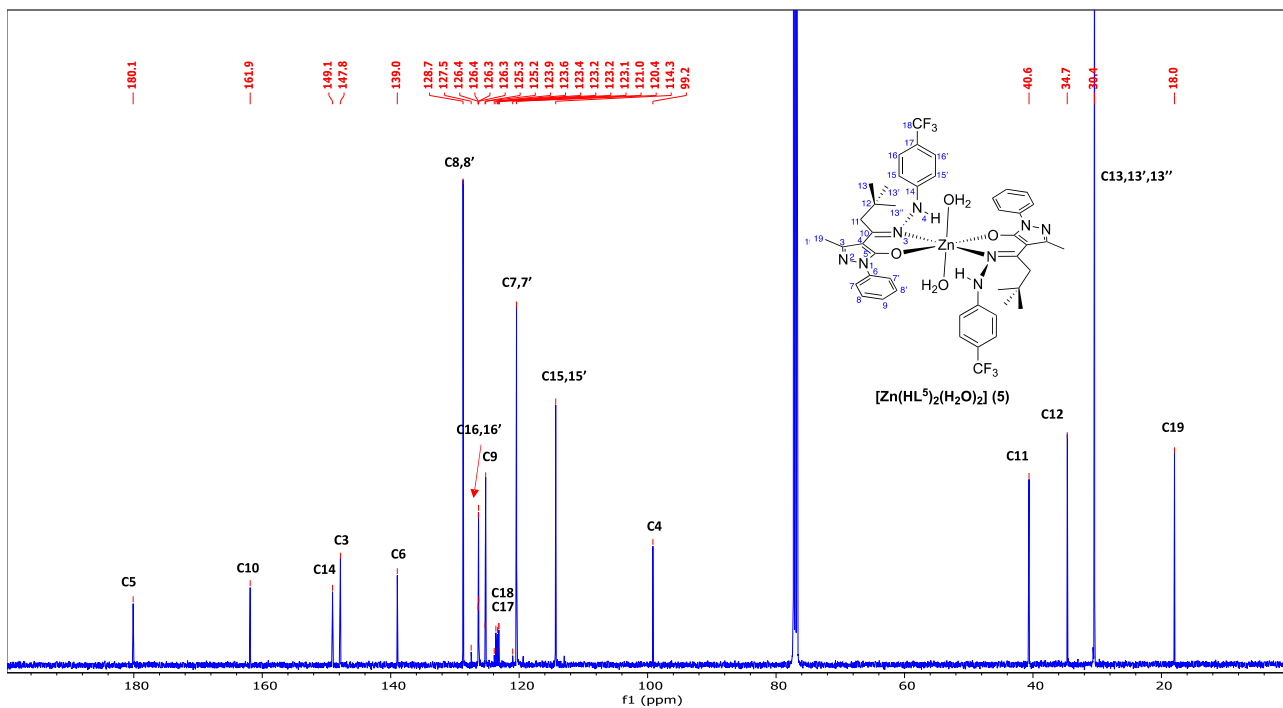

Figure S39.  $^{13}\text{C}\{^1\text{H}\}$  NMR  $[\text{Zn}(\text{HL}^5)_2(\text{H}_2\text{O})_2]$  (5) in  $\text{CDCl}_3$  at 298 K.

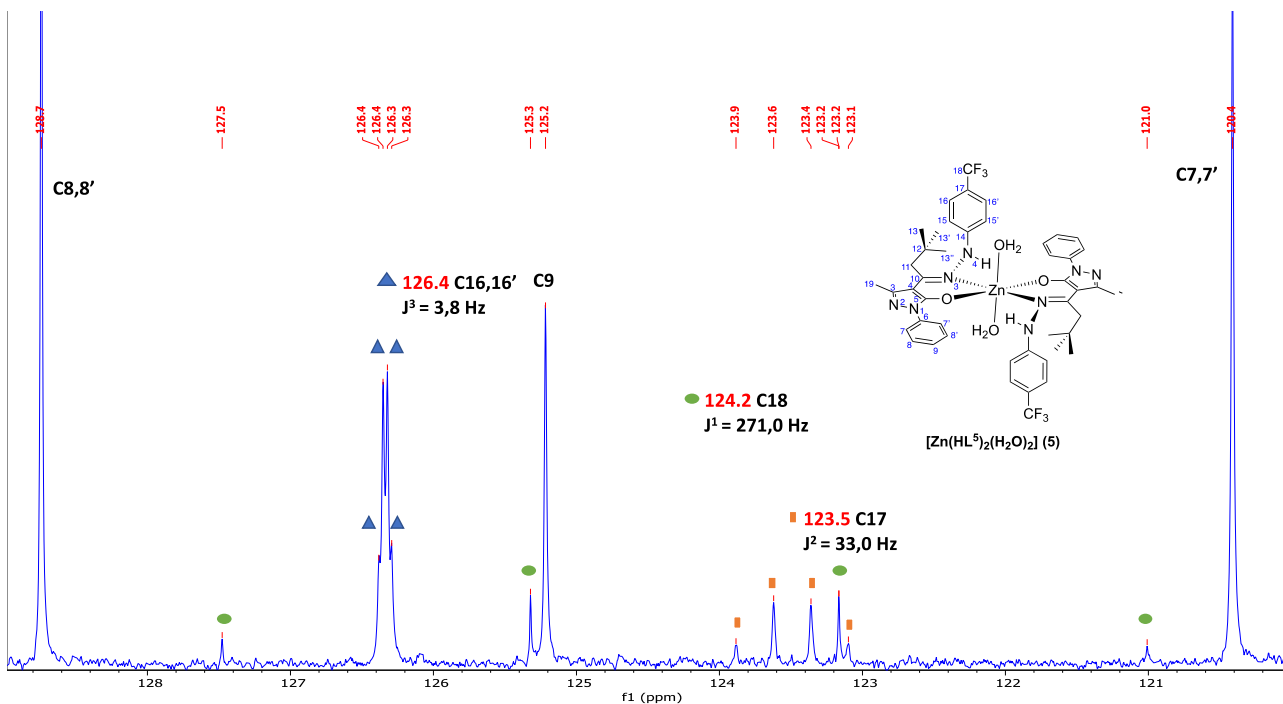

Figure S40. Magnification  $^{13}\text{C}\{^1\text{H}\}$  NMR  $[\text{Zn}(\text{HL}^5)_2(\text{H}_2\text{O})_2]$  (5) in  $\text{CDCl}_3$  at 298 K.

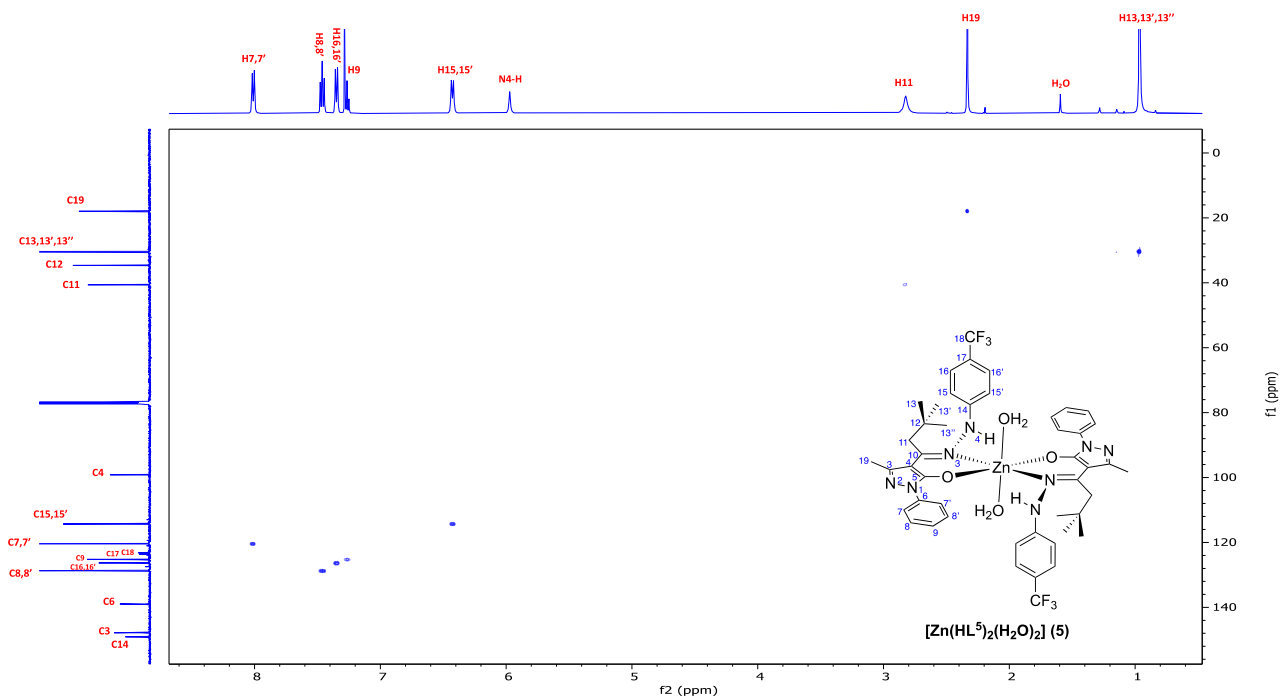

Figure S41.  $\{^1\text{H}, ^{13}\text{C}\}$ -HSQC  $[\text{Zn}(\text{HL}^5)_2(\text{H}_2\text{O})_2]$  (**5**) in  $\text{CDCl}_3$  at 298 K.

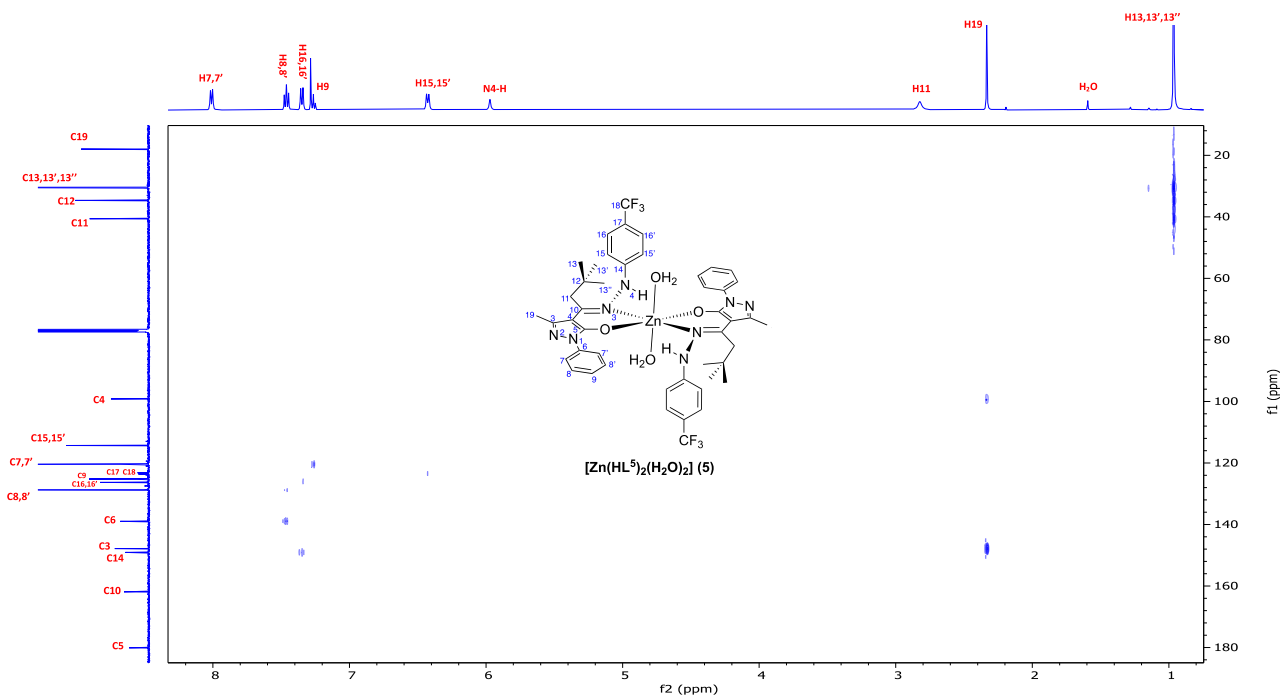

Figure S42.  $\{^1\text{H}, ^{13}\text{C}\}$ -HMBC  $[\text{Zn}(\text{HL}^5)_2(\text{H}_2\text{O})_2]$  (**5**) in  $\text{CDCl}_3$  at 298 K.

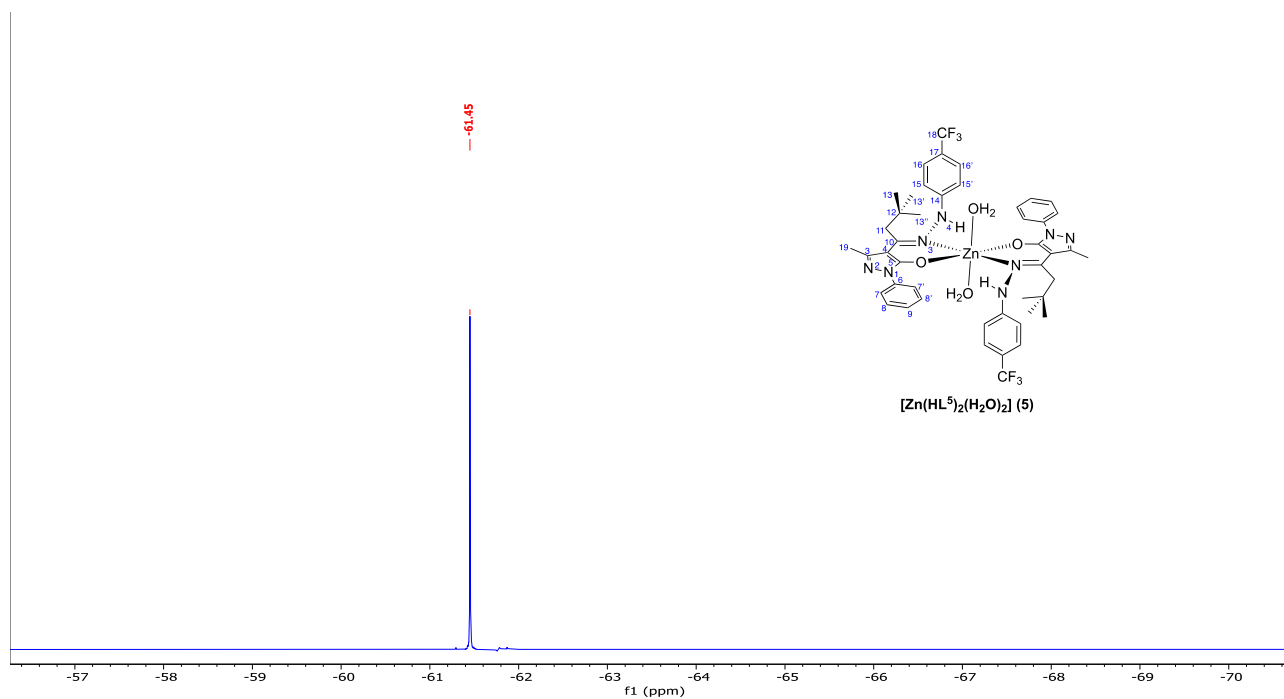

**Figure S43.**  $^{19}\text{F}\{^1\text{H}\}$  NMR  $[\text{Zn}(\text{HL}^5)_2(\text{H}_2\text{O})_2]$  (5) in  $\text{CDCl}_3$  at 298 K.

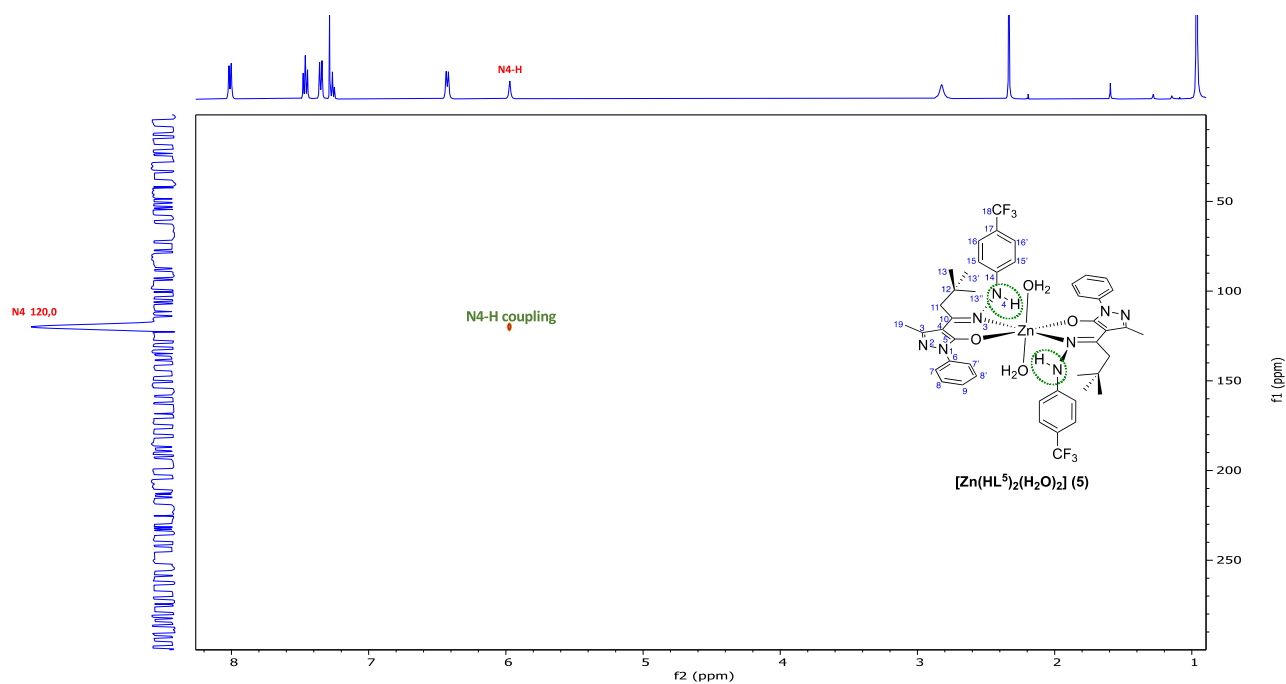

**Figure S44.**  $\{^1\text{H}, ^{15}\text{N}\}$ -HSQC  $[\text{Zn}(\text{HL}^5)_2(\text{H}_2\text{O})_2]$  (5) in  $\text{CDCl}_3$  at 298 K.



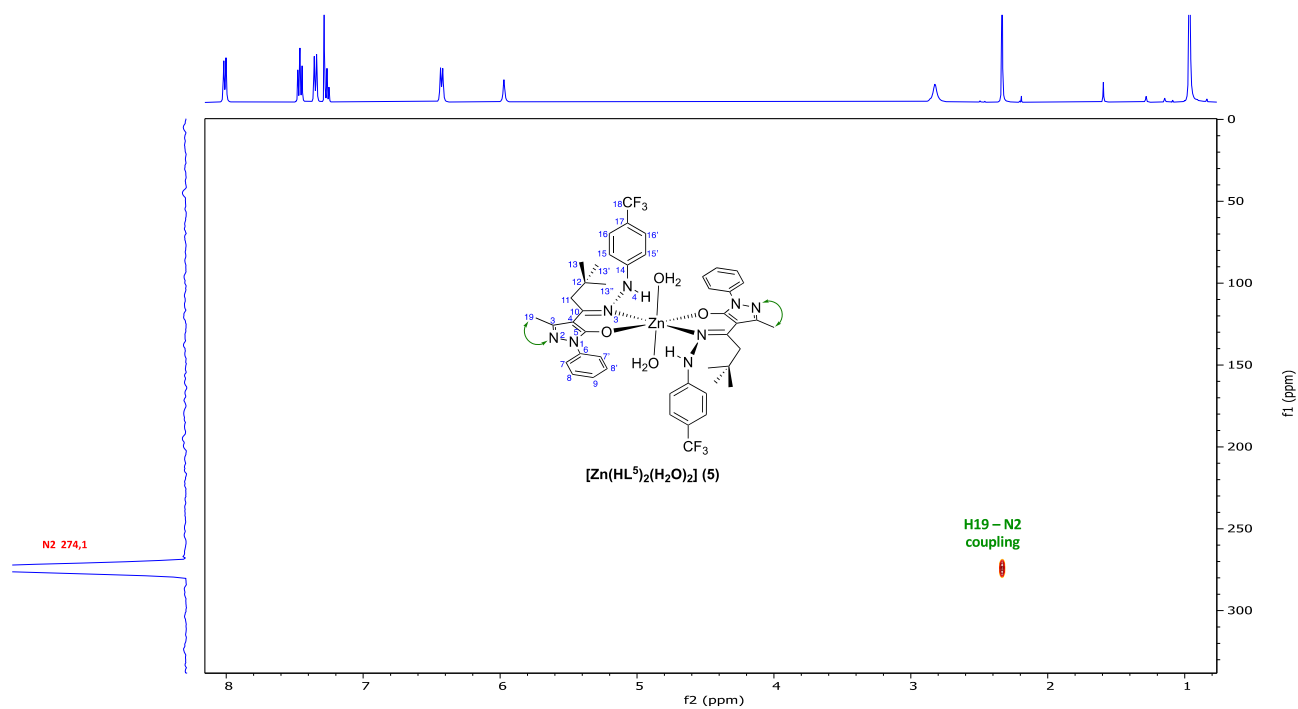

**Figure S45.**  $\{^1\text{H}, ^{15}\text{N}\}$ -HMBC  $[\text{Zn}(\text{HL}^5)_2(\text{H}_2\text{O})_2]$  (**5**) in  $\text{CDCl}_3$  at 298 K.

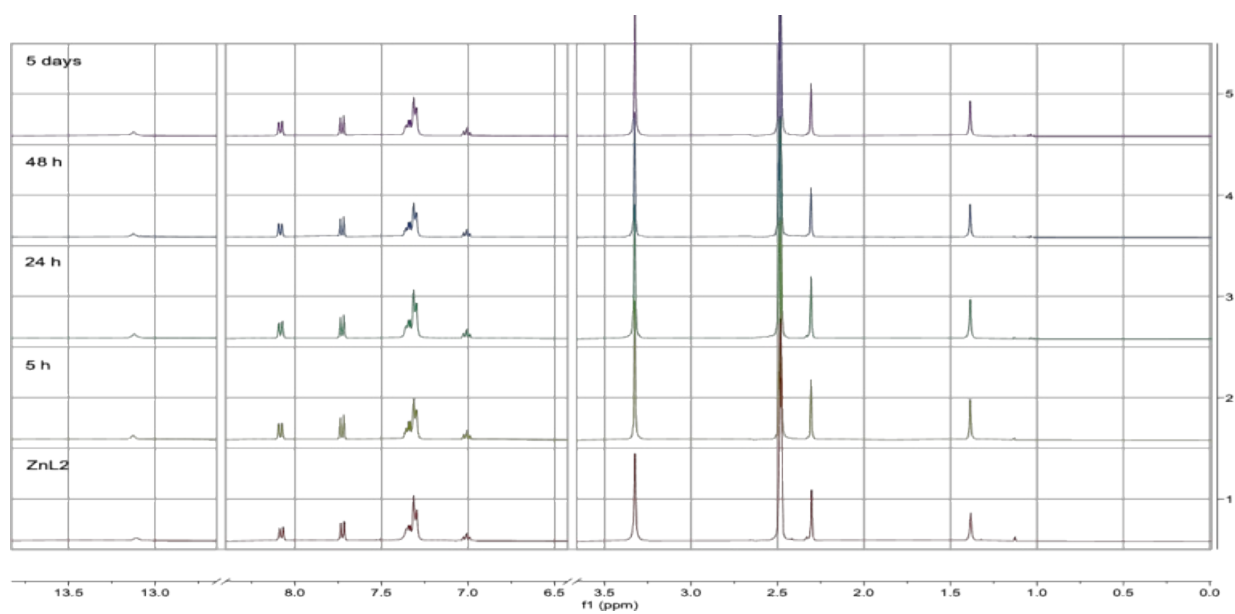

**Figure S46.** Stability study of  $[\text{Zn}(\text{HL}^2)_2]$  (**2**) in  $\text{DMSO-d}_6$ .

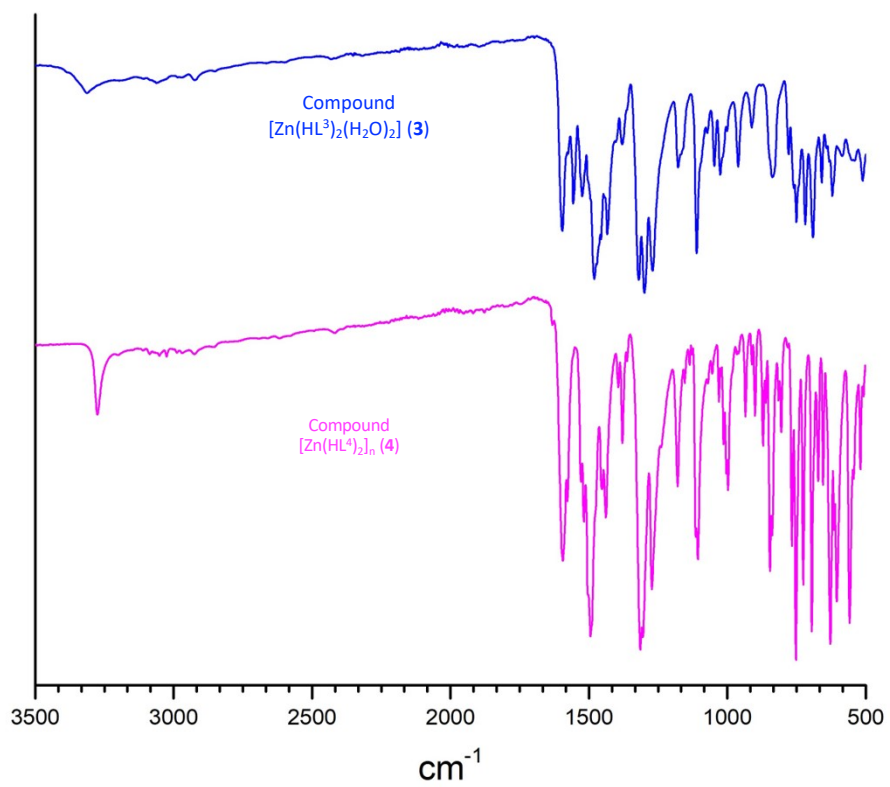

**Figure S47.** Comparison of IR spectra of  $[\text{Zn}(\text{HL}^3)_2(\text{H}_2\text{O})_2]$  (**3**) and  $[\text{Zn}(\text{HL}^3)_2]_n$  (**4**).

**Table S1.** Crystallographic data and structure refinement details of proligands H<sub>2</sub>L<sup>2</sup> and H<sub>2</sub>L<sup>4</sup>.

| Compound                                | H <sub>2</sub> L <sup>2</sup>                                       | H <sub>2</sub> L <sup>4</sup>                                 |
|-----------------------------------------|---------------------------------------------------------------------|---------------------------------------------------------------|
| Formula                                 | C <sub>24</sub> H <sub>24.4</sub> N <sub>4</sub> O <sub>4.2</sub> S | C <sub>24</sub> H <sub>21</sub> N <sub>5</sub> O <sub>3</sub> |
| CCDC                                    | 2158177                                                             | 2158178                                                       |
| M <sub>r</sub> (g mol <sup>-1</sup> )   | 468.13                                                              | 427.46                                                        |
| Crystal system                          | Monoclinic                                                          | Triclinic                                                     |
| Space group                             | C2/c                                                                | P-1                                                           |
| a (Å)                                   | 24.3936(19)                                                         | 8.8530(8)                                                     |
| b (Å)                                   | 10.9327(7)                                                          | 9.6590(8)                                                     |
| c (Å)                                   | 17.3895(12)                                                         | 12.8829(12)                                                   |
| α (°)                                   | 90                                                                  | 85.651(3)                                                     |
| β (°)                                   | 92.135(4)                                                           | 74.757(3)                                                     |
| γ (°)                                   | 90                                                                  | 78.819(3)                                                     |
| V (Å <sup>3</sup> )                     | 4634.3(6)                                                           | 1042.34(16)                                                   |
| Z                                       | 8                                                                   | 2                                                             |
| T (K)                                   | 120(2)                                                              | 293(2)                                                        |
| ρ <sub>calc</sub> (g cm <sup>-3</sup> ) | 1.342                                                               | 1.362                                                         |
| F (000)                                 | 1968                                                                | 448                                                           |
| μ (Mo Kα) (mm <sup>-1</sup> )           | 0.179                                                               | 0.093                                                         |
| GoF on F <sup>2</sup>                   | 1.007                                                               | 1.068                                                         |
| Final R indexes [I > 2σ(I)]             | R <sub>1</sub> = 0.0500;<br>wR <sub>2</sub> = 0.1102                | R <sub>1</sub> = 0.0451;<br>wR <sub>2</sub> = 0.1020          |
| Final R indexes [all data]              | R <sub>1</sub> = 0.0820;<br>wR <sub>2</sub> = 0.1249                | R <sub>1</sub> = 0.0674;<br>wR <sub>2</sub> = 0.1116          |

**Table S2.** Crystallographic data and structure refinement details of complexes **1**, **2**, and **4**.

| Compound                                | Complex 1                                                         | Complex 2                                                                       | Complex 4                                                         |
|-----------------------------------------|-------------------------------------------------------------------|---------------------------------------------------------------------------------|-------------------------------------------------------------------|
| Formula                                 | C <sub>44</sub> H <sub>38</sub> N <sub>10</sub> O <sub>2</sub> Zn | C <sub>50</sub> H <sub>52</sub> N <sub>8</sub> O <sub>6</sub> S <sub>2</sub> Zn | C <sub>48</sub> H <sub>40</sub> N <sub>10</sub> O <sub>6</sub> Zn |
| CCDC                                    | 2158179                                                           | 2158180                                                                         | 2158176                                                           |
| M <sub>r</sub> (g mol <sup>-1</sup> )   | 804.21                                                            | 1022.48                                                                         | 918.27                                                            |
| Crystal system                          | Triclinic                                                         | Monoclinic                                                                      | Triclinic                                                         |
| Space group                             | P-1                                                               | C2/c                                                                            | P-1                                                               |
| a (Å)                                   | 9.8944(6)                                                         | 17.44(3)                                                                        | 9.8009(8)                                                         |
| b (Å)                                   | 11.3405(6)                                                        | 13.34(2)                                                                        | 9.9718(9)                                                         |
| c (Å)                                   | 18.1843(10)                                                       | 22.28(4)                                                                        | 12.2060(12)                                                       |
| α (°)                                   | 89.300(2)                                                         | 90                                                                              | 88.090(3)                                                         |
| β (°)                                   | 86.246(2)                                                         | 105.95(3)                                                                       | 70.399(3)                                                         |
| γ (°)                                   | 67.2918(18)                                                       | 90                                                                              | 73.834(3)                                                         |
| V (Å <sup>3</sup> )                     | 1878.02(18)                                                       | 4987(16)                                                                        | 1076.97(17)                                                       |
| Z                                       | 2                                                                 | 4                                                                               | 1                                                                 |
| T (K)                                   | 100(2)                                                            | 273.15                                                                          | 298(2)                                                            |
| ρ <sub>calc</sub> (g cm <sup>-3</sup> ) | 1.422                                                             | 1.362                                                                           | 1.416                                                             |
| F (000)                                 | 836                                                               | 2136                                                                            | 476                                                               |
| μ (Mo Kα) (mm <sup>-1</sup> )           | 0.708                                                             | 0.637                                                                           | 0.634                                                             |
| GoF on F <sup>2</sup>                   | 1.060                                                             | 1.048                                                                           | 1.017                                                             |
| Final R indexes [I ≥ 2σ]                | R <sub>1</sub> = 0.0561;<br>wR <sub>2</sub> = 0.1450              | R <sub>1</sub> = 0.0561;<br>wR <sub>2</sub> = 0.1367                            | R <sub>1</sub> = 0.0739;<br>wR <sub>2</sub> = 0.1476              |
| Final R indexes [all data]              | R <sub>1</sub> = 0.0731;<br>wR <sub>2</sub> = 0.1538              | R <sub>1</sub> = 0.0773;<br>wR <sub>2</sub> = 0.1585                            | R <sub>1</sub> = 0.1479;<br>wR <sub>2</sub> = 0.1765              |

**Table S3.** Energies (Hartree) and relative energy differences (kcal/mol) for the tautomers I and II of proligands  $H_2L^2$ ,  $H_2L^4$  and  $H_2L^5$ .

|                       | $H_2L^2$                                                                          |                                                                                   | $H_2L^4$                                                                           |                                                                                     |
|-----------------------|-----------------------------------------------------------------------------------|-----------------------------------------------------------------------------------|------------------------------------------------------------------------------------|-------------------------------------------------------------------------------------|
|                       | Tautomer I                                                                        | Tautomer II                                                                       | Tautomer I                                                                         | Tautomer II                                                                         |
|                       | 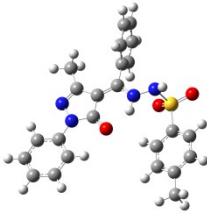 |  |  |  |
| E                     | -1770.946848                                                                      | -1770.937687                                                                      | -1426.865589                                                                       | -1426.864598                                                                        |
| $E_o$                 | -1770.526114                                                                      | -1770.517408                                                                      | -1426.450842                                                                       | -1426.450241                                                                        |
| $E_t$                 | -1770.497523                                                                      | -1770.48903                                                                       | -1426.423841                                                                       | -1426.423223                                                                        |
| H                     | -1770.496579                                                                      | -1770.488085                                                                      | -1426.422897                                                                       | -1426.422279                                                                        |
| G                     | -1770.590327                                                                      | -1770.58033                                                                       | -1426.513320                                                                       | -1426.512049                                                                        |
| $\Delta E$            | 0.0                                                                               | 5.7                                                                               | 0.0                                                                                | 0.6                                                                                 |
| $\Delta G$            | 0.0                                                                               | 6.3                                                                               | 0.0                                                                                | 0.8                                                                                 |
| $\Delta E_{(CHCl_3)}$ | 0.0                                                                               | 6.6                                                                               | 0.0                                                                                | 2.8                                                                                 |
| $\Delta G_{(CHCl_3)}$ | 0.0                                                                               | 7.1                                                                               | 0.0                                                                                | 2.9                                                                                 |

|                       | $H_2L^5$                                                                            |                                                                                      |
|-----------------------|-------------------------------------------------------------------------------------|--------------------------------------------------------------------------------------|
|                       | Tautomer I                                                                          | Tautomer II                                                                          |
|                       | 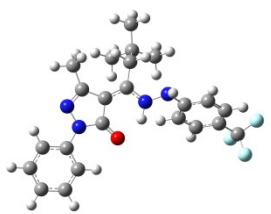 |  |
| E                     | -1485.635608                                                                        | -1485.630883                                                                         |
| $E_o$                 | -1485.187451                                                                        | -1485.183379                                                                         |
| $E_t$                 | -1485.158598                                                                        | -1485.154414                                                                         |
| H                     | -1485.157654                                                                        | -1485.153470                                                                         |
| G                     | -1485.250309                                                                        | -1485.245797                                                                         |
| $\Delta E$            | 0                                                                                   | 3.0                                                                                  |
| $\Delta G$            | 0                                                                                   | 2.8                                                                                  |
| $\Delta E_{(CHCl_3)}$ | 0                                                                                   | 4.3                                                                                  |
| $\Delta G_{(CHCl_3)}$ | 0                                                                                   | 4.2                                                                                  |

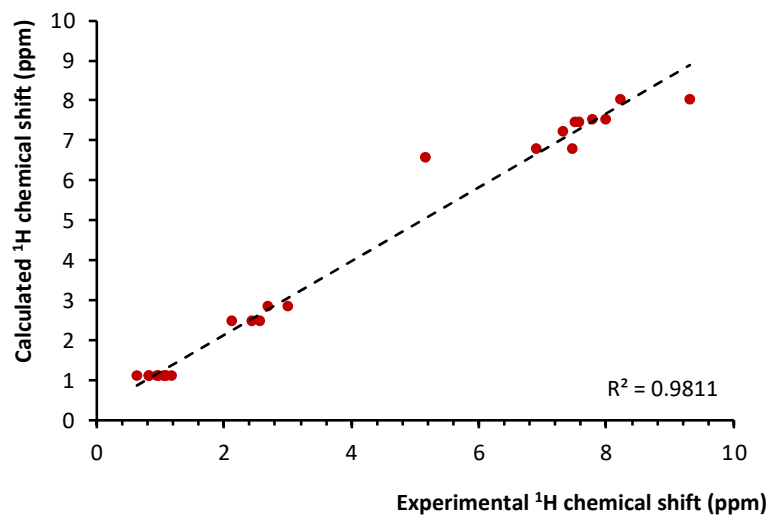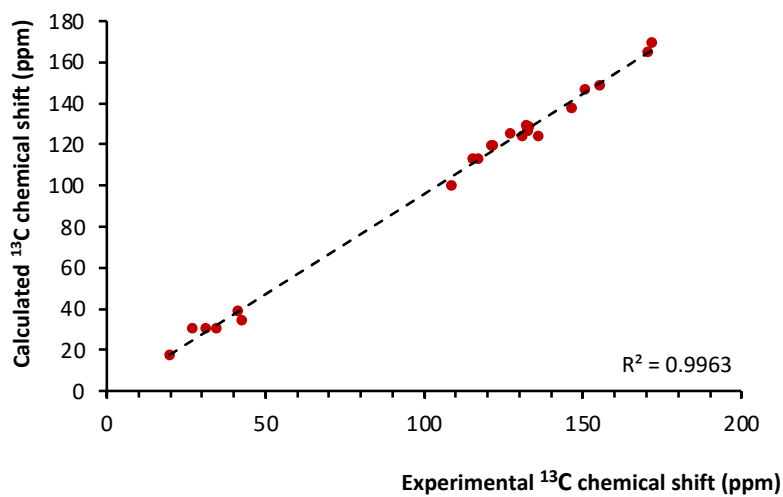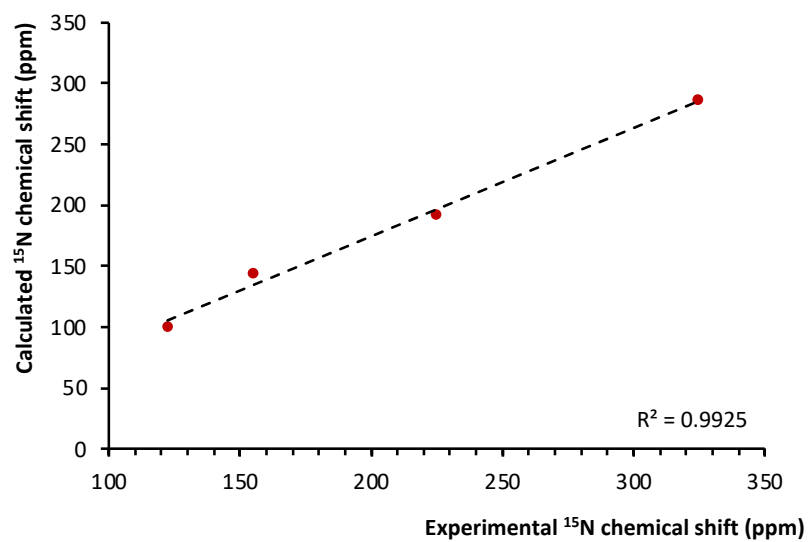

**Figure S48.** Comparison of the calculated (tautomer I) and experimental  $^1\text{H}$ ,  $^{13}\text{C}$  and  $^{15}\text{N}$  NMR spectra of  $\text{H}_2\text{L}^5$ .

**H<sub>2</sub>L<sup>2</sup>**

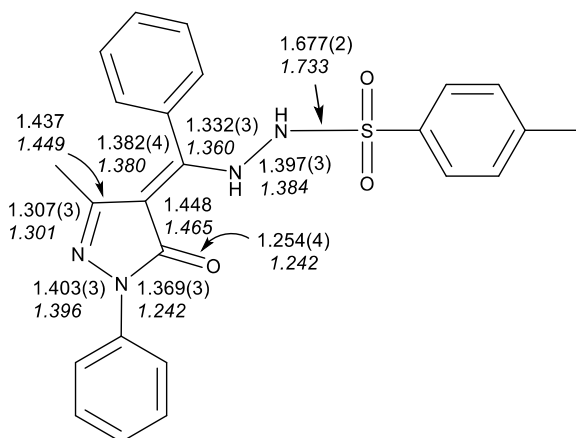

**I**

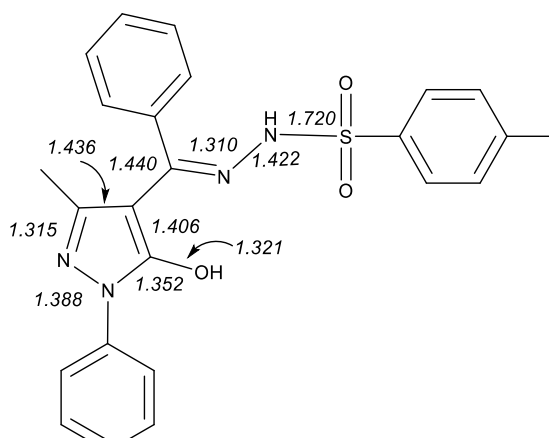

**II**

**H<sub>2</sub>L<sup>4</sup>**

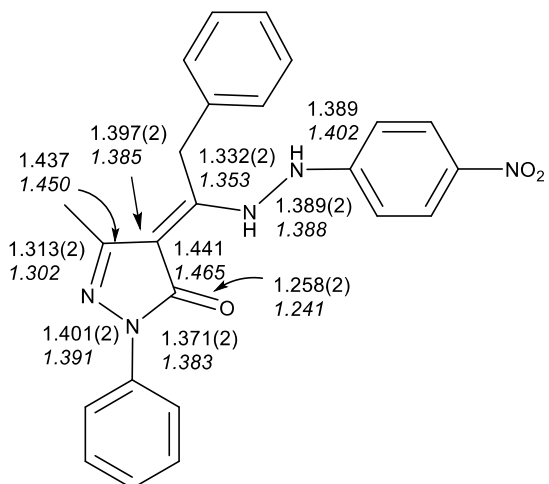

**I**

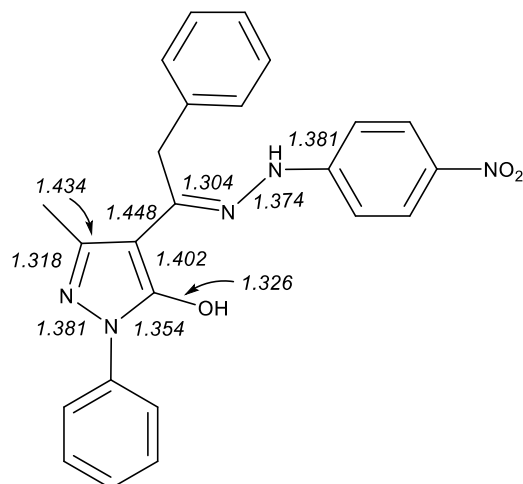

**II**

**Figure S49.** Comparison of selected bond distances of H<sub>2</sub>L<sup>2</sup> and H<sub>2</sub>L<sup>4</sup>: calculated tautomers I and II (*italic*) and experimental.

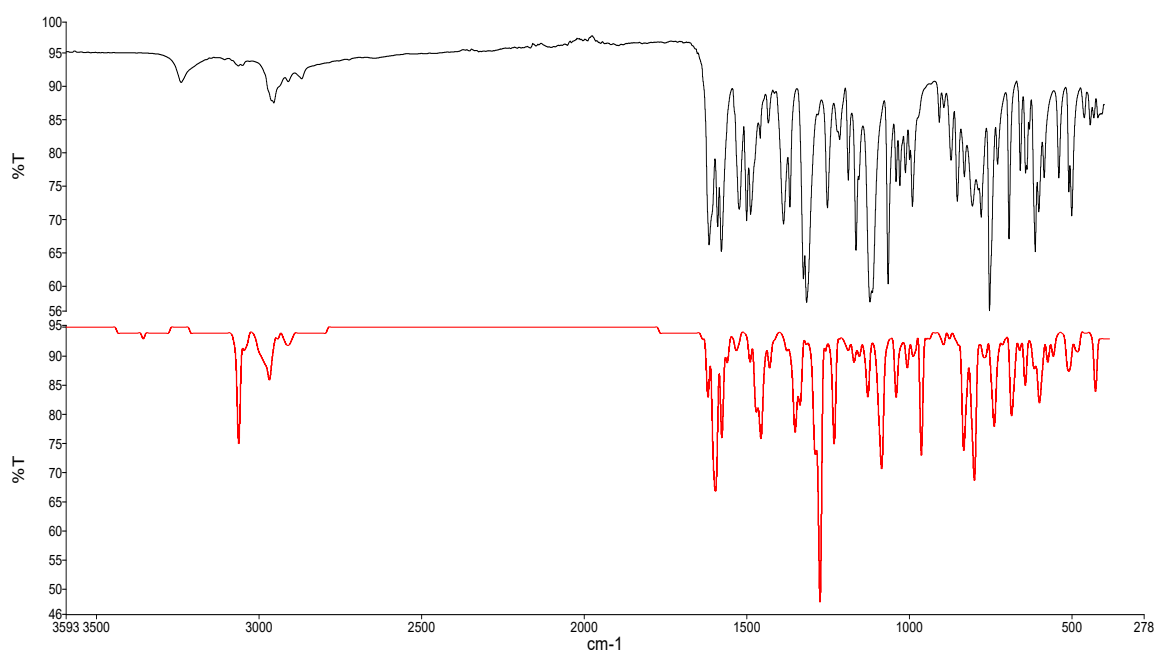

**Figure S50.** Comparison of experimental (black line) and calculated (tautomer I, red line) IR spectrum of  $H_2L^5$ .

**Table S4.** Selected stretching assignments of the IR spectrum of  $H_2L^5$ .

| IR band ( $cm^{-1}$ ) | Experimental | Calculated |
|-----------------------|--------------|------------|
| $\nu(N3-H)$           | 3064         | 3062       |
| $\nu(C=N2)$           | 1524         | 1530       |
| $\nu(C=O)$            | 1615         | 1618       |
| $\nu_{as}(C-F)$       | 1315, 1065   | 1274, 1084 |
| $\nu_s(C-F)$          | 1163         | 1127       |

*Optimized [HL<sup>1</sup>]*

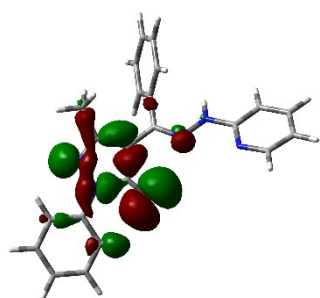

HOMO-2

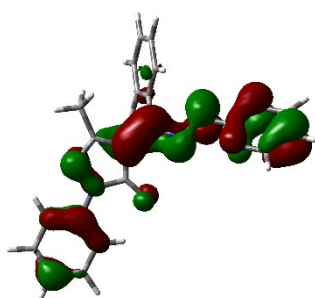

HOMO-3

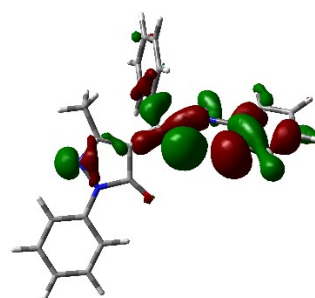

HOMO-5

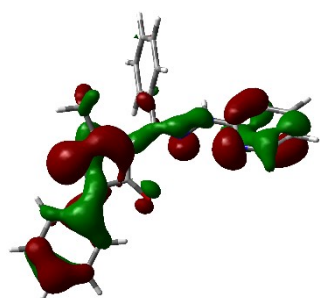

HOMO-6

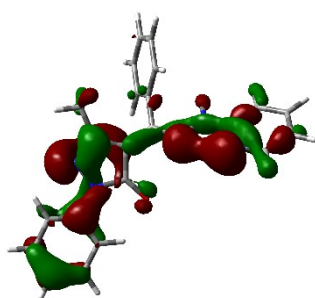

HOMO-7

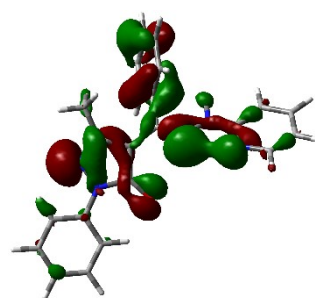

HOMO-8

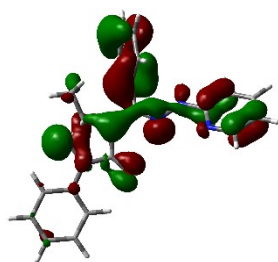

HOMO-9

*Single point calculation of [HL<sup>1</sup>] from the optimization of 1.*

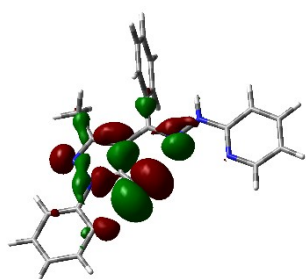

HOMO-2

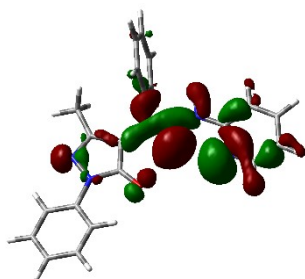

HOMO-4

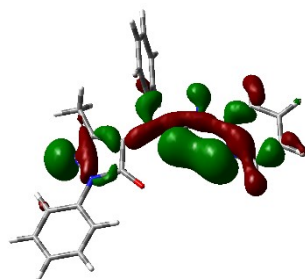

HOMO-6

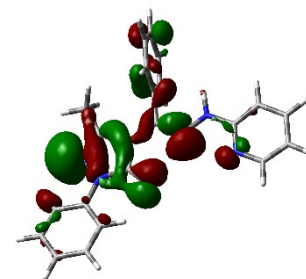

HOMO-8



*Optimized [HL<sup>2-</sup>]*

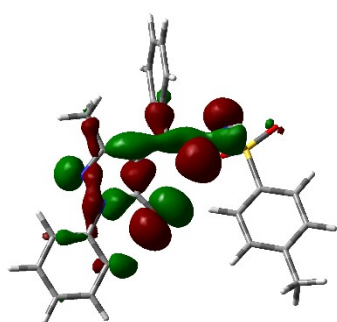

HOMO-2

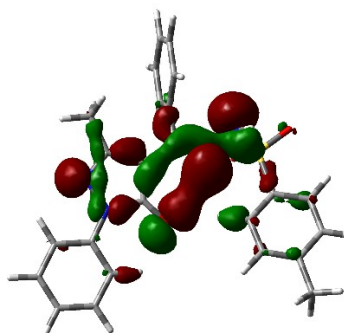

HOMO-3

*Single point calculation of [HL<sup>2-</sup>] from the optimization of 2.*

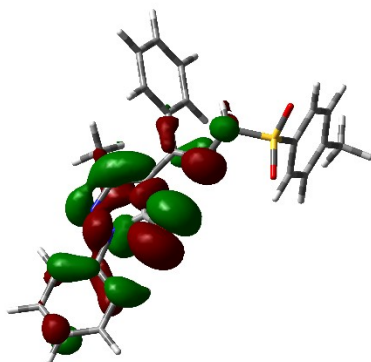

HOMO-1

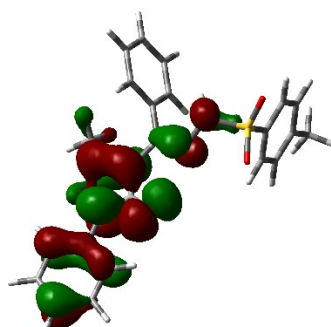

HOMO-2

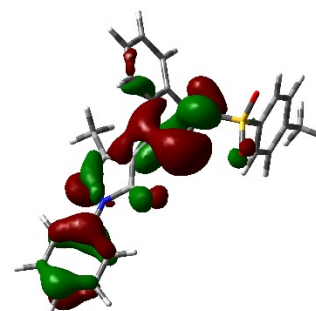

HOMO-3

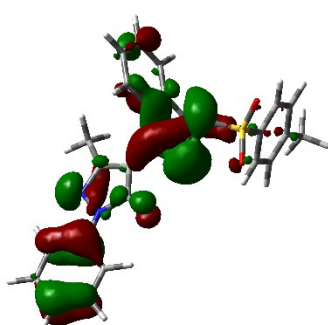

HOMO-5

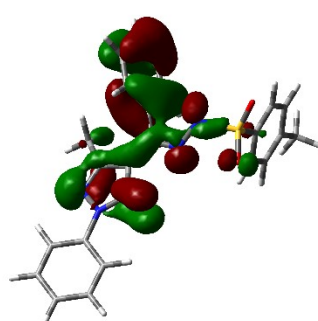

HOMO-8

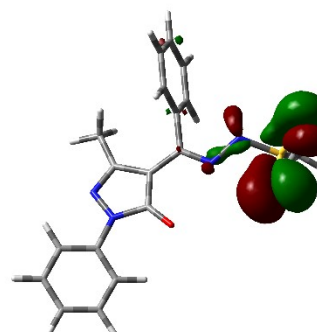

HOMO-13

*Optimized [HL<sup>4-</sup>]*

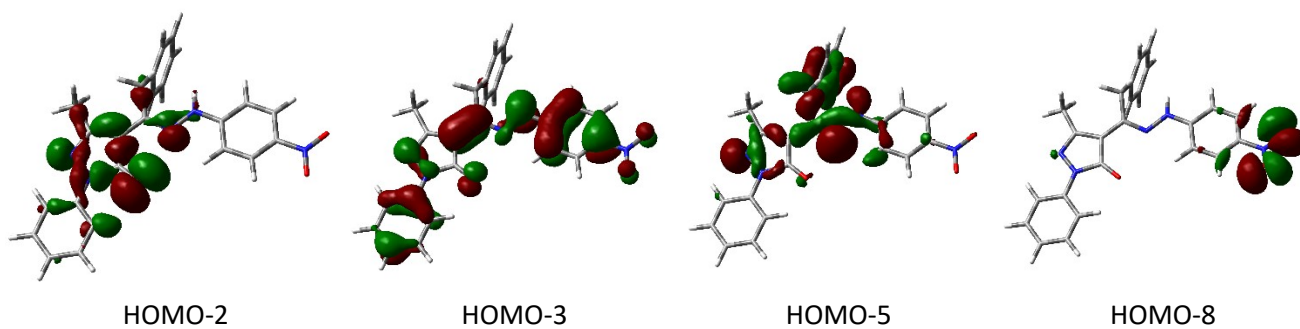

*Single point calculation of [HL<sup>4-</sup>] from the optimization of 4.*

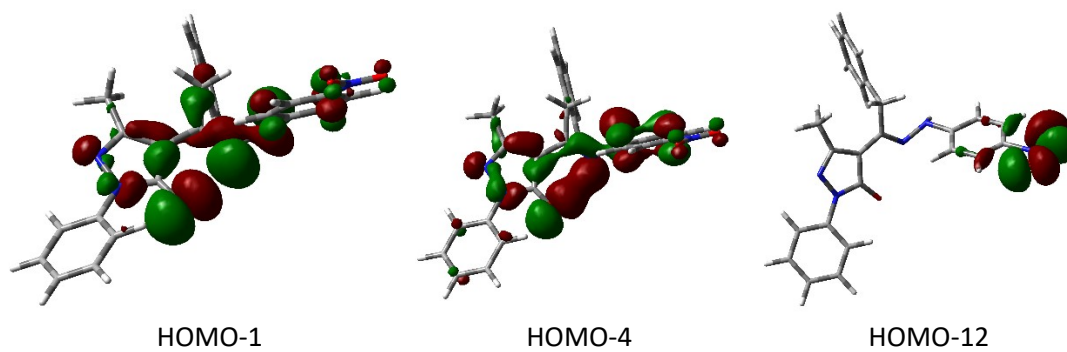

**Figure S51.** MOs of anionic ligands [HL<sup>1-</sup>], [HL<sup>2-</sup>] and [HL<sup>4-</sup>], involved in the coordination to metal centers.

**Figure S52.** Optimized structures of complexes **1** and **2**.

Complex **1** -  $[\text{Zn}(\text{HL}^1)]_2$

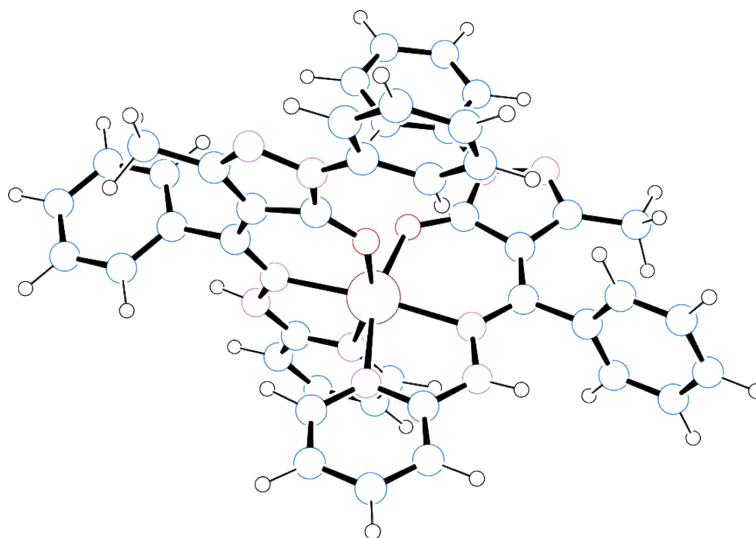

Complex **2** -  $[\text{Zn}(\text{HL}^2)]_2$

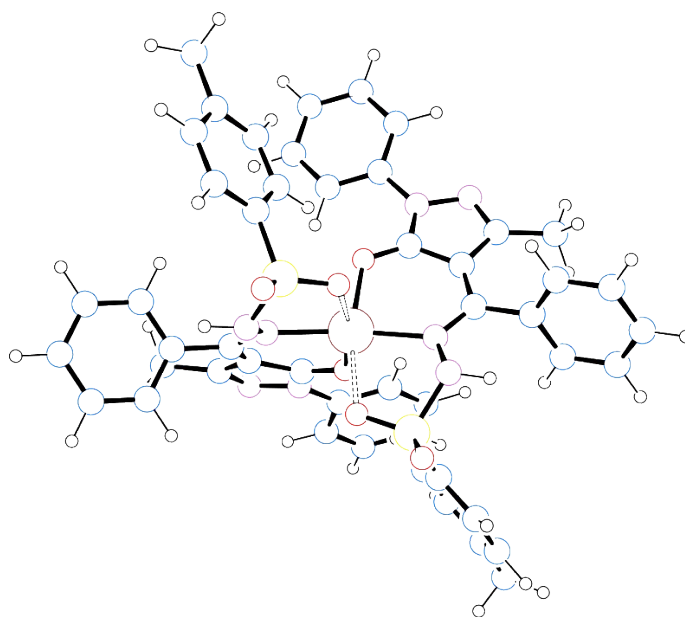

**Table S5.** Comparison of selected experimental and calculated structural parameters of complexes **1** and **2**.

**1, [Zn(HL<sup>1</sup>)]<sub>2</sub>**

| Bond distances (Å) and angles (°) * | Experimental | Calculated |
|-------------------------------------|--------------|------------|
| Zn-N3 <sub>A</sub>                  | 2.151(2)     | 2.178      |
| Zn-N5 <sub>A</sub>                  | 2.132(2)     | 2.183      |
| Zn-O <sub>A</sub>                   | 2.051(2)     | 2.053      |
| Zn-N3 <sub>B</sub>                  | 2.143(2)     | 2.176      |
| Zn-N5 <sub>B</sub>                  | 2.142(2)     | 2.183      |
| Zn-O <sub>B</sub>                   | 2.049(2)     | 2.053      |
| C-O                                 | 1.270        | 1.262      |
| C-N3                                | 1.310        | 1.318      |
| N3 <sub>A</sub> -Zn-N5 <sub>A</sub> | 76.33(9)     | 76.0       |
| N3 <sub>A</sub> -Zn-N5 <sub>B</sub> | 98.99(9)     | 100.3      |
| N3 <sub>A</sub> -Zn-O <sub>A</sub>  | 87.22(8)     | 86.7       |
| O <sub>A</sub> -Zn-O <sub>B</sub>   | 88.80(8)     | 94.5       |
| O <sub>A</sub> -Zn-N5 <sub>B</sub>  | 90.30(9)     | 88.7       |
| O <sub>A</sub> -Zn-N5 <sub>A</sub>  | 163.54(8)    | 162.6      |

\* A and B are the two ligands of the complex (see Table S1).

**2, [Zn(HL<sup>2</sup>)]<sub>2</sub>**

| Bond distances (Å) and angles (°) | Experimental | Calculated |
|-----------------------------------|--------------|------------|
| Zn-N                              | 1.998(4)     | 2.109      |
| Zn-O                              | 1.958(3)     | 2.032      |
| O <sub>SO2</sub> -Zn              | 2.770        | 2.277      |
| C-O                               | 1.275        | 1.270      |
| C-N                               | 1.330        | 1.317      |
| N3-N4                             | 1.432        | 1.403      |
| C4-C10                            | 1.425        | 1.425      |
| O-Zn-N                            | 96.95(12)    | 90.1       |
| O-Zn-O <sub>SO2</sub>             | 163.26       | 167.7      |

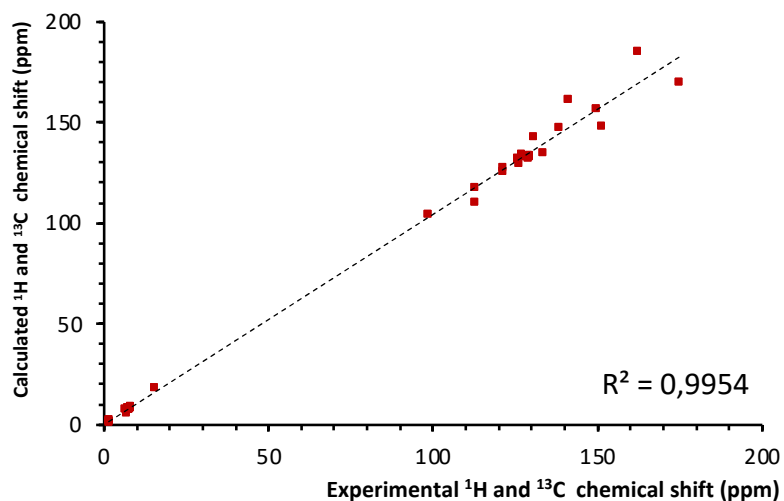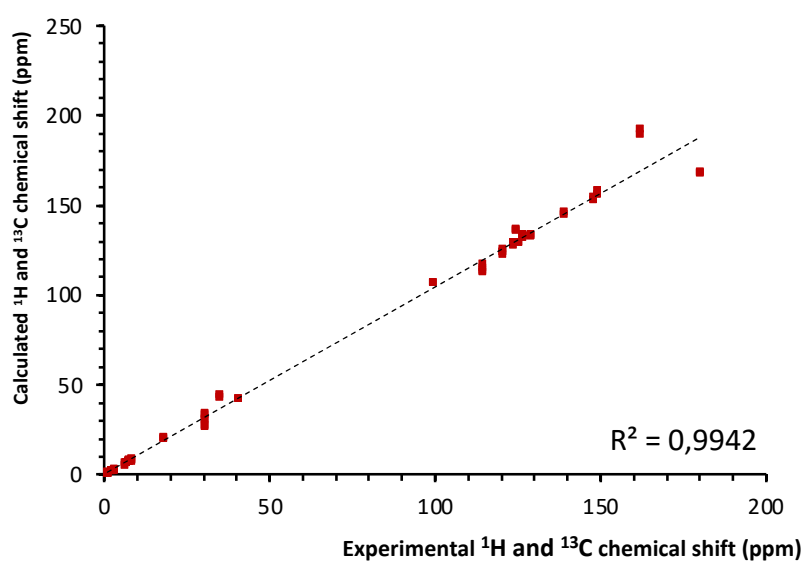

**Figure S53.** Comparison of the calculated and experimental  $^1\text{H}$  and  $^{13}\text{C}$  NMR spectra of complexes **3** (top) and **5** (bottom).

**Table S6.** Comparison of selected experimental and calculated structural parameters of complex **4**.

| Bond distances (Å) and angles (°)   | 4, $[\text{Zn}(\text{HL}^4)]_n$ |                                            |
|-------------------------------------|---------------------------------|--------------------------------------------|
|                                     | Experimental                    | $[\text{Zn}(\text{HL}^4)]_3$<br>Calculated |
| Zn-N                                | 2.069(3)                        | 2.109                                      |
| Zn-O                                | 2.004(3)                        | 2.032                                      |
| Zn-O <sub>NO2</sub>                 | 2.342(3)                        | 2.383                                      |
| C-O                                 | 1.274                           | 1.271                                      |
| C-N                                 | 1.312                           | 1.325                                      |
| N-Zn-N                              | 180.0                           | 180.0                                      |
| O-Zn-O                              | 180.0                           | 180.0                                      |
| Centroid-Centroid ( $\pi$ stacking) | 4.155                           | 4.449                                      |

**Table S7.** Coordinates of the optimized compounds.

**[HL<sup>1</sup>]<sup>-</sup>**

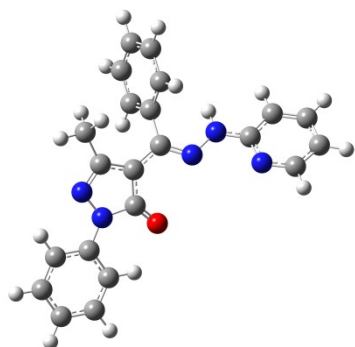

|   |             |             |             |
|---|-------------|-------------|-------------|
| C | -4.08636500 | -3.65555600 | -0.78749500 |
| H | -3.72917400 | -4.52104100 | -1.34362300 |
| C | -5.37596900 | -3.65012800 | -0.26684200 |
| H | -6.03753100 | -4.49700600 | -0.40300800 |
| C | -5.77240400 | -2.50542200 | 0.43768200  |
| H | -6.76519300 | -2.43938100 | 0.87230000  |
| C | -4.88752200 | -1.45896400 | 0.58660000  |
| H | -5.16454800 | -0.56590200 | 1.13783300  |
| C | -3.59217300 | -1.56862300 | 0.01138900  |
| C | -0.73765500 | 0.55263500  | -0.15308500 |
| C | -1.41182700 | 1.87237100  | 0.13002000  |
| C | -2.39194000 | 2.39058400  | -0.72894500 |
| H | -2.66531500 | 1.82708000  | -1.61429900 |
| C | -2.99831000 | 3.61666200  | -0.46598200 |
| H | -3.74219300 | 4.00825900  | -1.15244400 |
| C | -2.64822000 | 4.34193100  | 0.67225900  |
| H | -3.12038200 | 5.29688000  | 0.87838600  |
| C | -1.68421900 | 3.83256400  | 1.54099500  |
| H | -1.40482800 | 4.38998300  | 2.42929200  |
| C | -1.06916800 | 2.61230800  | 1.26881000  |
| H | -0.30269000 | 2.22235700  | 1.92885000  |
| C | 1.18522000  | 2.87746200  | -1.44453200 |
| H | 0.74726900  | 3.57759800  | -0.72666400 |
| H | 0.45500700  | 2.74659000  | -2.24972800 |
| H | 2.08958800  | 3.32596900  | -1.86078800 |
| C | 1.55049000  | 1.56523200  | -0.81296800 |
| C | 0.69785800  | 0.54923300  | -0.28627000 |
| C | 1.57473300  | -0.52398600 | 0.13160300  |
| C | 4.11825300  | -0.61693000 | 0.01568200  |
| C | 5.29319100  | 0.06852600  | -0.35209400 |
| H | 5.19202200  | 1.05244800  | -0.78690900 |
| C | 6.53907200  | -0.51491400 | -0.15826300 |
| H | 7.42925100  | 0.03483500  | -0.45133400 |
| C | 6.65856300  | -1.78658700 | 0.40301200  |
| H | 7.63430800  | -2.23761400 | 0.55203200  |
| C | 5.49550800  | -2.46489100 | 0.76706600  |
| H | 5.56286500  | -3.45676000 | 1.20492100  |
| C | 4.23704300  | -1.90185300 | 0.58284200  |
| H | 3.33413200  | -2.42264600 | 0.86453500  |
| N | -3.20912500 | -2.65846900 | -0.67269400 |
| N | -2.73414400 | -0.51408500 | 0.14527300  |
| N | -1.40769300 | -0.56584200 | -0.21081000 |
| N | 2.82581300  | 1.24282800  | -0.77365300 |
| N | 2.87759800  | -0.01442700 | -0.18592900 |
| O | 1.36758300  | -1.60757400 | 0.67722200  |
| H | -3.08535900 | 0.29898000  | 0.63865800  |

## H<sub>2</sub>L<sup>2</sup> (tautomer I)

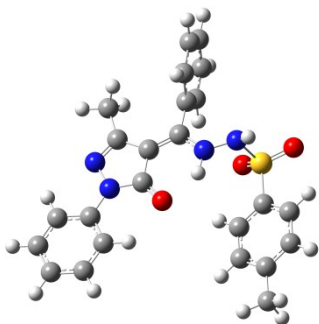

|   |             |             |             |
|---|-------------|-------------|-------------|
| C | -4.15349400 | -0.16963400 | -0.01831600 |
| C | -4.23492400 | 1.18087400  | -0.38463400 |
| H | -3.34614100 | 1.69971400  | -0.70894400 |
| C | -5.46360700 | 1.83274900  | -0.32580000 |
| H | -5.51695500 | 2.87732300  | -0.61279700 |
| C | -6.61245700 | 1.16535300  | 0.09036500  |
| H | -7.56400200 | 1.68269600  | 0.13206000  |
| C | -6.52234100 | -0.17742300 | 0.45148300  |
| H | -7.40667900 | -0.71372500 | 0.77761300  |
| C | -5.30557900 | -0.84750800 | 0.40068700  |
| H | -5.22872000 | -1.88843200 | 0.67809800  |
| C | -1.66270100 | -0.39966600 | -0.39125200 |
| C | -0.79131300 | -1.56839000 | -0.24775200 |
| C | -1.67402100 | -2.64533200 | 0.15299100  |
| C | -1.35990500 | -4.07910700 | 0.43824400  |
| H | -2.28516800 | -4.59777400 | 0.69001500  |
| H | -0.65928900 | -4.17626600 | 1.27110000  |
| H | -0.90072400 | -4.56729300 | -0.42498200 |
| C | 0.57101000  | -1.50815200 | -0.45716800 |
| C | 1.48244100  | -2.67548600 | -0.28269800 |
| C | 2.02529100  | -2.97685100 | 0.96811000  |
| H | 1.81872700  | -2.32969400 | 1.81071500  |
| C | 2.85584700  | -4.08501500 | 1.11378300  |
| H | 3.28062400  | -4.31069300 | 2.08506600  |
| C | 3.14796300  | -4.89372600 | 0.01760800  |
| H | 3.79494900  | -5.75552100 | 0.13533100  |
| C | 2.61225600  | -4.58948400 | -1.23198400 |
| H | 2.83918500  | -5.21318700 | -2.08909900 |
| C | 1.78324900  | -3.48131800 | -1.38439100 |
| H | 1.36348400  | -3.24440800 | -2.35565900 |
| C | 2.36902300  | 2.45121500  | 0.28723700  |
| C | 1.11826800  | 2.70920200  | 0.84622200  |
| H | 0.60180100  | 1.94484300  | 1.41062900  |
| C | 0.55279000  | 3.96801900  | 0.67528900  |
| H | -0.42457800 | 4.16781500  | 1.09992000  |
| C | 1.21767600  | 4.97208500  | -0.03666700 |
| C | 2.47589100  | 4.68448900  | -0.58116700 |
| H | 3.00943200  | 5.45290300  | -1.13025400 |
| C | 3.05635000  | 3.43127900  | -0.42929200 |
| H | 4.03684700  | 3.21746700  | -0.83599000 |
| C | 0.60730000  | 6.34256000  | -0.18846100 |
| H | -0.48330300 | 6.29302600  | -0.19900300 |
| H | 0.93781300  | 6.82657000  | -1.10972400 |
| H | 0.89900400  | 6.98958800  | 0.64584200  |
| N | -2.92162900 | -0.86761300 | -0.06391900 |
| N | -2.90100500 | -2.22637700 | 0.25674700  |
| N | 1.10200300  | -0.33668300 | -0.89788900 |
| H | 0.43859800  | 0.44561200  | -0.99405400 |
| N | 2.46812800  | -0.11580700 | -0.87668000 |
| O | -1.34970100 | 0.75453100  | -0.72559200 |
| O | 2.55190000  | 0.19384900  | 1.64297100  |
| O | 4.51372400  | 0.90647400  | 0.15257800  |
| S | 3.09018400  | 0.81900800  | 0.44389900  |
| H | 2.82221300  | 0.23743800  | -1.76035900 |

## H<sub>2</sub>L<sup>2</sup> (tautomer II)

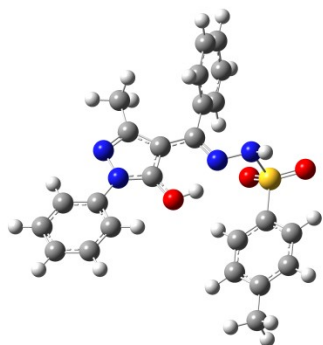

|   |             |             |             |
|---|-------------|-------------|-------------|
| C | -4.13518700 | -0.32659200 | -0.04186600 |
| C | -4.29446700 | 0.89196400  | -0.70948000 |
| H | -3.45946400 | 1.34765000  | -1.21926400 |
| C | -5.54086900 | 1.51274800  | -0.70902900 |
| H | -5.65822200 | 2.45684500  | -1.22893800 |
| C | -6.62748200 | 0.93269500  | -0.06054900 |
| H | -7.59453700 | 1.42183500  | -0.06819000 |
| C | -6.45941900 | -0.28537700 | 0.59536100  |
| H | -7.29698300 | -0.75036500 | 1.10289400  |
| C | -5.22169400 | -0.91741400 | 0.61094200  |
| H | -5.07885500 | -1.86454500 | 1.11026800  |
| C | -1.64128000 | -0.54781200 | -0.31053100 |
| C | -0.73754500 | -1.60795100 | -0.12005300 |
| C | -1.56722800 | -2.68998600 | 0.33105200  |
| C | -1.19664200 | -4.07942600 | 0.74397600  |
| H | -2.07752600 | -4.56831600 | 1.16051700  |
| H | -0.40263500 | -4.07179300 | 1.49407300  |
| H | -0.83390100 | -4.66871000 | -0.10101100 |
| C | 0.67794000  | -1.44463500 | -0.32819000 |
| C | 1.59404200  | -2.62170500 | -0.24905200 |
| C | 2.52394000  | -2.75920600 | 0.78575400  |
| H | 2.60773500  | -1.98571800 | 1.53834500  |
| C | 3.34952700  | -3.87965800 | 0.82959400  |
| H | 4.06714100  | -3.98150000 | 1.63559600  |
| C | 3.26814700  | -4.85597200 | -0.16135900 |
| H | 3.91984700  | -5.72168500 | -0.12639500 |
| C | 2.35172900  | -4.71368000 | -1.20076200 |
| H | 2.28900600  | -5.46506300 | -1.97978100 |
| C | 1.51043500  | -3.60506700 | -1.24009400 |
| H | 0.79292900  | -3.49678300 | -2.04610500 |
| C | 2.30193800  | 2.55395800  | 0.23337700  |
| C | 1.17682600  | 2.74416400  | 1.03328600  |
| H | 0.86948700  | 1.97271700  | 1.72650000  |
| C | 0.47729800  | 3.94256700  | 0.93989200  |
| H | -0.40067600 | 4.09227500  | 1.55881400  |
| C | 0.88513200  | 4.95429600  | 0.06312800  |
| C | 2.02138100  | 4.73596400  | -0.72520800 |
| H | 2.35762900  | 5.51175400  | -1.40487300 |
| C | 2.73193800  | 3.54334800  | -0.64942500 |
| H | 3.62222700  | 3.38676300  | -1.24580200 |
| C | 0.13805800  | 6.26270700  | -0.00466500 |
| H | -0.92586700 | 6.12499900  | 0.19951000  |
| H | 0.24073400  | 6.73082100  | -0.98584300 |
| H | 0.52571000  | 6.96821100  | 0.73818400  |
| N | -2.88172900 | -0.99999300 | -0.01978800 |
| N | -2.82907000 | -2.32526700 | 0.38847400  |
| N | 1.06049400  | -0.22927700 | -0.63242900 |
| N | 2.45702500  | -0.05614400 | -0.83845000 |
| O | -1.36597300 | 0.68761400  | -0.68695300 |
| O | 2.94841200  | 0.40215100  | 1.61176700  |
| O | 4.53321500  | 1.21063600  | -0.22747400 |
| S | 3.19286300  | 0.99768400  | 0.30419600  |
| H | 2.61745000  | 0.33854000  | -1.76305500 |
| H | -0.35840700 | 0.69110700  | -0.76255500 |



[HL<sup>2-</sup>]

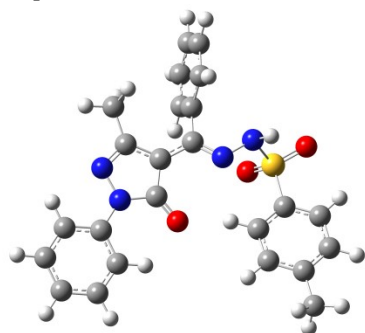

|   |             |             |             |
|---|-------------|-------------|-------------|
| C | 4.18599500  | -0.84309200 | 0.06144900  |
| C | 3.94473900  | -2.22161600 | 0.21485600  |
| H | 2.92402400  | -2.57112400 | 0.19672000  |
| C | 5.01225100  | -3.09737900 | 0.38605100  |
| H | 4.80367600  | -4.15674300 | 0.50299000  |
| C | 6.32958300  | -2.64228900 | 0.41078800  |
| H | 7.15332300  | -3.33546900 | 0.54551600  |
| C | 6.56611400  | -1.27596200 | 0.25992100  |
| H | 7.58338900  | -0.89581100 | 0.27660100  |
| C | 5.51609400  | -0.38276900 | 0.08756500  |
| H | 5.69099000  | 0.67668000  | -0.03029800 |
| C | 1.74584000  | -0.16507200 | -0.18542300 |
| C | 1.18718000  | 1.16159200  | -0.37209200 |
| C | 2.31403200  | 2.04941400  | -0.39738300 |
| C | 2.36835400  | 3.53505800  | -0.60326700 |
| H | 3.41670300  | 3.83724100  | -0.64209600 |
| H | 1.87155200  | 4.08121300  | 0.20246500  |
| H | 1.87984600  | 3.83216900  | -1.53568800 |
| C | -0.20677500 | 1.45328800  | -0.49392000 |
| C | -0.68115200 | 2.85256000  | -0.20770400 |
| C | -0.71159100 | 3.33237600  | 1.10344400  |
| H | -0.40874200 | 2.67654800  | 1.91049300  |
| C | -1.14824400 | 4.62775700  | 1.37164100  |
| H | -1.17871600 | 4.98274500  | 2.39654600  |
| C | -1.54940100 | 5.46372600  | 0.33123900  |
| H | -1.88512100 | 6.47416600  | 0.54056900  |
| C | -1.52451800 | 4.99035300  | -0.97949700 |
| H | -1.84040900 | 5.63201300  | -1.79586800 |
| C | -1.10116300 | 3.69069300  | -1.24409600 |
| H | -1.09052500 | 3.31852100  | -2.26275900 |
| C | -3.05335700 | -1.71190200 | 0.19585800  |
| C | -1.78438400 | -2.29649800 | 0.18301600  |
| H | -0.88240600 | -1.71059400 | 0.32254800  |
| C | -1.68781400 | -3.65972000 | -0.07922600 |
| H | -0.70019200 | -4.10837900 | -0.11144300 |
| C | -2.82082300 | -4.44831800 | -0.30923300 |
| C | -4.07581900 | -3.83255200 | -0.28969400 |
| H | -4.96794900 | -4.42436700 | -0.47183900 |
| C | -4.19893800 | -2.46724300 | -0.04547900 |
| H | -5.16685700 | -1.98203000 | -0.04074700 |
| C | -2.68701700 | -5.93231500 | -0.55645600 |
| H | -1.85075300 | -6.14881800 | -1.22682300 |
| H | -3.59522200 | -6.34753100 | -1.00032000 |
| H | -2.49926600 | -6.47159500 | 0.37886400  |
| N | 3.14566200  | 0.07450600  | -0.11567600 |
| N | 3.45728500  | 1.42026100  | -0.26303800 |
| N | -1.03477000 | 0.50138600  | -0.85170800 |
| N | -2.42188300 | 0.88778700  | -0.73780800 |
| O | 1.22932300  | -1.27938400 | -0.05259600 |
| O | -2.57619200 | 0.38263200  | 1.75989400  |
| O | -4.66297200 | 0.37761600  | 0.30129600  |
| S | -3.24624200 | 0.05613500  | 0.50618200  |
| H | -2.89790800 | 0.62797200  | -1.59964300 |

[HL<sup>3-</sup>]

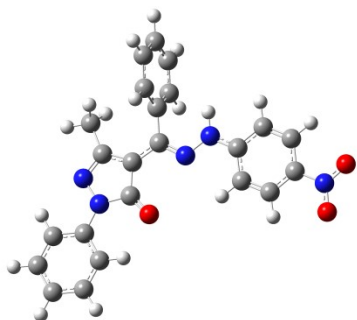

|   |             |             |             |
|---|-------------|-------------|-------------|
| C | -2.87099600 | 1.50351000  | -0.18435300 |
| C | -1.65087800 | 0.75870200  | -0.08125700 |
| C | -2.05389300 | -0.63675800 | 0.00094200  |
| N | -3.93658300 | 0.73527400  | -0.16825700 |
| N | -3.47728600 | -0.56769500 | -0.04909800 |
| C | -4.40572200 | -1.61184000 | 0.00348000  |
| C | -5.78161400 | -1.31811000 | -0.04049500 |
| C | -4.00357800 | -2.95764400 | 0.10056300  |
| C | -6.72080200 | -2.34068800 | 0.01051900  |
| H | -6.08051300 | -0.28265100 | -0.11530200 |
| C | -4.96236500 | -3.96467300 | 0.14994100  |
| H | -2.94789800 | -3.17976100 | 0.13605100  |
| C | -6.32528000 | -3.67471600 | 0.10609900  |
| H | -7.77662800 | -2.08838800 | -0.02508300 |
| H | -4.63075200 | -4.99602900 | 0.22433500  |
| H | -7.06263300 | -4.46962300 | 0.14543300  |
| C | -3.10283300 | 2.98023300  | -0.32993500 |
| H | -4.17670400 | 3.14564000  | -0.43439000 |
| H | -2.74448600 | 3.54523900  | 0.53511800  |
| H | -2.59769100 | 3.39008700  | -1.20940800 |
| O | -1.40988400 | -1.68023100 | 0.10199700  |
| C | -0.29526000 | 1.20963600  | -0.06084700 |
| C | -0.00503500 | 2.68626800  | 0.02071900  |
| C | -0.02049500 | 3.34571500  | 1.25534400  |
| C | 0.34760300  | 3.41317700  | -1.12283200 |
| C | 0.28854700  | 4.70175000  | 1.34227700  |
| H | -0.28683800 | 2.78676600  | 2.14551900  |
| C | 0.65320000  | 4.77066100  | -1.03823600 |
| H | 0.36903000  | 2.90787800  | -2.08234000 |
| C | 0.62225600  | 5.41919300  | 0.19477000  |
| H | 0.26611800  | 5.19884700  | 2.30637700  |
| H | 0.91306200  | 5.32171200  | -1.93597600 |
| H | 0.85925800  | 6.47562100  | 0.26149100  |
| N | 0.69094000  | 0.34802400  | -0.08969700 |
| N | 1.97076000  | 0.82448000  | -0.01455200 |
| H | 2.14966900  | 1.82220500  | 0.04752100  |
| C | 3.02903700  | -0.02499300 | -0.01123900 |
| C | 4.34775000  | 0.49562200  | 0.04866500  |
| C | 2.84752200  | -1.43171600 | -0.06755800 |
| C | 5.43617600  | -0.34679500 | 0.05016900  |
| H | 4.49488900  | 1.57032800  | 0.09239600  |
| C | 3.94426800  | -2.26465300 | -0.06593900 |
| H | 1.83618200  | -1.81372700 | -0.10519900 |
| C | 5.24319800  | -1.73462200 | -0.00851100 |
| H | 6.44562300  | 0.03765500  | 0.09489100  |
| H | 3.82388300  | -3.33856000 | -0.10664300 |
| N | 6.38341900  | -2.61257400 | -0.00775500 |
| O | 6.19060200  | -3.83287900 | -0.06202200 |
| O | 7.51464000  | -2.11055900 | 0.04715100  |

## H<sub>2</sub>L<sup>4</sup> (tautomer I)

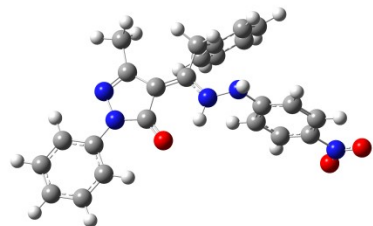

|   |             |             |             |
|---|-------------|-------------|-------------|
| C | 2.81499000  | 1.90791300  | -0.32586400 |
| C | 1.80311000  | 0.94045900  | -0.70200000 |
| C | 2.45578200  | -0.36156000 | -0.54214500 |
| N | 3.92197300  | 1.31493000  | 0.01606900  |
| N | 3.73301900  | -0.05827000 | -0.10574500 |
| C | 4.80258500  | -0.93248700 | 0.21644700  |
| C | 6.01654800  | -0.38959500 | 0.65583400  |
| C | 4.66094400  | -2.32174800 | 0.10104700  |
| C | 7.07486500  | -1.23230500 | 0.97545700  |
| H | 6.11191300  | 0.68295800  | 0.73938500  |
| C | 5.73352500  | -3.14732100 | 0.42687700  |
| H | 3.72455000  | -2.73715600 | -0.23769800 |
| C | 6.94326700  | -2.61496600 | 0.86436400  |
| H | 8.00983000  | -0.80004100 | 1.31452100  |
| H | 5.61436700  | -4.22125800 | 0.33511800  |
| H | 7.77165000  | -3.26727800 | 1.11540700  |
| C | 2.76809300  | 3.40502800  | -0.29563400 |
| H | 3.71893900  | 3.77276700  | 0.09025200  |
| H | 2.62194800  | 3.82393700  | -1.29634800 |
| H | 1.96501300  | 3.78055000  | 0.34458000  |
| O | 1.97851600  | -1.48894300 | -0.74613900 |
| N | -0.17982900 | -0.08751900 | -1.41181100 |
| N | -1.46223100 | -0.09033500 | -1.94164300 |
| H | -1.46728700 | -0.29201500 | -2.93506800 |
| C | -2.48303300 | -0.73248400 | -1.22614700 |
| C | -3.65584400 | -1.09048900 | -1.91244400 |
| C | -2.38148000 | -0.97917400 | 0.14939000  |
| C | -4.71088500 | -1.67610100 | -1.23638900 |
| H | -3.73620100 | -0.90354100 | -2.97804600 |
| C | -3.43880200 | -1.56708600 | 0.82666700  |
| H | -1.47998300 | -0.70846100 | 0.68086100  |
| C | -4.59475100 | -1.90901500 | 0.13240500  |
| H | -5.62081700 | -1.95926800 | -1.74652200 |
| H | -3.38133500 | -1.76516500 | 1.88776500  |
| C | 0.49020200  | 1.05352500  | -1.12949400 |
| C | -0.24551900 | 2.36238400  | -1.27470200 |
| H | -0.80537000 | 2.34904800  | -2.21101600 |
| H | 0.48566300  | 3.16566500  | -1.34817400 |
| C | -1.21253300 | 2.65067400  | -0.13077700 |
| C | -2.51668700 | 3.06760900  | -0.40707000 |
| C | -0.80816100 | 2.54947000  | 1.20457100  |
| C | -3.39734800 | 3.38375700  | 0.62488000  |
| H | -2.84734000 | 3.14381800  | -1.43752600 |
| C | -1.68851300 | 2.86237100  | 2.23773400  |
| H | 0.19673600  | 2.21794100  | 1.44213700  |
| C | -2.98569200 | 3.28172200  | 1.95126100  |
| H | -4.40639500 | 3.70424700  | 0.39153800  |
| H | -1.35928100 | 2.77757800  | 3.26721400  |
| H | -3.67106800 | 3.52341700  | 2.75536800  |
| N | -5.71386900 | -2.52972900 | 0.85293100  |
| O | -5.58109100 | -2.72226500 | 2.05576800  |
| O | -6.71642900 | -2.81724200 | 0.20831600  |
| H | 0.34506200  | -0.96717100 | -1.29153100 |

## H<sub>2</sub>L<sup>4</sup> (tautomer II)

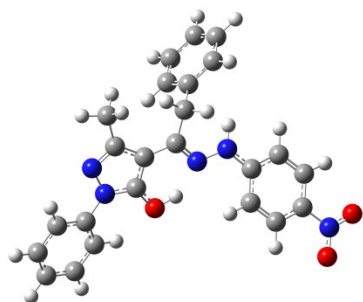

|   |             |             |             |
|---|-------------|-------------|-------------|
| C | 3.01283400  | 1.47956900  | -0.95031700 |
| C | 1.77070100  | 0.82019800  | -0.66771600 |
| C | 2.16794100  | -0.43298300 | -0.17928700 |
| N | 4.04010600  | 0.70618900  | -0.66319500 |
| N | 3.52118400  | -0.47862000 | -0.18018800 |
| C | 4.40713600  | -1.53064000 | 0.19022800  |
| C | 5.73329500  | -1.47009600 | -0.24893000 |
| C | 3.97724400  | -2.59867200 | 0.98348900  |
| C | 6.62098800  | -2.47934200 | 0.10456600  |
| H | 6.04712000  | -0.63011500 | -0.85142000 |
| C | 4.87931800  | -3.60424400 | 1.32138700  |
| H | 2.95605600  | -2.64604200 | 1.32913300  |
| C | 6.20081900  | -3.55302900 | 0.88748000  |
| H | 7.64770900  | -2.42531700 | -0.23922700 |
| H | 4.53968700  | -4.43049600 | 1.93546400  |
| H | 6.89629300  | -4.33906400 | 1.15748700  |
| C | 3.29060000  | 2.84867000  | -1.49293400 |
| H | 4.36993000  | 3.00050400  | -1.51316100 |
| H | 2.91205400  | 2.96706100  | -2.51280300 |
| H | 2.84530500  | 3.63356800  | -0.87515500 |
| O | 1.39620200  | -1.42948100 | 0.23362700  |
| H | 0.46938600  | -1.07702700 | 0.13111000  |
| N | -0.48960800 | 0.27988600  | -0.44139500 |
| N | -1.82543700 | 0.60086700  | -0.46537400 |
| H | -2.08085300 | 1.53406000  | -0.16187900 |
| C | -2.77858700 | -0.38775300 | -0.32022200 |
| C | -4.09035700 | -0.01864600 | 0.03990100  |
| C | -2.48821600 | -1.74277600 | -0.56599900 |
| C | -5.08083200 | -0.97418500 | 0.15800000  |
| H | -4.32118500 | 1.02374400  | 0.23166700  |
| C | -3.48183200 | -2.69857900 | -0.44001000 |
| H | -1.49175600 | -2.03180200 | -0.86870400 |
| C | -4.77113800 | -2.31354100 | -0.07945500 |
| H | -6.09010300 | -0.70732700 | 0.43841400  |
| H | -3.27718300 | -3.74393000 | -0.62500800 |
| C | 0.37640100  | 1.19511100  | -0.77864800 |
| C | -0.05485200 | 2.56405100  | -1.26014100 |
| H | -0.82204600 | 2.41229700  | -2.02750800 |
| H | 0.78291100  | 3.05820900  | -1.75083800 |
| C | -0.61665100 | 3.48035400  | -0.17822600 |
| C | -1.72136600 | 4.29431400  | -0.45452700 |
| C | -0.02886400 | 3.55653300  | 1.08991100  |
| C | -2.22400000 | 5.16709100  | 0.50879700  |
| H | -2.18754000 | 4.24868500  | -1.43395400 |
| C | -0.53118000 | 4.42791200  | 2.05331500  |
| H | 0.82309200  | 2.92861600  | 1.32676200  |
| C | -1.62929100 | 5.23623900  | 1.76618700  |
| H | -3.07948900 | 5.79097200  | 0.27572200  |
| H | -0.06367200 | 4.47407700  | 3.03033800  |
| H | -2.01972900 | 5.91265800  | 2.51766900  |
| N | -5.81850600 | -3.32735700 | 0.04944000  |
| O | -5.51461600 | -4.49636700 | -0.16695100 |
| O | -6.94293900 | -2.95083000 | 0.36704800  |

[HL<sup>4-</sup>]

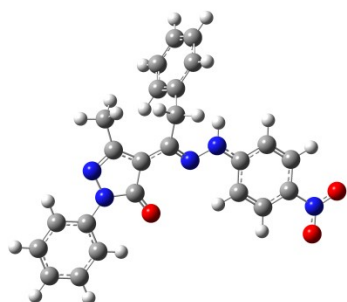

|   |             |             |             |
|---|-------------|-------------|-------------|
| C | 2.90180100  | 1.50229300  | -0.61814500 |
| C | 1.72110100  | 0.69400800  | -0.52887800 |
| C | 2.19806800  | -0.64658900 | -0.22194700 |
| N | 4.00450500  | 0.82019700  | -0.40108700 |
| N | 3.61462800  | -0.48815300 | -0.17040400 |
| C | 4.59432000  | -1.45199500 | 0.08892100  |
| C | 5.94978200  | -1.07323700 | 0.11131700  |
| C | 4.26396300  | -2.79953000 | 0.32808900  |
| C | 6.93884100  | -2.01513400 | 0.36626900  |
| H | 6.19384000  | -0.03727500 | -0.07401900 |
| C | 5.27170400  | -3.72493100 | 0.58092400  |
| H | 3.22377000  | -3.08708600 | 0.31026300  |
| C | 6.61433600  | -3.35060000 | 0.60395100  |
| H | 7.97761200  | -1.69804500 | 0.37871400  |
| H | 4.99512900  | -4.75911900 | 0.76304800  |
| H | 7.39052900  | -4.08224200 | 0.80248800  |
| C | 3.07821200  | 2.97180100  | -0.88706400 |
| H | 4.12319800  | 3.22453600  | -0.69908600 |
| H | 2.85507800  | 3.23587300  | -1.92750500 |
| H | 2.44941500  | 3.59595600  | -0.24518000 |
| O | 1.61364300  | -1.71585900 | -0.05047700 |
| N | -0.57435600 | 0.15773100  | -0.34642200 |
| N | -1.89235600 | 0.50351800  | -0.50439000 |
| H | -2.17655900 | 1.47768300  | -0.50880300 |
| C | -2.86689000 | -0.42792300 | -0.31832100 |
| C | -4.22840900 | -0.03283300 | -0.32665600 |
| C | -2.54876900 | -1.79804200 | -0.13626600 |
| C | -5.23071500 | -0.96306700 | -0.16627900 |
| H | -4.47883900 | 1.01507400  | -0.45985200 |
| C | -3.55965500 | -2.72030900 | 0.02500100  |
| H | -1.50439600 | -2.08085500 | -0.12166600 |
| C | -4.90319200 | -2.31489500 | 0.00868200  |
| H | -6.27260500 | -0.67453800 | -0.16942300 |
| H | -3.33557600 | -3.76858200 | 0.16750100  |
| C | 0.33643900  | 1.03729100  | -0.67337800 |
| C | -0.06371400 | 2.39910300  | -1.23611700 |
| H | -0.79304600 | 2.23252700  | -2.03853900 |
| H | 0.79664800  | 2.86030300  | -1.71724900 |
| C | -0.65305000 | 3.38846200  | -0.23951900 |
| C | -1.55207400 | 4.37220000  | -0.67182700 |
| C | -0.29413100 | 3.36751200  | 1.11312700  |
| C | -2.07154600 | 5.31229100  | 0.21507600  |
| H | -1.84597400 | 4.40001300  | -1.71726100 |
| C | -0.81302000 | 4.30668600  | 2.00231000  |
| H | 0.38688500  | 2.60166100  | 1.46691300  |
| C | -1.70144700 | 5.28365300  | 1.55818500  |
| H | -2.76744600 | 6.06425100  | -0.14224700 |
| H | -0.52398600 | 4.27005700  | 3.04718900  |
| H | -2.10706700 | 6.01130900  | 2.25274800  |
| N | -5.95418900 | -3.28605500 | 0.17566200  |
| O | -5.64373100 | -4.47293300 | 0.32654900  |
| O | -7.12815800 | -2.89239100 | 0.16064200  |

## H<sub>2</sub>L<sup>5</sup> (tautomer I)

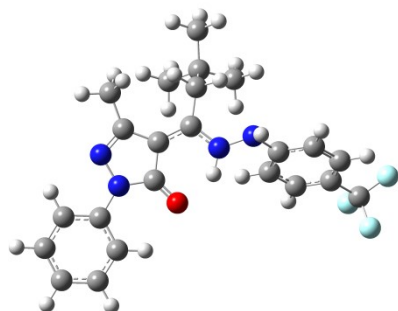

|   |             |             |             |
|---|-------------|-------------|-------------|
| C | 3.37087700  | 1.65464400  | -0.23550200 |
| C | 2.07834100  | 1.02564600  | -0.42166100 |
| C | 2.35809300  | -0.40992500 | -0.36370600 |
| N | 4.30582500  | 0.76283200  | -0.06741100 |
| N | 3.71710000  | -0.49437100 | -0.12198000 |
| C | 4.52888700  | -1.64451700 | 0.04756100  |
| C | 5.89556300  | -1.48015300 | 0.30685200  |
| C | 3.98626300  | -2.93367400 | -0.03778800 |
| C | 6.70613500  | -2.59645700 | 0.47753900  |
| H | 6.30073600  | -0.48096200 | 0.36958000  |
| C | 4.81604100  | -4.03785000 | 0.13686200  |
| H | 2.93322500  | -3.05741500 | -0.23734100 |
| C | 6.17532800  | -3.88211000 | 0.39445100  |
| H | 7.76261700  | -2.45573300 | 0.67781200  |
| H | 4.38650200  | -5.03129600 | 0.06892700  |
| H | 6.81206000  | -4.74889500 | 0.52872700  |
| C | 3.78598200  | 3.09305000  | -0.30261200 |
| H | 4.86509800  | 3.14423800  | -0.15668900 |
| H | 3.55295100  | 3.52956200  | -1.27903300 |
| H | 3.30467600  | 3.70796000  | 0.46014400  |
| O | 1.56264900  | -1.35620300 | -0.49978800 |
| N | -0.16128100 | 0.59325600  | -0.92657300 |
| N | -1.41318100 | 0.92895900  | -1.43197200 |
| H | -1.40313000 | 0.99552000  | -2.44511800 |
| C | -2.51686000 | 0.20082900  | -0.94849300 |
| C | -3.73007300 | 0.29614700  | -1.64739900 |
| C | -2.45538900 | -0.56951200 | 0.21698600  |
| C | -4.85642000 | -0.36355600 | -1.18629600 |
| H | -3.78732300 | 0.89856800  | -2.54794000 |
| C | -3.59277200 | -1.22734300 | 0.67368500  |
| H | -1.52302700 | -0.66395600 | 0.75721100  |
| C | -4.79689800 | -1.12839600 | -0.01807300 |
| H | -5.79030600 | -0.27689400 | -1.72751300 |
| H | -3.53813100 | -1.81943100 | 1.57830900  |
| C | 0.79509300  | 1.51253800  | -0.65913400 |
| C | 0.43685600  | 2.97723700  | -0.64141500 |
| H | -0.28424800 | 3.17766900  | -1.43676700 |
| H | 1.33809200  | 3.53961600  | -0.87872000 |
| C | -0.15991600 | 3.56351000  | 0.69121700  |
| C | -1.59594300 | 3.07015100  | 0.93465600  |
| C | 0.69939600  | 3.20771900  | 1.91664300  |
| C | -0.18685200 | 5.09450200  | 0.51435100  |
| H | -2.24759700 | 3.29089800  | 0.08610200  |
| H | -1.63403100 | 1.99505100  | 1.11567900  |
| H | -2.01063900 | 3.56553300  | 1.81756100  |
| H | 1.71818600  | 3.59116600  | 1.83116500  |
| H | 0.25861000  | 3.64853100  | 2.81530600  |
| H | 0.75939400  | 2.12803200  | 2.07213900  |
| H | -0.61885300 | 5.57330900  | 1.39736500  |
| H | 0.81950200  | 5.50006500  | 0.37326900  |
| H | -0.79161400 | 5.38415100  | -0.35057000 |
| C | -6.00924100 | -1.87918100 | 0.44576400  |
| F | -7.15158500 | -1.19689800 | 0.19884100  |
| F | -6.13772500 | -3.07599300 | -0.17823100 |
| F | -5.97470600 | -2.13715800 | 1.77124000  |
| H | 0.15800300  | -0.38975000 | -0.94932600 |

## H<sub>2</sub>L<sup>5</sup> (tautomer II)

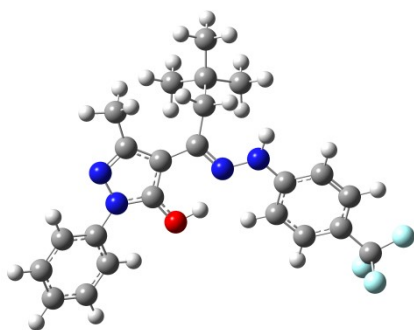

|   |             |             |             |
|---|-------------|-------------|-------------|
| C | 3.50878800  | 1.32090900  | -0.57764800 |
| C | 2.13888500  | 0.93063600  | -0.39869800 |
| C | 2.22629300  | -0.44559100 | -0.15087200 |
| N | 4.32435700  | 0.29490800  | -0.42575200 |
| N | 3.53447300  | -0.79983000 | -0.15366400 |
| C | 4.14015500  | -2.07374400 | 0.03251000  |
| C | 5.45684700  | -2.25692900 | -0.40131300 |
| C | 3.45019400  | -3.12401400 | 0.64539600  |
| C | 6.07438100  | -3.48921500 | -0.22320900 |
| H | 5.97543900  | -1.42814400 | -0.86102200 |
| C | 4.08243200  | -4.35391500 | 0.80839300  |
| H | 2.43557100  | -2.98450400 | 0.98599600  |
| C | 5.39222100  | -4.54550100 | 0.37801800  |
| H | 7.09568000  | -3.62331200 | -0.56140500 |
| H | 3.54146200  | -5.16479700 | 1.28285400  |
| H | 5.87716900  | -5.50553700 | 0.51113100  |
| C | 4.12540800  | 2.63672200  | -0.94784700 |
| H | 5.20568300  | 2.50227700  | -1.00766700 |
| H | 3.77289100  | 2.98762600  | -1.92266300 |
| H | 3.91934300  | 3.42097700  | -0.21636300 |
| O | 1.23377800  | -1.31256800 | 0.01536100  |
| H | 0.41987800  | -0.77032200 | -0.17375800 |
| N | -0.18836500 | 0.84387100  | -0.42621700 |
| N | -1.44598000 | 1.33793800  | -0.57285000 |
| H | -1.56984900 | 2.26047600  | -0.96478600 |
| C | -2.56623400 | 0.54323900  | -0.41208800 |
| C | -3.80647000 | 1.02029900  | -0.87216000 |
| C | -2.51481500 | -0.70509800 | 0.23147600  |
| C | -4.95681200 | 0.26766100  | -0.70394600 |
| H | -3.86151700 | 1.98344300  | -1.36893300 |
| C | -3.67206300 | -1.45295400 | 0.38603000  |
| H | -1.58059200 | -1.06981600 | 0.63400200  |
| C | -4.90060100 | -0.97847400 | -0.07664900 |
| H | -5.90492000 | 0.64886700  | -1.06111000 |
| H | -3.62201400 | -2.40972200 | 0.89133700  |
| C | 0.85721000  | 1.62322300  | -0.47631600 |
| C | 0.79517400  | 3.13032500  | -0.63473300 |
| H | 0.00854200  | 3.40312600  | -1.35022700 |
| H | 1.72407300  | 3.45439200  | -1.10133100 |
| C | 0.59133200  | 3.99055400  | 0.66362700  |
| C | -0.83669000 | 3.85958800  | 1.22404600  |
| C | 1.58771700  | 3.58896100  | 1.76563900  |
| C | 0.83113500  | 5.46067400  | 0.26794600  |
| H | -1.58867300 | 4.16100200  | 0.48681700  |
| H | -1.06060900 | 2.84116300  | 1.54527400  |
| H | -0.95538100 | 4.51554000  | 2.09132800  |
| H | 2.62415400  | 3.71440300  | 1.44570600  |
| H | 1.43823500  | 4.21695200  | 2.64861000  |
| H | 1.45492900  | 2.54836800  | 2.06985300  |
| H | 0.68214000  | 6.11940100  | 1.12812000  |
| H | 1.85028700  | 5.61484600  | -0.09861900 |
| H | 0.13941500  | 5.77961700  | -0.51839600 |
| C | -6.12812100 | -1.82404300 | 0.06175300  |
| F | -7.26475900 | -1.09508400 | -0.01545200 |
| F | -6.21272800 | -2.77163800 | -0.90637600 |
| F | -6.15819900 | -2.48815200 | 1.24134300  |

[HL<sup>5-</sup>]

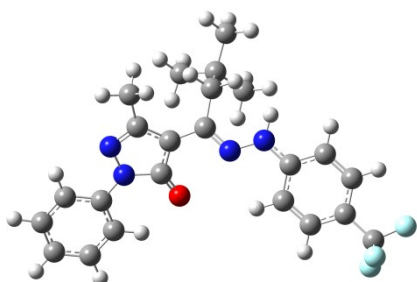

|   |             |             |             |
|---|-------------|-------------|-------------|
| C | 3.18960200  | 1.16419100  | -1.25276500 |
| C | 1.95689800  | 0.80869000  | -0.63164100 |
| C | 2.18227100  | -0.48777700 | -0.03152300 |
| N | 4.12840900  | 0.25205900  | -1.09882800 |
| N | 3.55423200  | -0.75382900 | -0.33696900 |
| C | 4.32483500  | -1.86540900 | 0.00876800  |
| C | 5.66912900  | -1.93422900 | -0.40539400 |
| C | 3.79672000  | -2.92791400 | 0.76811800  |
| C | 6.45353100  | -3.03095600 | -0.07068300 |
| H | 6.06476700  | -1.11407400 | -0.98684300 |
| C | 4.60172300  | -4.01554500 | 1.09124700  |
| H | 2.76595500  | -2.87003000 | 1.08417600  |
| C | 5.93251600  | -4.08462800 | 0.68052000  |
| H | 7.48735600  | -3.06027100 | -0.40307500 |
| H | 4.17411100  | -4.82415400 | 1.67689900  |
| H | 6.54941200  | -4.93900100 | 0.93924900  |
| C | 3.53719500  | 2.35573300  | -2.10001800 |
| H | 4.50432500  | 2.17159000  | -2.57174600 |
| H | 2.79359800  | 2.52621400  | -2.88578200 |
| H | 3.61808300  | 3.28055100  | -1.51743100 |
| O | 1.45967100  | -1.23434100 | 0.63654900  |
| N | -0.38817800 | 0.78849900  | -0.55941400 |
| N | -1.61472900 | 1.37983500  | -0.42428000 |
| H | -1.72696900 | 2.38393500  | -0.48927900 |
| C | -2.74159300 | 0.61278100  | -0.32387100 |
| C | -4.01553100 | 1.22144900  | -0.34855600 |
| C | -2.66254800 | -0.79120300 | -0.17280000 |
| C | -5.16450200 | 0.45918100  | -0.23277400 |
| H | -4.09241200 | 2.29881700  | -0.46104000 |
| C | -3.82089400 | -1.53631500 | -0.06120900 |
| H | -1.68154500 | -1.24530400 | -0.13162700 |
| C | -5.08580000 | -0.92952500 | -0.08666500 |
| H | -6.13350500 | 0.94304600  | -0.25020500 |
| H | -3.74710800 | -2.61059200 | 0.06453200  |
| C | 0.69318500  | 1.51324900  | -0.57495500 |
| C | 0.68372800  | 3.03597200  | -0.48139200 |
| H | -0.23666700 | 3.44624300  | -0.91884600 |
| H | 1.48831300  | 3.43111500  | -1.10206400 |
| C | 0.85214600  | 3.65077800  | 0.94922900  |
| C | -0.18701500 | 3.08550700  | 1.93434600  |
| C | 2.26155600  | 3.37074700  | 1.50281600  |
| C | 0.65890900  | 5.17460500  | 0.82668200  |
| H | -1.20978500 | 3.32501900  | 1.62732100  |
| H | -0.10572000 | 1.99934900  | 2.01430600  |
| H | -0.03381400 | 3.51382000  | 2.93058800  |
| H | 3.03449900  | 3.78684400  | 0.84965200  |
| H | 2.37529700  | 3.82951400  | 2.49143700  |
| H | 2.44791500  | 2.30011900  | 1.59342000  |
| H | 0.78579800  | 5.66347800  | 1.79838900  |
| H | 1.38738300  | 5.61112300  | 0.13534900  |
| H | -0.34298700 | 5.42078300  | 0.45799600  |
| C | -6.31653900 | -1.75990300 | -0.01675000 |
| F | -7.41305100 | -1.04534600 | 0.35152600  |
| F | -6.64403100 | -2.34341200 | -1.20863000 |
| F | -6.20946500 | -2.78860000 | 0.86535800  |



## Complex 1

|    |             |             |             |
|----|-------------|-------------|-------------|
| Zn | 0.00028200  | 0.00020400  | 0.90691600  |
| C  | 0.57818800  | -3.69213300 | -2.47957900 |
| C  | -0.58015600 | 3.69319100  | -2.47854000 |
| C  | -0.78853800 | -3.40724700 | -2.34986900 |
| H  | -1.10029700 | -2.56303400 | -1.75465100 |
| C  | 0.78685900  | 3.41028100  | -2.34749000 |
| H  | 1.09929100  | 2.56710400  | -1.75116600 |
| C  | -1.72334000 | -4.21552500 | -2.99172100 |
| H  | -2.77913400 | -3.98318200 | -2.88561100 |
| C  | 1.72107000  | 4.21915600  | -2.98944600 |
| H  | 2.77709400  | 3.98836500  | -2.88223600 |
| C  | -1.32643000 | -5.30274500 | -3.76541200 |
| H  | -2.06385400 | -5.92437100 | -4.26313500 |
| C  | 1.32330400  | 5.30506600  | -3.76453700 |
| H  | 2.06027900  | 5.92717300  | -4.26232500 |
| C  | 0.03388800  | -5.57703000 | -3.89474400 |
| H  | 0.36530700  | -6.41788900 | -4.49655000 |
| C  | -0.03727800 | 5.57741300  | -3.89516000 |
| H  | -0.36936200 | 6.41724100  | -4.49803400 |
| C  | 0.98285600  | -4.78437200 | -3.26026600 |
| H  | 2.03912200  | -4.98975100 | -3.36058500 |
| C  | -0.98567600 | 4.78412100  | -3.26062000 |
| H  | -2.04213100 | 4.98804200  | -3.36189800 |
| C  | 1.42216300  | -1.88321700 | -0.92243900 |
| C  | -1.42288800 | 1.88370600  | -0.92134300 |
| C  | 2.76037200  | -1.46035800 | -0.61562300 |
| C  | -2.76080600 | 1.45990300  | -0.61455100 |
| C  | 3.60463200  | -2.30986600 | -1.41475900 |
| C  | -3.60564000 | 2.30875800  | -1.41378300 |
| C  | 5.09792000  | -2.37489400 | -1.52815500 |
| H  | 5.35701600  | -3.19112500 | -2.20349000 |
| H  | 5.57681300  | -2.55797200 | -0.56276300 |
| H  | 5.52382200  | -1.45042300 | -1.92573500 |
| C  | -5.09896300 | 2.37259600  | -1.52738700 |
| H  | -5.35860200 | 3.18840200  | -2.20302700 |
| H  | -5.57814200 | 2.55561600  | -0.56212800 |
| H  | -5.52407200 | 1.44765400  | -1.92472100 |
| C  | 3.09558200  | -0.41365500 | 0.28786800  |
| C  | -3.09530100 | 0.41317700  | 0.28917400  |
| C  | 4.52482200  | 0.03400800  | 0.41044700  |
| C  | -4.52435200 | -0.03492700 | 0.41238100  |
| C  | 5.04852800  | 0.96101600  | -0.49762400 |
| H  | 4.42397900  | 1.32555200  | -1.30675800 |
| C  | -5.04795800 | -0.96270800 | -0.49495000 |
| H  | -4.42347900 | -1.32758600 | -1.30398400 |
| C  | 6.36531500  | 1.40112200  | -0.37569900 |
| H  | 6.76202100  | 2.11523100  | -1.08999100 |
| C  | -6.36457800 | -1.40317200 | -0.37243100 |
| H  | -6.76121200 | -2.11788200 | -1.08615900 |
| C  | 7.17136400  | 0.92070100  | 0.65444300  |
| H  | 8.19840400  | 1.25896100  | 0.74496100  |
| C  | -7.17053400 | -0.92234300 | 0.65758400  |
| H  | -8.19744500 | -1.26086800 | 0.74856800  |
| C  | 6.65428500  | 0.00382800  | 1.56810400  |
| H  | 7.27805200  | -0.37544400 | 2.37111400  |
| C  | -6.65353300 | -0.00470900 | 1.57053500  |
| H  | -7.27723300 | 0.37485500  | 2.37346000  |
| C  | 5.33634300  | -0.43259200 | 1.45083900  |
| H  | 4.93629200  | -1.14946100 | 2.16096200  |
| C  | -5.33577200 | 0.43207700  | 1.45267200  |
| H  | -4.93577100 | 1.14951700  | 2.16224100  |
| C  | 1.61169700  | 1.93630600  | 2.52127800  |
| C  | -1.60982900 | -1.93633500 | 2.52195000  |
| C  | 1.99186600  | 3.03247800  | 3.32632000  |
| H  | 3.03526000  | 3.32081700  | 3.39843000  |
| C  | -1.98938200 | -3.03250700 | 3.32728300  |
| H  | -3.03273100 | -3.32079700 | 3.40023100  |
| C  | 1.00975000  | 3.71671200  | 4.00842500  |
| H  | 1.27714500  | 4.56492500  | 4.63018300  |
| C  | -1.00675600 | -3.71673800 | 4.00864700  |
| H  | -1.27367700 | -4.56495000 | 4.63061100  |
| C  | -0.33038200 | 3.31657900  | 3.89190900  |
| H  | -1.12517100 | 3.83690500  | 4.41150400  |
| C  | 0.33328300  | -3.31657000 | 3.89115600  |
| H  | 1.12846000  | -3.83688600 | 4.41016600  |
| C  | -0.60939400 | 2.23649000  | 3.07795300  |
| H  | -1.62530600 | 1.88404900  | 2.93250000  |

|   |             |             |             |
|---|-------------|-------------|-------------|
| C | 0.61167200  | -2.23645000 | 3.07703500  |
| H | 1.62745800  | -1.88394700 | 2.93086800  |
| N | 1.56747400  | -2.90153500 | -1.84834100 |
| N | -1.56888500 | 2.90196000  | -1.84720800 |
| N | 2.90187700  | -3.15370700 | -2.12782700 |
| N | -2.90346000 | 3.15308400  | -2.12683200 |
| N | 2.16773400  | 0.18525800  | 1.00648800  |
| N | -2.16698100 | -0.18535900 | 1.00750000  |
| N | 2.55317100  | 1.20903000  | 1.84983100  |
| N | -2.55187400 | -1.20899100 | 1.85132900  |
| N | 0.33027700  | 1.55352200  | 2.40450300  |
| N | -0.32850700 | -1.55352500 | 2.40423900  |
| O | 0.30998500  | -1.47426200 | -0.48762900 |
| O | -0.31044500 | 1.47551200  | -0.48650100 |
| H | -3.49545200 | -1.56497500 | 1.78548300  |
| H | 3.49705700  | 1.56431200  | 1.78419200  |

## Complex 2

|    |             |             |             |
|----|-------------|-------------|-------------|
| Zn | 0.00000000  | 0.00000000  | 0.75120800  |
| S  | -0.54782600 | 2.40894800  | 2.83534500  |
| O  | -0.86358300 | -1.18293500 | -0.65675000 |
| O  | 0.53568800  | 1.54906500  | 2.33226700  |
| N  | -1.84646300 | 0.96409500  | 1.07986200  |
| N  | -2.45374800 | -1.49133000 | -2.33890500 |
| O  | -0.73874400 | 2.66972700  | 4.25027500  |
| N  | -1.93604900 | 1.57503800  | 2.33930500  |
| H  | -2.79631400 | 2.08568400  | 2.52358600  |
| N  | -3.69770700 | -0.99847300 | -2.70018200 |
| C  | -1.96945100 | -0.88158400 | -1.20283900 |
| C  | -2.97982400 | 0.05798200  | -0.81635200 |
| C  | -2.94400700 | 0.86114400  | 0.35965600  |
| C  | -1.87837300 | -2.53411400 | -3.10352400 |
| C  | -4.01260000 | -0.08914700 | -1.81147100 |
| C  | -2.71442100 | -3.33620500 | -3.89010900 |
| H  | -3.77672900 | -3.13343700 | -3.89677700 |
| C  | -0.46667500 | 3.97837200  | 1.98062600  |
| C  | -0.44852200 | 6.42801900  | 0.64483500  |
| C  | -0.49673500 | -2.76320100 | -3.10262500 |
| H  | 0.15131000  | -2.13512700 | -2.50956600 |
| C  | -2.17214400 | -4.36026000 | -4.65815400 |
| H  | -2.83082100 | -4.97286200 | -5.26588200 |
| C  | -0.00033900 | 4.03494800  | 0.66690600  |
| H  | 0.36771000  | 3.14746500  | 0.16374100  |
| C  | -0.92429100 | 5.12088300  | 2.63881500  |
| H  | -1.26429000 | 5.05761000  | 3.66540900  |
| C  | -0.79906000 | -4.60218900 | -4.65292100 |
| H  | -0.37956900 | -5.40009700 | -5.25715700 |
| C  | -0.90760700 | 6.33638100  | 1.96495500  |
| H  | -1.25193100 | 7.22981700  | 2.47725500  |
| C  | 0.02925100  | -3.79668900 | -3.87452500 |
| H  | 1.10275100  | -3.95875600 | -3.87497000 |
| C  | 0.00000000  | 5.26276000  | 0.01200300  |
| H  | 0.36242700  | 5.30662800  | -1.01029400 |
| C  | -5.30737700 | 0.64442900  | -1.98726100 |
| H  | -5.77289900 | 0.30554000  | -2.91338700 |
| H  | -5.15889300 | 1.72547600  | -2.04927900 |
| H  | -6.00241100 | 0.46367200  | -1.16395000 |
| C  | -0.40287200 | 7.75676700  | -0.06631000 |
| H  | -1.18067800 | 8.43458300  | 0.29269900  |
| H  | -0.52500000 | 7.63891500  | -1.14504000 |
| H  | 0.56042200  | 8.25190600  | 0.09755900  |
| C  | -4.19519900 | 1.55284600  | 0.81747900  |
| C  | -5.17948000 | 0.83892800  | 1.50914300  |
| H  | -5.03700600 | -0.21984000 | 1.69768900  |
| C  | -6.33417600 | 1.48224700  | 1.94823300  |
| H  | -7.09222800 | 0.92036200  | 2.48380200  |
| C  | -6.51601700 | 2.84170800  | 1.69969500  |
| H  | -7.41810800 | 3.34036300  | 2.03861000  |
| C  | -5.53541100 | 3.55988500  | 1.01834600  |
| H  | -5.67153300 | 4.61855600  | 0.82331900  |
| C  | -4.37558900 | 2.92104000  | 0.58374000  |
| H  | -3.61165300 | 3.47938100  | 0.05204600  |
| S  | 0.54782600  | -2.40894800 | 2.83534500  |
| O  | 0.86358300  | 1.18293500  | -0.65675000 |
| O  | -0.53568800 | -1.54906500 | 2.33226700  |
| N  | 1.84646300  | -0.96409500 | 1.07986200  |
| N  | 2.45374800  | 1.49133000  | -2.33890500 |

|   |             |             |             |
|---|-------------|-------------|-------------|
| O | 0.73874400  | -2.66972700 | 4.25027500  |
| N | 1.93604900  | -1.57503800 | 2.33930500  |
| H | 2.79631400  | -2.08568400 | 2.52358600  |
| N | 3.69770700  | 0.99847300  | -2.70018200 |
| C | 1.96945100  | 0.88158400  | -1.20283900 |
| C | 2.97982400  | -0.05798200 | -0.81635200 |
| C | 2.94400700  | -0.86114400 | 0.35965600  |
| C | 1.87837300  | 2.53411400  | -3.10352400 |
| C | 4.01260000  | 0.08914700  | -1.81147100 |
| C | 2.71442100  | 3.33620500  | -3.89010900 |
| H | 3.77672900  | 3.13343700  | -3.89677700 |
| C | 0.46667500  | -3.97837200 | 1.98062600  |
| C | 0.44852200  | -6.42801900 | 0.64483500  |
| C | 0.49673500  | 2.76320100  | -3.10262500 |
| H | -0.15131000 | 2.13512700  | -2.50956600 |
| C | 2.17214400  | 4.36026000  | -4.65815400 |
| H | 2.83082100  | 4.97286200  | -5.26588200 |
| C | 0.00033900  | -4.03494800 | 0.66690600  |
| H | -0.36771000 | -3.14746500 | 0.16374100  |
| C | 0.92429100  | -5.12088300 | 2.63881500  |
| H | 1.26429000  | -5.05761000 | 3.66540900  |
| C | 0.79906000  | 4.60218900  | -4.65292100 |
| H | 0.37956900  | 5.40009700  | -5.25715700 |
| C | 0.90760700  | -6.33638100 | 1.96495500  |
| H | 1.25193100  | -7.22981700 | 2.47725500  |
| C | -0.02925100 | 3.79668900  | -3.87452500 |
| H | -1.10275100 | 3.95875600  | -3.87497000 |
| C | 0.00000000  | -5.26276000 | 0.01200300  |
| H | -0.36242700 | -5.30662800 | -1.01029400 |
| C | 5.30737700  | -0.64442900 | -1.98726100 |
| H | 5.77289900  | -0.30554000 | -2.91338700 |
| H | 5.15889300  | -1.72547600 | -2.04927900 |
| H | 6.00241100  | -0.46367200 | -1.16395000 |
| C | 0.40287200  | -7.75676700 | -0.06631000 |
| H | 1.18067800  | -8.43458300 | 0.29269900  |
| H | 0.52500000  | -7.63891500 | -1.14504000 |
| H | -0.56042200 | -8.25190600 | 0.09755900  |
| C | 4.19519900  | -1.55284600 | 0.81747900  |
| C | 5.17948000  | -0.83892800 | 1.50914300  |
| H | 5.03700600  | 0.21984000  | 1.69768900  |
| C | 6.33417600  | -1.48224700 | 1.94823300  |
| H | 7.09222800  | -0.92036200 | 2.48380200  |
| C | 6.51601700  | -2.84170800 | 1.69969500  |
| H | 7.41810800  | -3.34036300 | 2.03861000  |
| C | 5.53541100  | -3.55988500 | 1.01834600  |
| H | 5.67153300  | -4.61855600 | 0.82331900  |
| C | 4.37558900  | -2.92104000 | 0.58374000  |
| H | 3.61165300  | -3.47938100 | 0.05204600  |

### Complex 3

|    |             |             |             |
|----|-------------|-------------|-------------|
| Zn | 0.00001800  | 0.00028900  | -0.00047100 |
| C  | -2.98060700 | -3.51729200 | 1.76522800  |
| C  | -3.05223900 | -2.62172500 | 2.83893700  |
| H  | -2.18616400 | -2.03135900 | 3.10413900  |
| C  | -4.23629600 | -2.51145400 | 3.56479100  |
| H  | -4.28396600 | -1.81839200 | 4.39875900  |
| C  | -5.34416900 | -3.29248700 | 3.24197900  |
| H  | -6.26135900 | -3.20523400 | 3.81471700  |
| C  | -5.25717100 | -4.19841700 | 2.18539400  |
| H  | -6.10873400 | -4.82128500 | 1.93144200  |
| C  | -4.08508100 | -4.31354600 | 1.44541100  |
| H  | -4.00445400 | -5.01970700 | 0.62971500  |
| C  | -0.86892500 | -2.66652500 | 0.71134700  |
| C  | 0.10058400  | -3.30688000 | -0.13783800 |
| C  | -0.40505900 | -4.65026500 | -0.31383400 |
| C  | 0.12286100  | -5.78866100 | -1.13212900 |
| H  | 1.03552500  | -6.21188900 | -0.70714600 |
| H  | 0.36184800  | -5.48214600 | -2.15297000 |
| H  | -0.63437400 | -6.57262600 | -1.16631600 |
| C  | 1.30131900  | -2.69084800 | -0.59946000 |
| C  | 3.68483300  | -0.65891000 | 0.17397000  |
| C  | 4.73968500  | 0.24678500  | -0.07965800 |
| H  | 4.76168600  | 0.79275700  | -1.01683300 |
| C  | 5.73636100  | 0.44534200  | 0.85373700  |
| H  | 6.54467500  | 1.13917700  | 0.66566200  |
| C  | 5.69968800  | -0.25257600 | 2.06465300  |
| C  | 4.66857900  | -1.14323500 | 2.34176100  |

|   |             |             |             |
|---|-------------|-------------|-------------|
| H | 4.66424200  | -1.67051700 | 3.28669200  |
| C | 3.66258800  | -1.34652600 | 1.40514000  |
| H | 2.87126900  | -2.05355500 | 1.61688600  |
| N | -1.79451900 | -3.63983400 | 1.00209700  |
| N | -1.52156500 | -4.83134400 | 0.34601300  |
| N | 1.47205600  | -1.39254900 | -0.43472400 |
| N | 2.73314700  | -0.86115700 | -0.81188300 |
| H | 2.58093200  | -0.04060600 | -1.38955600 |
| N | 6.75507900  | -0.03985400 | 3.05506000  |
| O | -0.94535900 | -1.46796000 | 1.12191100  |
| O | 6.68436600  | -0.66220900 | 4.11076700  |
| O | 7.65082600  | 0.75041700  | 2.77484000  |
| C | 2.98080400  | 3.51830100  | -1.76585000 |
| C | 3.05316100  | 2.62213000  | -2.83900800 |
| H | 2.18743400  | 2.03121700  | -3.10413000 |
| C | 4.23746200  | 2.51200500  | -3.56448600 |
| H | 4.28568700  | 1.81847900  | -4.39803700 |
| C | 5.34486400  | 3.29377800  | -3.24185000 |
| H | 6.26224700  | 3.20664300  | -3.81429800 |
| C | 5.25712900  | 4.20031300  | -2.18584800 |
| H | 6.10831000  | 4.82377000  | -1.93206100 |
| C | 4.08478400  | 4.31532200  | -1.44624900 |
| H | 4.00358000  | 5.02196000  | -0.63102200 |
| C | 0.86934900  | 2.66710600  | -0.71187900 |
| C | -0.10066800 | 3.30747400  | 0.13669100  |
| C | 0.40423000  | 4.65122900  | 0.31194800  |
| C | -0.12454700 | 5.78992300  | 1.12927100  |
| H | -1.03796500 | 6.21163100  | 0.70441000  |
| H | -0.36255700 | 5.48421900  | 2.15059200  |
| H | 0.63184100  | 6.57475600  | 1.16219500  |
| C | -1.30111900 | 2.69121900  | 0.59860100  |
| C | -3.68477200 | 0.65861900  | -0.17341300 |
| C | -4.73960600 | -0.24681200 | 0.08124200  |
| H | -4.76135200 | -0.79208300 | 1.01882800  |
| C | -5.73659000 | -0.44598900 | -0.85168800 |
| H | -6.54489900 | -1.13961500 | -0.66283000 |
| C | -5.70022700 | 0.25098400  | -2.06316100 |
| C | -4.66910600 | 1.14130200  | -2.34130500 |
| H | -4.66498600 | 1.66781000  | -3.28666900 |
| C | -3.66281400 | 1.34524700  | -1.40514300 |
| H | -2.87142200 | 2.05195200  | -1.61769600 |
| N | 1.79443200  | 3.64074500  | -1.00314300 |
| N | 1.52067400  | 4.83255900  | -0.34793600 |
| N | -1.47188500 | 1.39291300  | 0.43384300  |
| N | -2.73275200 | 0.86162400  | 0.81193500  |
| H | -2.58031600 | 0.04158600  | 1.39027100  |
| N | -6.75594400 | 0.03759000  | -3.05307800 |
| O | 0.94655500  | 1.46829600  | -1.12161900 |
| O | -6.68545700 | 0.65905400  | -4.10932500 |
| O | -7.65170600 | -0.75234600 | -2.77195500 |
| O | 1.15001700  | 0.72009600  | 1.77738300  |
| H | 1.94684700  | 0.22598800  | 2.01141400  |
| O | -1.15007700 | -0.72033500 | -1.77734700 |
| H | -1.94886100 | -0.22886900 | -2.01029500 |
| H | 1.34804100  | 1.66062600  | 1.84455600  |
| H | -1.34461100 | -1.66155300 | -1.84528400 |
| C | 2.36284600  | -3.51942500 | -1.25470300 |
| C | 2.60917600  | -3.37737700 | -2.62446700 |
| C | 3.11090000  | -4.43830200 | -0.51619800 |
| C | 3.57998700  | -4.15501700 | -3.24665200 |
| H | 2.03465700  | -2.65936200 | -3.20015200 |
| C | 4.09721600  | -5.20236800 | -1.13710300 |
| H | 2.92316600  | -4.55718600 | 0.54577700  |
| C | 4.32941800  | -5.06646500 | -2.50310700 |
| H | 3.75735700  | -4.04478100 | -4.31147600 |
| H | 4.68020300  | -5.90615400 | -0.55224600 |
| H | 5.09231700  | -5.66686300 | -2.98767700 |
| C | -2.36249600 | 3.51954800  | 1.25439500  |
| C | -3.11227700 | 4.43707600  | 0.51598400  |
| C | -2.60692900 | 3.37855400  | 2.62460300  |
| C | -4.09839400 | 5.20093800  | 1.13747300  |
| H | -2.92598900 | 4.55515700  | -0.54633400 |
| C | -3.57763100 | 4.15590300  | 3.24730200  |
| H | -2.03104100 | 2.66152400  | 3.20016900  |
| C | -4.32875100 | 5.06607300  | 2.50388900  |
| H | -4.68268800 | 5.90373200  | 0.55272900  |
| H | -3.75357900 | 4.04647700  | 4.31244700  |
| H | -5.09152900 | 5.66627600  | 2.98889200  |

Complex  $[Zn(HL^3)_2]$ , square planar,  $3'_{sqp}$

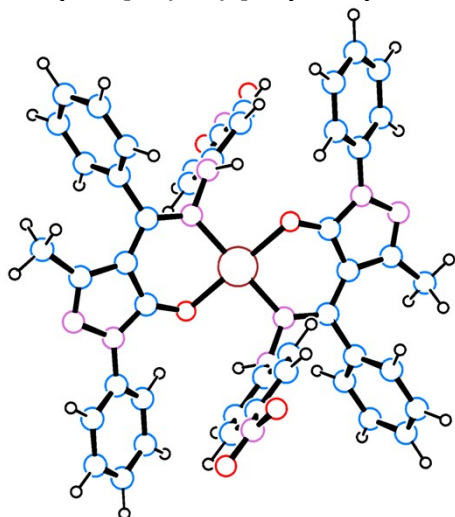

|    |             |             |             |
|----|-------------|-------------|-------------|
| Zn | 0.00000300  | 0.00030600  | -0.00024500 |
| C  | 3.40900600  | -3.00798300 | -1.88446700 |
| C  | 3.32699900  | -2.09947600 | -2.94501000 |
| H  | 2.37944300  | -1.63605200 | -3.18350800 |
| C  | 4.46498500  | -1.81562600 | -3.69698600 |
| H  | 4.39501900  | -1.11429100 | -4.52231800 |
| C  | 5.67810300  | -2.43816900 | -3.41044100 |
| H  | 6.55967700  | -2.21720200 | -4.00274000 |
| C  | 5.74541400  | -3.35936300 | -2.36578300 |
| H  | 6.68205700  | -3.85858200 | -2.14027700 |
| C  | 4.61983600  | -3.64587700 | -1.60047200 |
| H  | 4.65898400  | -4.36324100 | -0.79156400 |
| C  | 1.23907000  | -2.47790400 | -0.74641400 |
| C  | 0.37313000  | -3.26625100 | 0.08037700  |
| C  | 1.04739400  | -4.54026600 | 0.19581300  |
| C  | 0.68342600  | -5.75895900 | 0.98552600  |
| H  | -0.20036800 | -6.25968500 | 0.58523500  |
| H  | 0.46621800  | -5.51394900 | 2.02787300  |
| H  | 1.52014800  | -6.45741900 | 0.95538800  |
| C  | -0.87954100 | -2.81959400 | 0.56938100  |
| C  | -3.39854000 | -0.95253100 | -0.26782700 |
| C  | -4.59199600 | -0.24262600 | -0.02489300 |
| H  | -4.80131000 | 0.12854600  | 0.97256900  |
| C  | -5.49141900 | -0.01096700 | -1.04675800 |
| H  | -6.40698500 | 0.53741500  | -0.87116500 |
| C  | -5.21065900 | -0.48633600 | -2.32949000 |
| C  | -4.03625300 | -1.18224100 | -2.59328900 |
| H  | -3.84179600 | -1.53153100 | -3.59859600 |
| C  | -3.13194600 | -1.41696000 | -1.56697700 |
| H  | -2.21212000 | -1.94683700 | -1.77479700 |
| N  | 2.26907000  | -3.30552000 | -1.09674500 |
| N  | 2.16295500  | -4.54963900 | -0.48752800 |
| N  | -1.20177800 | -1.53434500 | 0.49439800  |
| N  | -2.54744300 | -1.20879400 | 0.80867200  |
| H  | -2.55331900 | -0.45273800 | 1.48397500  |
| N  | -6.16228400 | -0.23978100 | -3.41535500 |
| O  | 1.13708800  | -1.26056800 | -1.11689000 |
| O  | -5.88200000 | -0.66687700 | -4.53110700 |
| O  | -7.18628300 | 0.38060600  | -3.14807700 |
| C  | -3.40911300 | 3.00905200  | 1.88315500  |
| C  | -3.32746000 | 2.10063700  | 2.94380000  |
| H  | -2.37999900 | 1.63716900  | 3.18259600  |
| C  | -4.46567500 | 1.81691800  | 3.69547800  |
| H  | -4.39598700 | 1.11565300  | 4.52089300  |
| C  | -5.67867400 | 2.43950600  | 3.40852300  |
| H  | -6.56043000 | 2.21864700  | 4.00059100  |
| C  | -5.74563900 | 3.36060300  | 2.36375800  |
| H  | -6.68219400 | 3.85984300  | 2.13793200  |
| C  | -4.61982400 | 3.64698100  | 1.59874300  |
| H  | -4.65870000 | 4.36426600  | 0.78975200  |
| C  | -1.23896600 | 2.47869400  | 0.74565400  |
| C  | -0.37260700 | 3.26698900  | -0.08074900 |
| C  | -1.04658000 | 4.54115500  | -0.19621600 |
| C  | -0.68210700 | 5.75989500  | -0.98562300 |
| H  | 0.20175800  | 6.26028800  | -0.58507000 |

|   |             |             |             |
|---|-------------|-------------|-------------|
| H | -0.46477300 | 5.51502400  | -2.02797800 |
| H | -1.51863500 | 6.45858800  | -0.95551100 |
| C | 0.88013600  | 2.82015800  | -0.56940000 |
| C | 3.39840200  | 0.95207800  | 0.26834200  |
| C | 4.59175500  | 0.24193500  | 0.02558100  |
| H | 4.80140600  | -0.12878800 | -0.97197600 |
| C | 5.49062800  | 0.00945900  | 1.04774100  |
| H | 6.40610000  | -0.53912600 | 0.87228500  |
| C | 5.20942700  | 0.48424400  | 2.33059600  |
| C | 4.03513000  | 1.18040300  | 2.59421000  |
| H | 3.84032900  | 1.52925000  | 3.59960400  |
| C | 3.13137000  | 1.41594200  | 1.56760400  |
| H | 2.21162100  | 1.94601900  | 1.77525800  |
| N | -2.26892000 | 3.30645700  | 1.09575400  |
| N | -2.16235600 | 4.55065200  | 0.48677200  |
| N | 1.20213400  | 1.53485000  | -0.49443200 |
| N | 2.54782800  | 1.20910100  | -0.80838100 |
| H | 2.55377400  | 0.45336600  | -1.48404600 |
| N | 6.16045800  | 0.23679500  | 3.41677500  |
| O | -1.13733000 | 1.26129600  | 1.11601900  |
| O | 5.87978100  | 0.66337500  | 4.53262400  |
| O | 7.18437600  | -0.38378000 | 3.14964600  |
| C | -1.85427100 | -3.80406300 | 1.13326200  |
| C | -2.15295500 | -3.80162700 | 2.49955300  |
| C | -2.46428600 | -4.74269200 | 0.29862200  |
| C | -3.03953100 | -4.73645100 | 3.02354200  |
| H | -1.68334700 | -3.07282700 | 3.15174800  |
| C | -3.36917700 | -5.66398600 | 0.82202800  |
| H | -2.23538600 | -4.74914600 | -0.76179800 |
| C | -3.65346800 | -5.66646500 | 2.18504500  |
| H | -3.25700200 | -4.73513000 | 4.08658600  |
| H | -3.84793000 | -6.38112500 | 0.16355800  |
| H | -4.35162200 | -6.38934500 | 2.59402000  |
| C | 1.85523200  | 3.80451200  | -1.13285300 |
| C | 2.46531600  | 4.74277200  | -0.29784900 |
| C | 2.15418400  | 3.80234700  | -2.49908200 |
| C | 3.37054900  | 5.66396700  | -0.82083700 |
| H | 2.23619800  | 4.74901200  | 0.76252500  |
| C | 3.04110800  | 4.73707700  | -3.02265400 |
| H | 1.68451300  | 3.07384100  | -3.15156100 |
| C | 3.65511500  | 5.66672000  | -2.18379800 |
| H | 3.84935000  | 6.38081800  | -0.16209000 |
| H | 3.25879400  | 4.73597100  | -4.08565400 |
| H | 4.35353500  | 6.38952500  | -2.59244900 |

### Complex $[\text{Zn}(\text{HL}^3)_2]$ , distorted tetrahedral, $3'T_d$

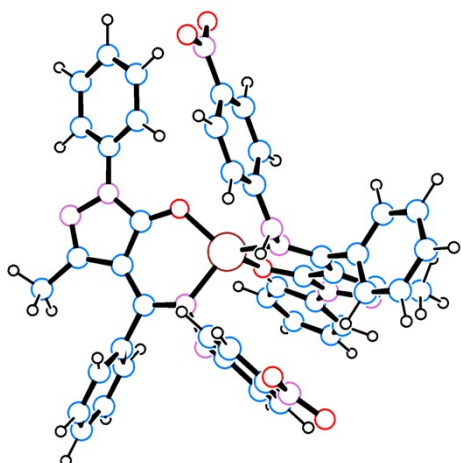

|    |             |             |             |
|----|-------------|-------------|-------------|
| Zn | -0.28223300 | -0.27823500 | -0.35380600 |
| C  | -5.17493600 | -0.36823700 | -0.43883600 |
| C  | -4.89431900 | 0.97126200  | -0.72329300 |
| H  | -3.94976000 | 1.40116200  | -0.42393300 |
| C  | -5.84144200 | 1.74343500  | -1.39185800 |
| H  | -5.62754100 | 2.78777500  | -1.59474100 |
| C  | -7.06157600 | 1.19228700  | -1.77647200 |
| H  | -7.79608800 | 1.80155800  | -2.29257500 |
| C  | -7.33465600 | -0.14285200 | -1.48489400 |
| H  | -8.28414400 | -0.58125600 | -1.77504000 |

|   |             |             |             |
|---|-------------|-------------|-------------|
| C | -6.39904100 | -0.92641000 | -0.81820900 |
| H | -6.60728600 | -1.95875400 | -0.57148800 |
| C | -2.88682200 | -1.07736000 | 0.33431500  |
| C | -2.45298100 | -2.15895800 | 1.18169700  |
| C | -3.67735900 | -2.84477000 | 1.53584200  |
| C | -3.90751300 | -4.04405000 | 2.40213200  |
| H | -3.51657800 | -3.90030700 | 3.41178100  |
| H | -3.42839400 | -4.93927200 | 1.99935600  |
| H | -4.98125700 | -4.22239200 | 2.46572300  |
| C | -1.11542700 | -2.42204400 | 1.54962100  |
| C | 1.97345100  | -1.08503200 | 2.15937100  |
| C | 3.37794500  | -1.20406600 | 2.08283400  |
| H | 3.81722500  | -2.00517900 | 1.49669200  |
| C | 4.19727700  | -0.30564800 | 2.73801800  |
| H | 5.27460600  | -0.38150800 | 2.67267600  |
| C | 3.62816200  | 0.72647500  | 3.48748500  |
| C | 2.24457400  | 0.84892600  | 3.59869800  |
| H | 1.83391500  | 1.64222200  | 4.21011100  |
| C | 1.41911500  | -0.04479800 | 2.93547100  |
| H | 0.34329500  | 0.03804300  | 3.02208800  |
| N | -4.24413900 | -1.18057600 | 0.26774500  |
| N | -4.71605200 | -2.26431600 | 0.99707800  |
| N | -0.13372300 | -1.61706600 | 1.15173200  |
| N | 1.17251900  | -2.00753000 | 1.52695100  |
| H | 1.62602400  | -2.59257000 | 0.83631400  |
| N | 4.49319600  | 1.70283500  | 4.14639700  |
| O | -2.21647300 | -0.17642600 | -0.27500500 |
| O | 3.96722700  | 2.52827700  | 4.88574600  |
| O | 5.69779500  | 1.64770900  | 3.91197800  |
| C | 2.15220900  | -2.80218400 | -3.85107300 |
| C | 0.88562500  | -3.39541500 | -3.78323800 |
| H | 0.07752000  | -2.88656600 | -3.28056400 |
| C | 0.68122300  | -4.64159500 | -4.37044100 |
| H | -0.30499500 | -5.09190800 | -4.31808700 |
| C | 1.71582200  | -5.30247900 | -5.02706900 |
| H | 1.54521600  | -6.27150400 | -5.48427400 |
| C | 2.97096400  | -4.70105200 | -5.09692100 |
| H | 3.78669400  | -5.19988100 | -5.61036000 |
| C | 3.19562200  | -3.45911500 | -4.51397400 |
| H | 4.16361300  | -2.98150100 | -4.57277500 |
| C | 1.68454700  | -0.84234900 | -2.33645500 |
| C | 2.42657700  | 0.36426300  | -2.07489400 |
| C | 3.59234300  | 0.25546400  | -2.92832200 |
| C | 4.74740700  | 1.18710500  | -3.12515200 |
| H | 4.42506800  | 2.16673500  | -3.48399100 |
| H | 5.30011000  | 1.35482700  | -2.19835100 |
| H | 5.42226400  | 0.75032800  | -3.86175100 |
| C | 2.04097600  | 1.38410200  | -1.17857400 |
| C | -0.51675300 | 3.10160800  | 0.22534300  |
| C | -0.99404700 | 3.90564500  | 1.28196200  |
| H | -0.45562900 | 3.93168300  | 2.22435300  |
| C | -2.13542900 | 4.66697500  | 1.12474300  |
| H | -2.50997400 | 5.28716000  | 1.92808800  |
| C | -2.82460500 | 4.62897800  | -0.08908400 |
| C | -2.36853900 | 3.84519200  | -1.14571400 |
| H | -2.91734500 | 3.83821000  | -2.07776800 |
| C | -1.21991100 | 3.08773800  | -0.99394700 |
| H | -0.86166700 | 2.48283100  | -1.81625700 |
| N | 2.40869300  | -1.53101600 | -3.26926600 |
| N | 3.57183500  | -0.85377800 | -3.61709700 |
| N | 0.91973300  | 1.29598500  | -0.45928600 |
| N | 0.65908300  | 2.39845500  | 0.38399200  |
| H | 0.99783100  | 2.27056700  | 1.32883500  |
| N | -4.04398800 | 5.41784700  | -0.25130000 |
| O | 0.59113100  | -1.25789600 | -1.83588600 |
| O | -4.67249700 | 5.29302400  | -1.30106000 |
| O | -4.37440700 | 6.15992000  | 0.66682100  |
| C | -0.78172000 | -3.62344100 | 2.38031500  |
| C | -0.59958400 | -4.86444300 | 1.76457900  |
| C | -0.63656500 | -3.51394800 | 3.76532100  |
| C | -0.27665200 | -5.98441200 | 2.52763300  |
| H | -0.71690100 | -4.95502200 | 0.68917100  |
| C | -0.31919200 | -4.63609000 | 4.52586600  |
| H | -0.77550400 | -2.55258400 | 4.24900300  |
| C | -0.13782300 | -5.87275300 | 3.90924300  |
| H | -0.13673300 | -6.94421100 | 2.04124400  |
| H | -0.21195200 | -4.54325400 | 5.60157200  |
| H | 0.10988900  | -6.74583900 | 4.50376600  |

|   |            |            |             |
|---|------------|------------|-------------|
| C | 2.91009300 | 2.59241700 | -1.00303800 |
| C | 2.71573300 | 3.72966800 | -1.78965800 |
| C | 3.91839900 | 2.58617000 | -0.03560500 |
| C | 3.52614000 | 4.84804700 | -1.60989500 |
| H | 1.93109900 | 3.74254200 | -2.53901900 |
| C | 4.72673300 | 3.70637600 | 0.14271900  |
| H | 4.07299700 | 1.70417000 | 0.57713500  |
| C | 4.53195600 | 4.83905800 | -0.64517900 |
| H | 3.36828000 | 5.72893000 | -2.22338000 |
| H | 5.50411300 | 3.69065400 | 0.89952200  |
| H | 5.16063900 | 5.71229300 | -0.50673600 |

### Complex mononuclear [Zn(HL<sup>4</sup>)<sub>2</sub>]

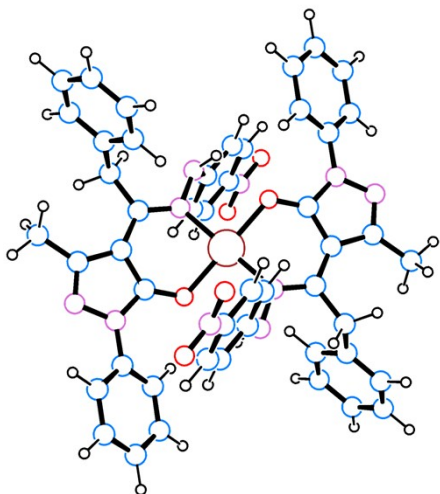

|    |             |             |             |
|----|-------------|-------------|-------------|
| Zn | 0.00001900  | 0.00107600  | -0.00082100 |
| C  | -4.06720900 | -0.54452000 | 2.70170600  |
| C  | -3.71991000 | 0.75029300  | 3.10087600  |
| H  | -2.67771700 | 1.02904000  | 3.17440800  |
| C  | -4.72245200 | 1.66445700  | 3.41767200  |
| H  | -4.44775000 | 2.66686100  | 3.72988800  |
| C  | -6.06451100 | 1.29521900  | 3.35398500  |
| H  | -6.84066200 | 2.00978600  | 3.60648200  |
| C  | -6.40090600 | -0.00452300 | 2.97701600  |
| H  | -7.44227400 | -0.30634400 | 2.93449200  |
| C  | -5.41101800 | -0.92493500 | 2.64845500  |
| H  | -5.65987500 | -1.93761800 | 2.36006300  |
| C  | -1.85978600 | -1.27266400 | 1.76161900  |
| C  | -1.25142800 | -2.56377900 | 1.62735900  |
| C  | -2.24117000 | -3.47860000 | 2.15398500  |
| C  | -2.22981900 | -4.97234900 | 2.26509400  |
| H  | -1.54508600 | -5.32027100 | 3.04516000  |
| H  | -1.93709200 | -5.45296500 | 1.32955200  |
| H  | -3.23143100 | -5.30840100 | 2.53394700  |
| C  | 0.07648100  | -2.77108700 | 1.17296100  |
| C  | 0.73325100  | -4.12824100 | 1.30824200  |
| H  | 0.33049700  | -4.63409800 | 2.18433100  |
| H  | 1.79790800  | -3.97643300 | 1.48948200  |
| C  | 0.57986800  | -5.03378500 | 0.09024400  |
| C  | 0.81348200  | -6.40568000 | 0.24496200  |
| H  | 1.06970600  | -6.79767200 | 1.22541100  |
| C  | 0.72317300  | -7.27389600 | -0.83835500 |
| H  | 0.90791000  | -8.33373800 | -0.69504100 |
| C  | 0.39112700  | -6.78562800 | -2.10126800 |
| H  | 0.31436600  | -7.46149400 | -2.94652600 |
| C  | 0.15403000  | -5.42466200 | -2.26667400 |
| H  | -0.11121000 | -5.03308900 | -3.24352800 |
| C  | 0.24994600  | -4.55554700 | -1.17981600 |
| H  | 0.05661600  | -3.49890800 | -1.33060800 |
| C  | 3.03293000  | -1.31547300 | 1.20426700  |
| C  | 4.35308000  | -1.12538700 | 0.74969400  |
| H  | 4.62923300  | -1.44707400 | -0.24853600 |
| C  | 5.29510100  | -0.52609200 | 1.56317100  |
| H  | 6.30919900  | -0.36951500 | 1.22134200  |
| C  | 4.92939000  | -0.10795000 | 2.84398500  |
| C  | 3.63118300  | -0.28127000 | 3.31076400  |



|   |             |             |             |
|---|-------------|-------------|-------------|
| H | 3.37653800  | 0.05703300  | 4.30630700  |
| C | 2.68376300  | -0.88496700 | 2.49562500  |
| H | 1.67184000  | -1.01614800 | 2.85529000  |
| N | -3.06764900 | -1.49081300 | 2.36317800  |
| N | -3.30560600 | -2.84134600 | 2.56949300  |
| N | 0.75070700  | -1.75766000 | 0.64086700  |
| N | 2.12860100  | -1.98609900 | 0.37565000  |
| H | 2.31505600  | -1.81590400 | -0.60618400 |
| N | 5.92657500  | 0.53188800  | 3.70682200  |
| O | -1.43340900 | -0.11862500 | 1.41858200  |
| O | 5.56949000  | 0.89424500  | 4.82321100  |
| O | 7.06169800  | 0.66917800  | 3.26318000  |
| C | 4.06881600  | 0.54907300  | -2.70066500 |
| C | 3.72222000  | -0.74534700 | -3.10167300 |
| H | 2.68015700  | -1.02417500 | -3.17684200 |
| C | 4.72529800  | -1.65901500 | -3.41819200 |
| H | 4.45115900  | -2.66112600 | -3.73184100 |
| C | 6.06721600  | -1.28962000 | -3.35239900 |
| H | 6.84380300  | -2.00378600 | -3.60469100 |
| C | 6.40293500  | 0.00975900  | -2.97357500 |
| H | 7.44420200  | 0.31168800  | -2.92939600 |
| C | 5.41247900  | 0.92965400  | -2.64527500 |
| H | 5.66080800  | 1.94206400  | -2.35546200 |
| C | 1.86042600  | 1.27595900  | -1.76191900 |
| C | 1.25130700  | 2.56674600  | -1.62790500 |
| C | 2.24102100  | 3.48217700  | -2.15350600 |
| C | 2.22902100  | 4.97595100  | -2.26422700 |
| H | 1.54479700  | 5.32374100  | -3.04479700 |
| H | 1.93524300  | 5.45617900  | -1.32881000 |
| H | 3.23069700  | 5.31257900  | -2.53211500 |
| C | -0.07707600 | 2.77327700  | -1.17458000 |
| C | -0.73452200 | 4.13003700  | -1.31023200 |
| H | -0.33118300 | 4.63634400  | -2.18579500 |
| H | -1.79889100 | 3.97746700  | -1.49259200 |
| C | -0.58308300 | 5.03546200  | -0.09189700 |
| C | -0.81824500 | 6.40710900  | -0.24647300 |
| H | -1.07430700 | 6.79899900  | -1.22700500 |
| C | -0.72970000 | 7.27520000  | 0.83708600  |
| H | -0.91563400 | 8.33484700  | 0.69387900  |
| C | -0.39789900 | 6.78706500  | 2.10011800  |
| H | -0.32252100 | 7.46284400  | 2.94557000  |
| C | -0.15925600 | 5.42635500  | 2.26538800  |
| H | 0.10582900  | 5.03489300  | 3.24233000  |
| C | -0.25339300 | 4.55735800  | 1.17827400  |
| H | -0.05883700 | 3.50092800  | 1.32898200  |
| C | -3.03267700 | 1.31334500  | -1.20563300 |
| C | -4.35257900 | 1.12246500  | -0.75068000 |
| H | -4.62925900 | 1.44612700  | 0.24676600  |
| C | -5.29366400 | 0.51980500  | -1.56275700 |
| H | -6.30755400 | 0.36256400  | -1.22061500 |
| C | -4.92725000 | 0.09906600  | -2.84251700 |
| C | -3.62927900 | 0.27317200  | -3.30966000 |
| H | -3.37410100 | -0.06711700 | -4.30438900 |
| C | -2.68280100 | 0.88025800  | -2.49594400 |
| H | -1.67108100 | 1.01224200  | -2.85589500 |
| N | 3.06862700  | 1.49484400  | -2.36249400 |
| N | 3.30611500  | 2.84554200  | -2.56828500 |
| N | -0.75115200 | 1.75942000  | -0.64310800 |
| N | -2.12928300 | 1.98715300  | -0.37865100 |
| H | -2.31584000 | 1.81960500  | 0.60362100  |
| N | -5.92342900 | -0.54437100 | -3.70385200 |
| O | 1.43434500  | 0.12164500  | -1.41939200 |
| O | -5.56567400 | -0.90908500 | -4.81925800 |
| O | -7.05843100 | -0.68205900 | -3.26003400 |

### Complex mononuclear [Zn(HL<sup>4</sup>)<sub>2</sub>(H<sub>2</sub>O)<sub>2</sub>]

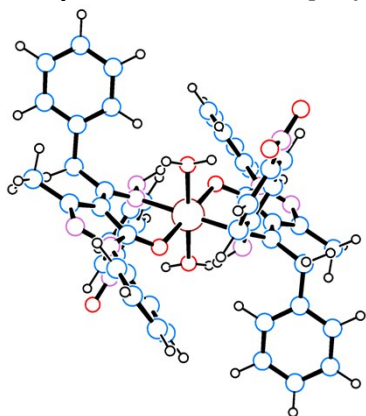

|    |             |             |             |
|----|-------------|-------------|-------------|
| Zn | 0.00000100  | 0.00005100  | -0.00010100 |
| C  | -3.67906800 | 1.66772600  | -2.83761700 |
| C  | -3.56176000 | 0.37386700  | -3.35834200 |
| H  | -2.59229300 | -0.10273200 | -3.39913500 |
| C  | -4.69538400 | -0.28251800 | -3.83294700 |
| H  | -4.59674400 | -1.28477900 | -4.23742700 |
| C  | -5.94086700 | 0.34158300  | -3.80740500 |
| H  | -6.81899800 | -0.17325600 | -4.18243700 |
| C  | -6.04536300 | 1.63984200  | -3.30904000 |
| H  | -7.00753300 | 2.14147600  | -3.29552700 |
| C  | -4.92424700 | 2.30432900  | -2.82273300 |
| H  | -4.99281900 | 3.31487200  | -2.44229300 |
| C  | -1.44422900 | 1.82917000  | -1.70595600 |
| C  | -0.62713600 | 2.96005800  | -1.35458300 |
| C  | -1.38857200 | 4.10270200  | -1.81168000 |
| C  | -1.09743600 | 5.57088200  | -1.73875800 |
| H  | -0.28414700 | 5.86146700  | -2.41162300 |
| H  | -0.82338000 | 5.89029100  | -0.73161400 |
| H  | -1.98971900 | 6.11534200  | -2.04878500 |
| C  | 0.68346400  | 2.86750700  | -0.79308900 |
| C  | 1.53447500  | 4.11074100  | -0.61564300 |
| H  | 1.34604700  | 4.79875700  | -1.43857300 |
| H  | 2.58465300  | 3.82402000  | -0.67924100 |
| C  | 1.32043600  | 4.83710200  | 0.70800800  |
| C  | 1.65689900  | 6.19338600  | 0.79431200  |
| H  | 2.02647500  | 6.71056300  | -0.08687800 |
| C  | 1.52627400  | 6.88929300  | 1.99249800  |
| H  | 1.79302000  | 7.94048400  | 2.03589800  |
| C  | 1.05024800  | 6.24002400  | 3.13022900  |
| H  | 0.94342700  | 6.78116600  | 4.06462900  |
| C  | 0.71143800  | 4.89219700  | 3.05568800  |
| H  | 0.33884400  | 4.37554100  | 3.93466200  |
| C  | 0.84757200  | 4.19417300  | 1.85556800  |
| H  | 0.57708200  | 3.14445200  | 1.82428900  |
| C  | 3.44712000  | 1.14875100  | -0.85604300 |
| C  | 4.64875800  | 0.61815800  | -0.33727400 |
| H  | 4.78331900  | 0.54878800  | 0.73679900  |
| C  | 5.64886100  | 0.18403400  | -1.18420200 |
| H  | 6.56960100  | -0.22776300 | -0.79323100 |
| C  | 5.46801500  | 0.26748400  | -2.56764500 |
| C  | 4.29334600  | 0.78346400  | -3.10332100 |
| H  | 4.18156300  | 0.84009300  | -4.17814700 |
| C  | 3.28366500  | 1.22169700  | -2.25496300 |
| H  | 2.37801500  | 1.64209300  | -2.67350700 |
| N  | -2.54651900 | 2.35415500  | -2.33520700 |
| N  | -2.51510200 | 3.73800100  | -2.37087600 |
| N  | 1.14336000  | 1.68284900  | -0.43448000 |
| N  | 2.48889500  | 1.62700500  | 0.02707500  |
| H  | 2.50719400  | 1.14748900  | 0.92218000  |
| N  | 6.52669600  | -0.19833400 | -3.46541000 |
| O  | -1.27900600 | 0.58600000  | -1.49818200 |
| O  | 6.32651200  | -0.12342800 | -4.67378800 |
| O  | 7.55269500  | -0.63884000 | -2.95774800 |
| C  | 3.67887400  | -1.66749100 | 2.83773500  |
| C  | 3.56144700  | -0.37365400 | 3.35849900  |
| H  | 2.59195900  | 0.10291000  | 3.39917800  |
| C  | 4.69497700  | 0.28274700  | 3.83330000  |
| H  | 4.59624100  | 1.28498700  | 4.23781200  |
| C  | 5.94048900  | -0.34130600 | 3.80791300  |

|   |             |             |             |
|---|-------------|-------------|-------------|
| H | 6.81854600  | 0.17354900  | 4.18309900  |
| C | 6.04510200  | -1.63953700 | 3.30950600  |
| H | 7.00729100  | -2.14113600 | 3.29610400  |
| C | 4.92407900  | -2.30404500 | 2.82300900  |
| H | 4.99274800  | -3.31456800 | 2.44253600  |
| C | 1.44414700  | -1.82900800 | 1.70583700  |
| C | 0.62716300  | -2.95993900 | 1.35432600  |
| C | 1.38863500  | -4.10255400 | 1.81143100  |
| C | 1.09760500  | -5.57074700 | 1.73838100  |
| H | 0.28426600  | -5.86144100 | 2.41113800  |
| H | 0.82366300  | -5.89010200 | 0.73118700  |
| H | 1.98989200  | -6.11517200 | 2.04845600  |
| C | -0.68345100 | -2.86742300 | 0.79285400  |
| C | -1.53444800 | -4.11066300 | 0.61539500  |
| H | -1.34608200 | -4.79866900 | 1.43834800  |
| H | -2.58462500 | -3.82391600 | 0.67890300  |
| C | -1.32031600 | -4.83702600 | -0.70823600 |
| C | -1.65639000 | -6.19340500 | -0.79449400 |
| H | -2.02571800 | -6.71068500 | 0.08674000  |
| C | -1.52570200 | -6.88928400 | -1.99269400 |
| H | -1.79214800 | -7.94055300 | -2.03605200 |
| C | -1.04999400 | -6.23988800 | -3.13048200 |
| H | -0.94312400 | -6.78100600 | -4.06488900 |
| C | -0.71155600 | -4.89196200 | -3.05598800 |
| H | -0.33920500 | -4.37520900 | -3.93500700 |
| C | -0.84776000 | -4.19397200 | -1.85586000 |
| H | -0.57754600 | -3.14417800 | -1.82460900 |
| C | -3.44713200 | -1.14882800 | 0.85604400  |
| C | -4.64874600 | -0.61803300 | 0.33743700  |
| H | -4.78332400 | -0.54837900 | -0.73661500 |
| C | -5.64881500 | -0.18409000 | 1.18450300  |
| H | -6.56954000 | 0.22786200  | 0.79366200  |
| C | -5.46795000 | -0.26793300 | 2.56791700  |
| C | -4.29329700 | -0.78412400 | 3.10343600  |
| H | -4.18151300 | -0.84106100 | 4.17824700  |
| C | -3.28365900 | -1.22217300 | 2.25494000  |
| H | -2.37802100 | -1.64273400 | 2.67334400  |
| N | 2.54642500  | -2.35395800 | 2.33515100  |
| N | 2.51510500  | -3.73780800 | 2.37071100  |
| N | -1.14336600 | -1.68276600 | 0.43425500  |
| N | -2.48894600 | -1.62693600 | -0.02721500 |
| H | -2.50730700 | -1.14725700 | -0.92223700 |
| N | -6.52658800 | 0.19769000  | 3.46582800  |
| O | 1.27885700  | -0.58584100 | 1.49813000  |
| O | -6.32637400 | 0.12243600  | 4.67418200  |
| O | -7.55254800 | 0.63845200  | 2.95831000  |
| O | 1.21153600  | -1.22610500 | -1.43964700 |
| H | 1.83842200  | -0.73559600 | -1.98745400 |
| O | -1.21148300 | 1.22612800  | 1.43954000  |
| H | -1.83789300 | 0.73537800  | 1.98767200  |
| H | 1.64335900  | -2.03154500 | -1.13348500 |
| H | -1.64405900 | 2.03106100  | 1.13310100  |

### Complex dinuclear $[Zn(HL^4)]_2$

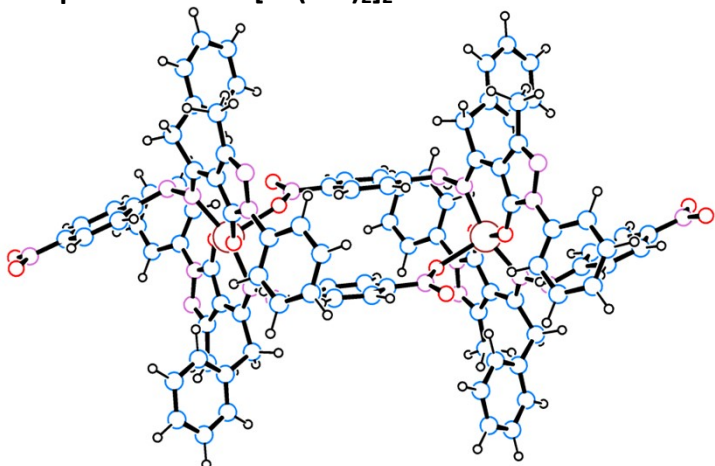

|   |            |             |            |
|---|------------|-------------|------------|
| C | 3.12591800 | -0.12420900 | 5.11623600 |
| C | 3.50423300 | 1.22272500  | 5.11422400 |

|   |             |             |             |
|---|-------------|-------------|-------------|
| H | 4.38676900  | 1.53152300  | 4.57003800  |
| C | 2.75746900  | 2.15036800  | 5.83779100  |
| H | 3.06261800  | 3.19202700  | 5.83971400  |
| C | 1.64507800  | 1.74554600  | 6.57356500  |
| H | 1.07259500  | 2.47006000  | 7.14309600  |
| C | 1.28773400  | 0.39753700  | 6.58918300  |
| H | 0.43281100  | 0.06858700  | 7.17105500  |
| C | 2.01949700  | -0.53731900 | 5.86433700  |
| H | 1.76040600  | -1.58796200 | 5.88051900  |
| C | 4.49677200  | -0.94012900 | 3.18143300  |
| C | 5.09423100  | -2.21007500 | 2.89829000  |
| C | 4.69837300  | -3.04354600 | 4.01062700  |
| C | 4.97267600  | -4.48774300 | 4.29990800  |
| H | 6.01885300  | -4.66024300 | 4.57229400  |
| H | 4.74338200  | -5.13038800 | 3.44782600  |
| H | 4.35846000  | -4.79413400 | 5.14709700  |
| C | 5.95465800  | -2.45959900 | 1.78925100  |
| C | 6.73555100  | -3.75746000 | 1.70061100  |
| H | 6.96987500  | -4.10609100 | 2.70501600  |
| H | 7.68789800  | -3.55788500 | 1.20879500  |
| C | 6.02532500  | -4.86766900 | 0.93351100  |
| C | 6.34354000  | -6.20024400 | 1.22109800  |
| H | 7.05823300  | -6.42268100 | 2.00862300  |
| C | 5.76071000  | -7.24546800 | 0.50992500  |
| H | 6.02317300  | -8.27113300 | 0.74949700  |
| C | 4.84186400  | -6.97575200 | -0.50272400 |
| H | 4.38448200  | -7.78896900 | -1.05699800 |
| C | 4.51664300  | -5.65428400 | -0.79548200 |
| H | 3.80378100  | -5.42722400 | -1.58186800 |
| C | 5.10473300  | -4.60868000 | -0.08512900 |
| H | 4.83554200  | -3.58874200 | -0.33239700 |
| C | 8.29146300  | -1.11506600 | -0.00068900 |
| C | 9.11991900  | -0.98422400 | -1.13437600 |
| H | 8.77376000  | -1.34683000 | -2.09621800 |
| C | 10.36422300 | -0.39418600 | -1.03036200 |
| H | 11.00402200 | -0.28458300 | -1.89548000 |
| C | 10.80081900 | 0.07450200  | 0.21059500  |
| C | 9.99773500  | -0.03999500 | 1.34063800  |
| H | 10.35942000 | 0.33833900  | 2.28751400  |
| C | 8.74748600  | -0.63256000 | 1.23841700  |
| H | 8.11859400  | -0.71106400 | 2.11520100  |
| N | 3.86904100  | -1.08543400 | 4.39074000  |
| N | 3.96867300  | -2.38038200 | 4.87361600  |
| N | 6.08237900  | -1.53773200 | 0.84970700  |
| N | 7.07272700  | -1.78064900 | -0.14191200 |
| H | 6.66071000  | -1.63400100 | -1.05694200 |
| N | 12.11792000 | 0.70268000  | 0.32220100  |
| O | 4.48766900  | 0.14301300  | 2.50548700  |
| O | 12.79972500 | 0.78795600  | -0.69457700 |
| C | 6.87715300  | 0.38115300  | -3.95778000 |
| C | 6.36118000  | -0.91935900 | -3.99784500 |
| H | 5.46513400  | -1.16282000 | -3.44376600 |
| C | 7.00626500  | -1.88905000 | -4.76278400 |
| H | 6.60264500  | -2.89615000 | -4.78951400 |
| C | 8.14757700  | -1.57374000 | -5.49711700 |
| H | 8.64256900  | -2.33349500 | -6.09272400 |
| C | 8.64129800  | -0.26993600 | -5.46829200 |
| H | 9.52430300  | -0.00933700 | -6.04276700 |
| C | 8.01505900  | 0.70736600  | -4.70192600 |
| H | 8.38708000  | 1.72288400  | -4.67525600 |
| C | 5.56059600  | 1.24413800  | -2.00497200 |
| C | 5.17363600  | 2.57092600  | -1.61717200 |
| C | 5.75449100  | 3.42061200  | -2.63557200 |
| C | 5.74746700  | 4.91044900  | -2.79582900 |
| H | 4.75427500  | 5.29353500  | -3.05220600 |
| H | 6.08015400  | 5.42351400  | -1.89096900 |
| H | 6.42129500  | 5.17230100  | -3.61182600 |
| C | 4.35181100  | 2.86288700  | -0.50010200 |
| C | 3.93793100  | 4.29229600  | -0.21245700 |
| H | 3.84226500  | 4.83296200  | -1.15219300 |
| H | 2.94804100  | 4.29565300  | 0.24416900  |
| C | 4.89322200  | 5.05016600  | 0.70464500  |
| C | 4.80707200  | 6.44693300  | 0.75155900  |
| H | 4.08731500  | 6.96031000  | 0.11962400  |
| C | 5.62944700  | 7.18694700  | 1.59554300  |
| H | 5.54667200  | 8.26897400  | 1.61478200  |
| C | 6.56085100  | 6.54125600  | 2.40725600  |
| H | 7.20809200  | 7.11590700  | 3.06152100  |

|    |             |             |             |
|----|-------------|-------------|-------------|
| C  | 6.65805700  | 5.15390600  | 2.36590000  |
| H  | 7.38466000  | 4.64042600  | 2.98730500  |
| C  | 5.82914800  | 4.41375100  | 1.52289800  |
| H  | 5.92433200  | 3.33359800  | 1.50537300  |
| C  | 1.70785300  | 2.07376500  | 1.16523000  |
| C  | 0.87135400  | 2.15466300  | 2.30788800  |
| H  | 1.31788800  | 2.28547400  | 3.28736800  |
| C  | -0.49348200 | 2.06184800  | 2.18252300  |
| H  | -1.13576300 | 2.12633300  | 3.05077400  |
| C  | -1.05879800 | 1.84347700  | 0.91516200  |
| C  | -0.25073700 | 1.75049500  | -0.22393900 |
| H  | -0.70798400 | 1.57317600  | -1.18803800 |
| C  | 1.11639300  | 1.89234200  | -0.10562400 |
| H  | 1.74406000  | 1.82638100  | -0.98380900 |
| N  | 6.25216700  | 1.38588000  | -3.17790000 |
| N  | 6.38791000  | 2.71753300  | -3.53859600 |
| N  | 3.94726400  | 1.87414300  | 0.29175600  |
| N  | 3.05906600  | 2.23105500  | 1.33477600  |
| H  | 3.41809900  | 1.90699700  | 2.22787500  |
| N  | -2.47245000 | 1.68069700  | 0.80733300  |
| O  | 5.36188500  | 0.12627300  | -1.43323800 |
| O  | -3.19781900 | 2.03063900  | 1.73053200  |
| Zn | -4.76650800 | 0.01303700  | -0.48972300 |
| O  | 12.46816800 | 1.10983800  | 1.42612400  |
| C  | -6.87991100 | -0.38085400 | 3.95726800  |
| C  | -6.36395400 | 0.91965100  | 3.99758300  |
| H  | -5.46736400 | 1.16298000  | 3.44431400  |
| C  | -7.00971200 | 1.88948400  | 4.76177000  |
| H  | -6.60609700 | 2.89658200  | 4.78872000  |
| C  | -8.15170200 | 1.57430800  | 5.49511500  |
| H  | -8.64721900 | 2.33417200  | 6.09014700  |
| C  | -8.64541200 | 0.27050600  | 5.46607100  |
| H  | -9.52894000 | 0.01001500  | 6.03979100  |
| C  | -8.01848400 | -0.70693400 | 4.70043700  |
| H  | -8.39049000 | -1.72245500 | 4.67360700  |
| C  | -5.56227200 | -1.24416200 | 2.00538200  |
| C  | -5.17447800 | -2.57092300 | 1.61836200  |
| C  | -5.75530500 | -3.42041400 | 2.63694100  |
| C  | -5.74755400 | -4.91016600 | 2.79796700  |
| H  | -4.75420700 | -5.29262900 | 3.05467300  |
| H  | -6.07988000 | -5.42386600 | 1.89333300  |
| H  | -6.42136300 | -5.17192800 | 3.61401100  |
| C  | -4.35215100 | -2.86299800 | 0.50167900  |
| C  | -3.93818000 | -4.29246500 | 0.21441000  |
| H  | -3.84245500 | -4.83287200 | 1.15428900  |
| H  | -2.94832200 | -4.29590800 | -0.24227600 |
| C  | -4.89350000 | -5.05058400 | -0.70245000 |
| C  | -4.80770100 | -6.44739500 | -0.74868300 |
| H  | -4.08819200 | -6.96065800 | -0.11637300 |
| C  | -5.63011500 | -7.18759700 | -1.59247100 |
| H  | -5.54762100 | -8.26965400 | -1.61117800 |
| C  | -6.56119800 | -6.54204800 | -2.40466300 |
| H  | -7.20846800 | -7.11684100 | -3.05877600 |
| C  | -6.65804800 | -5.15465000 | -2.36398900 |
| H  | -7.38439600 | -4.64127300 | -2.98577700 |
| C  | -5.82910600 | -4.41431900 | -1.52118300 |
| H  | -5.92400500 | -3.33413400 | -1.50417500 |
| C  | -1.70787500 | -2.07454100 | -1.16361500 |
| C  | -0.87142100 | -2.15599700 | -2.30627200 |
| H  | -1.31801900 | -2.28704000 | -3.28569300 |
| C  | 0.49344700  | -2.06351700 | -2.18097200 |
| H  | 1.13568900  | -2.12849200 | -3.04921600 |
| C  | 1.05883400  | -1.84482900 | -0.91370400 |
| C  | 0.25083400  | -1.75125600 | 0.22538400  |
| H  | 0.70814900  | -1.57373600 | 1.18941600  |
| C  | -1.11634200 | -1.89284600 | 0.10715700  |
| H  | -1.74396800 | -1.82653100 | 0.98534700  |
| N  | -6.25420700 | -1.38569300 | 3.17811600  |
| N  | -6.38943000 | -2.71723300 | 3.53939900  |
| N  | -3.94734800 | -1.87438700 | -0.29021400 |
| N  | -3.05912400 | -2.23161200 | -1.33313200 |
| H  | -3.41808000 | -1.90760200 | -2.22628500 |
| N  | 2.47257600  | -1.68255200 | -0.80591800 |
| O  | -5.36408000 | -0.12648100 | 1.43313500  |
| O  | 2.92155900  | -1.16836700 | 0.24964600  |
| O  | 3.19786500  | -2.03380200 | -1.72868200 |
| C  | -3.12512600 | 0.12108900  | -5.11533200 |
| C  | -3.50411200 | -1.22565500 | -5.11260100 |

|    |              |             |             |
|----|--------------|-------------|-------------|
| H  | -4.38680400  | -1.53373400 | -4.56826600 |
| C  | -2.75777300  | -2.15406100 | -5.83562900 |
| H  | -3.06342900  | -3.19557200 | -5.83697200 |
| C  | -1.64516000  | -1.75019400 | -6.57158800 |
| H  | -1.07301600  | -2.47530200 | -7.14070500 |
| C  | -1.28714400  | -0.40237000 | -6.58792300 |
| H  | -0.43203000  | -0.07416100 | -7.16993200 |
| C  | -2.01846500  | 0.53324200  | -5.86361000 |
| H  | -1.75883700  | 1.58374200  | -5.88033900 |
| C  | -4.49572900  | 0.93874700  | -3.18107600 |
| C  | -5.09238500  | 2.20920600  | -2.89855400 |
| C  | -4.69589100  | 3.04190700  | -4.01124100 |
| C  | -4.96923100  | 4.48614700  | -4.30122900 |
| H  | -6.01524100  | 4.65917700  | -4.57392300 |
| H  | -4.73971700  | 5.12903500  | -3.44939500 |
| H  | -4.35464600  | 4.79176700  | -5.14842900 |
| C  | -5.95298100  | 2.45971100  | -1.78985000 |
| C  | -6.73323400  | 3.75802600  | -1.70201100 |
| H  | -6.96730100  | 4.10622000  | -2.70662400 |
| H  | -7.68571300  | 3.55921300  | -1.21014700 |
| C  | -6.02251400  | 4.86829600  | -0.93547900 |
| C  | -6.33941300  | 6.20089900  | -1.22439100 |
| H  | -7.05342700  | 6.42326400  | -2.01255000 |
| C  | -5.75615900  | 7.24624500  | -0.51374400 |
| H  | -6.01761500  | 8.27192200  | -0.75436300 |
| C  | -4.83818700  | 6.97662100  | 0.49972100  |
| H  | -4.38046900  | 7.78991600  | 1.05360200  |
| C  | -4.51427300  | 5.65512700  | 0.79380500  |
| H  | -3.80211600  | 5.42815100  | 1.58085800  |
| C  | -5.10279000  | 4.60941000  | 0.08396700  |
| H  | -4.83467100  | 3.58945500  | 0.33231400  |
| C  | -8.29143300  | 1.11761700  | -0.00086000 |
| C  | -9.12053200  | 0.98728400  | 1.13241800  |
| H  | -8.77445500  | 1.34932200  | 2.09450200  |
| C  | -10.36531300 | 0.39838700  | 1.02771500  |
| H  | -11.00558900 | 0.28913200  | 1.89252100  |
| C  | -10.80174400 | -0.06962300 | -0.21355600 |
| C  | -9.99804500  | 0.04440200  | -1.34320800 |
| H  | -10.35961000 | -0.33340400 | -2.29034000 |
| C  | -8.74731400  | 0.63581400  | -1.24028100 |
| H  | -8.11794900  | 0.71389700  | -2.11676200 |
| N  | -3.86778200  | 1.08309400  | -4.39037800 |
| N  | -3.96652400  | 2.37788500  | -4.87385200 |
| N  | -6.08143200  | 1.53833100  | -0.84994000 |
| N  | -7.07210000  | 1.78201600  | 0.14117900  |
| H  | -6.66072200  | 1.63438400  | 1.05634300  |
| N  | -12.11935300 | -0.69664100 | -0.32592100 |
| O  | -4.48741200  | -0.14412600 | -2.50467000 |
| O  | -12.46962300 | -1.10288100 | -1.43016000 |
| O  | -12.80154600 | -0.78189600 | 0.69061400  |
| Zn | 4.76637400   | -0.01319500 | 0.49040500  |
| O  | -2.92127800  | 1.16721300  | -0.24866600 |

### Complex trinuclear $[Zn(HL^4)_2]_3$

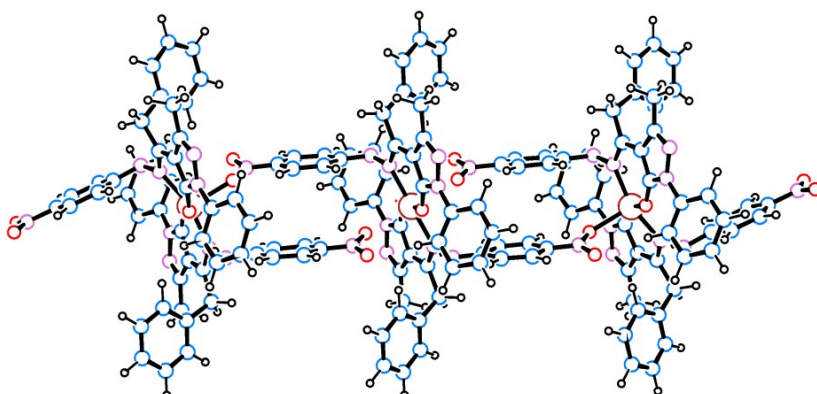

|   |            |            |             |
|---|------------|------------|-------------|
| C | 1.70027800 | 0.08755800 | -4.60626000 |
| C | 1.15669400 | 1.37454600 | -4.51979900 |
| H | 0.27198000 | 1.54646200 | -3.92085300 |
| C | 1.74902200 | 2.41853800 | -5.22746100 |
| H | 1.31957900 | 3.41333900 | -5.16279000 |
| C | 2.86744500 | 2.19036800 | -6.02787700 |

|   |             |             |             |
|---|-------------|-------------|-------------|
| H | 3.31900000  | 3.00633400  | -6.58242300 |
| C | 3.38870400  | 0.90054800  | -6.12538800 |
| H | 4.25035500  | 0.70828000  | -6.75651500 |
| C | 2.81266800  | -0.15025500 | -5.41845400 |
| H | 3.20028700  | -1.15781100 | -5.49658000 |
| C | 0.51618200  | -0.96378600 | -2.66617400 |
| C | 0.06404700  | -2.30363100 | -2.42521400 |
| C | 0.51686700  | -3.04099400 | -3.58554000 |
| C | 0.39888800  | -4.49240500 | -3.94053900 |
| H | -0.63139100 | -4.77752700 | -4.17728700 |
| H | 0.74880000  | -5.14417000 | -3.13761200 |
| H | 1.00216900  | -4.67842500 | -4.82952200 |
| C | -0.71229000 | -2.69924100 | -1.29974200 |
| C | -1.24587900 | -4.11944900 | -1.20632900 |
| H | -1.44666800 | -4.48786300 | -2.21032900 |
| H | -2.20779900 | -4.10675400 | -0.69304000 |
| C | -0.33478500 | -5.10608000 | -0.48557100 |
| C | -0.38870400 | -6.46025000 | -0.83567900 |
| H | -1.04331400 | -6.78021600 | -1.64166800 |
| C | 0.38156400  | -7.40518500 | -0.16283800 |
| H | 0.32368300  | -8.45011400 | -0.45091200 |
| C | 1.22584100  | -7.00940200 | 0.87272100  |
| H | 1.82926700  | -7.74328600 | 1.39713200  |
| C | 1.28846200  | -5.66455300 | 1.22759600  |
| H | 1.93974000  | -5.33987600 | 2.03278100  |
| C | 0.51339300  | -4.72093500 | 0.55541900  |
| H | 0.57566500  | -3.68170700 | 0.85286100  |
| C | -3.17388500 | -2.07614300 | 0.65666000  |
| C | -3.91229800 | -2.22770100 | 1.85915500  |
| H | -3.38536700 | -2.41184100 | 2.78876900  |
| C | -5.28200100 | -2.13367800 | 1.85515900  |
| H | -5.84777200 | -2.24881300 | 2.77005300  |
| C | -5.95371200 | -1.84808500 | 0.65408100  |
| C | -5.24316500 | -1.68346700 | -0.54121800 |
| H | -5.77883100 | -1.45310900 | -1.45198100 |
| C | -3.87094000 | -1.81963300 | -0.54615000 |
| H | -3.32098200 | -1.69413500 | -1.46889300 |
| N | 1.11541300  | -0.98923500 | -3.89803900 |
| N | 1.13982900  | -2.26475500 | -4.43717700 |
| N | -0.98658500 | -1.81057200 | -0.35581300 |
| N | -1.81597100 | -2.24456800 | 0.70490100  |
| H | -1.39352700 | -2.00805400 | 1.59680000  |
| N | -7.37001800 | -1.69204300 | 0.67359800  |
| O | 0.44532800  | 0.08436000  | -1.95084800 |
| O | -8.01249400 | -2.06583300 | 1.64843400  |
| C | -1.70046500 | -0.08712000 | 4.60744800  |
| C | -1.15711100 | -1.37419100 | 4.52081200  |
| H | -0.27239300 | -1.54617000 | 3.92188900  |
| C | -1.74965100 | -2.41818500 | 5.22829700  |
| H | -1.32038700 | -3.41305400 | 5.16348500  |
| C | -2.86805600 | -2.18993100 | 6.02871400  |
| H | -3.31977800 | -3.00589900 | 6.58312000  |
| C | -3.38908000 | -0.90003000 | 6.12640700  |
| H | -4.25071400 | -0.70770000 | 6.75753800  |
| C | -2.81283500 | 0.15077500  | 5.41964800  |
| H | -3.20027500 | 1.15838900  | 5.49790900  |
| C | -0.51619900 | 0.96429300  | 2.66750900  |
| C | -0.06380800 | 2.30407700  | 2.42674200  |
| C | -0.51643800 | 3.04135200  | 3.58720100  |
| C | -0.39815200 | 4.49268800  | 3.94240900  |
| H | 0.63217400  | 4.77752800  | 4.17929500  |
| H | -0.74783000 | 5.14465300  | 3.13954300  |
| H | -1.00146900 | 4.67873100  | 4.83136300  |
| C | 0.71250300  | 2.69974700  | 1.30127200  |
| C | 1.24648500  | 4.11982200  | 1.20818400  |
| H | 1.44739000  | 4.48791700  | 2.21228000  |
| H | 2.20841600  | 4.10696400  | 0.69491500  |
| C | 0.33572200  | 5.10694200  | 0.48768800  |
| C | 0.39069700  | 6.46111000  | 0.83766000  |
| H | 1.04587300  | 6.78069800  | 1.64334000  |
| C | -0.37923400 | 7.40650000  | 0.16508300  |
| H | -0.32053700 | 8.45141400  | 0.45304600  |
| C | -1.22422600 | 7.01119500  | -0.87008000 |
| H | -1.82738600 | 7.74543900  | -1.39429000 |
| C | -1.28789900 | 5.66636100  | -1.22481200 |
| H | -1.93973300 | 5.34206300  | -2.02970100 |
| C | -0.51317100 | 4.72227600  | -0.55289100 |
| H | -0.57627900 | 3.68306700  | -0.85022000 |

|    |              |             |             |
|----|--------------|-------------|-------------|
| C  | 3.17363400   | 2.07668100  | -0.65577000 |
| C  | 3.91180900   | 2.22831100  | -1.85839900 |
| H  | 3.38471600   | 2.41269100  | -2.78787300 |
| C  | 5.28149500   | 2.13401300  | -1.85472700 |
| H  | 5.84707200   | 2.24917200  | -2.76973700 |
| C  | 5.95342400   | 1.84808400  | -0.65385300 |
| C  | 5.24311000   | 1.68340500  | 0.54158200  |
| H  | 5.77893700   | 1.45279400  | 1.45218700  |
| C  | 3.87091700   | 1.81983100  | 0.54684200  |
| H  | 3.32114400   | 1.69426800  | 1.46968700  |
| N  | -1.11539200  | 0.98966600  | 3.89939000  |
| N  | -1.13954300  | 2.26510900  | 4.43872800  |
| N  | 0.98649200   | 1.81124100  | 0.35710600  |
| N  | 1.81575100   | 2.24537400  | -0.70365200 |
| H  | 1.39305700   | 2.00931100  | -1.59554500 |
| N  | 7.36968300   | 1.69172600  | -0.67373000 |
| O  | -0.44556900  | -0.08375600 | 1.95200700  |
| O  | 8.01202200   | 2.06546000  | -1.64867500 |
| Zn | 9.77559300   | 0.02927700  | 0.39672200  |
| Zn | -9.77570100  | -0.02954900 | -0.39745300 |
| C  | -8.49403400  | -0.10180700 | -5.13971400 |
| C  | -8.88902100  | 1.23985100  | -5.09947400 |
| H  | -9.72494100  | 1.53457100  | -4.47946600 |
| C  | -8.21917500  | 2.18045500  | -5.87907900 |
| H  | -8.53698100  | 3.21786500  | -5.84897500 |
| C  | -7.16757200  | 1.79428400  | -6.70820400 |
| H  | -6.65470200  | 2.52904600  | -7.31988100 |
| C  | -6.79428600  | 0.45152400  | -6.76019000 |
| H  | -5.98655300  | 0.13691900  | -7.41313200 |
| C  | -7.44927100  | -0.49641200 | -5.98097600 |
| H  | -7.17797100  | -1.54316900 | -6.02420900 |
| C  | -9.70182000  | -0.94009000 | -3.10741100 |
| C  | -10.25774000 | -2.21934100 | -2.78387200 |
| C  | -9.92894200  | -3.04686300 | -3.92173400 |
| C  | -10.19899100 | -4.49596200 | -4.18984700 |
| H  | -11.25801600 | -4.68539300 | -4.39230600 |
| H  | -9.90421600  | -5.13247200 | -3.35344600 |
| H  | -9.63731400  | -4.79531000 | -5.07519500 |
| C  | -11.03829800 | -2.47927200 | -1.61948900 |
| C  | -11.80050700 | -3.78386800 | -1.48104500 |
| H  | -12.09561400 | -4.13511800 | -2.46839400 |
| H  | -12.72081500 | -3.59195400 | -0.92858400 |
| C  | -11.03219400 | -4.88760400 | -0.76177400 |
| C  | -11.36185300 | -6.22277700 | -1.02355500 |
| H  | -12.12956300 | -6.45109600 | -1.75776600 |
| C  | -10.72289300 | -7.26287100 | -0.35436400 |
| H  | -10.99536200 | -8.29067800 | -0.57280000 |
| C  | -9.73509500  | -6.98527800 | 0.58892700  |
| H  | -9.23318000  | -7.79447000 | 1.10958400  |
| C  | -9.39827100  | -5.66121900 | 0.85547700  |
| H  | -8.63108700  | -5.42767100 | 1.58687400  |
| C  | -10.04280900 | -4.62068800 | 0.18777800  |
| H  | -9.76255300  | -3.59885000 | 0.41359000  |
| C  | -13.25357100 | -1.13594900 | 0.32269900  |
| C  | -14.00685700 | -1.00552300 | 1.50782900  |
| H  | -13.60156900 | -1.37395900 | 2.44405600  |
| C  | -15.25218400 | -0.40884600 | 1.48592400  |
| H  | -15.83490300 | -0.30006800 | 2.39059500  |
| C  | -15.76465500 | 0.06787300  | 0.27740600  |
| C  | -15.03592500 | -0.04551900 | -0.90223800 |
| H  | -15.45520500 | 0.33951300  | -1.82226200 |
| C  | -13.78505800 | -0.64482900 | -0.88255900 |
| H  | -13.21309400 | -0.72181700 | -1.79759800 |
| N  | -9.16052700  | -1.07593600 | -4.35941900 |
| N  | -9.27368100  | -2.37274600 | -4.83458900 |
| N  | -11.10829900 | -1.56017500 | -0.67185600 |
| N  | -12.03185100 | -1.80806900 | 0.38124800  |
| H  | -11.56022900 | -1.66627900 | 1.26797300  |
| N  | -17.08289600 | 0.70250700  | 0.25248000  |
| O  | -9.66119200  | 0.14241300  | -2.43226800 |
| O  | -17.50074700 | 1.11662700  | -0.82515900 |
| O  | -17.69863500 | 0.78619900  | 1.31082600  |
| C  | -11.53269800 | 0.29757900  | 4.20915000  |
| C  | -11.02271600 | -1.00579800 | 4.17980300  |
| H  | -10.17888900 | -1.24158600 | 3.54597400  |
| C  | -11.60476800 | -1.98747000 | 4.97923700  |
| H  | -11.20640900 | -2.99664500 | 4.95135300  |
| C  | -12.67585500 | -1.68161900 | 5.81612600  |



|   |              |             |             |
|---|--------------|-------------|-------------|
| H | -13.12188900 | -2.45076200 | 6.43785100  |
| C | -13.16214100 | -0.37529700 | 5.85552200  |
| H | -13.98986400 | -0.12216200 | 6.51012700  |
| C | -12.59939600 | 0.61401900  | 5.05606000  |
| H | -12.96596300 | 1.63156500  | 5.08131000  |
| C | -10.38112300 | 1.19304500  | 2.16873700  |
| C | -10.01812200 | 2.52432400  | 1.77589700  |
| C | -10.50119700 | 3.35594900  | 2.85804700  |
| C | -10.46003500 | 4.84108700  | 3.05308800  |
| H | -9.44147100  | 5.20662900  | 3.22012400  |
| H | -10.87265700 | 5.38134600  | 2.19844700  |
| H | -11.04758200 | 5.08840900  | 3.93750200  |
| C | -9.29243200  | 2.83502800  | 0.59725100  |
| C | -8.90215200  | 4.26987500  | 0.30048700  |
| H | -8.70578300  | 4.78879000  | 1.23690400  |
| H | -7.96622700  | 4.27979500  | -0.25797200 |
| C | -9.94393300  | 5.04996900  | -0.49496400 |
| C | -9.91442500  | 6.44890700  | -0.44940600 |
| H | -9.17649300  | 6.94872200  | 0.17227700  |
| C | -10.81680800 | 7.20858000  | -1.18799000 |
| H | -10.77737700 | 8.29202300  | -1.13597800 |
| C | -11.77238300 | 6.58010400  | -1.98464100 |
| H | -12.48207800 | 7.16950800  | -2.55577800 |
| C | -11.81267200 | 5.18993000  | -2.03555400 |
| H | -12.55659200 | 4.68908200  | -2.64673200 |
| C | -10.90432500 | 4.43089400  | -1.29841000 |
| H | -10.95524500 | 3.34882300  | -1.34984400 |
| C | -6.78965600  | 2.07007500  | -1.28585500 |
| C | -6.05035700  | 2.13471400  | -2.49281300 |
| H | -6.57529100  | 2.25485600  | -3.43417600 |
| C | -4.67820300  | 2.04166500  | -2.47910100 |
| H | -4.10967800  | 2.09538300  | -3.39806800 |
| C | -4.01109600  | 1.84266000  | -1.26115400 |
| C | -4.72155500  | 1.76335700  | -0.06045600 |
| H | -4.18669200  | 1.59970000  | 0.86545000  |
| C | -6.09621700  | 1.90158800  | -0.06785300 |
| H | -6.64793300  | 1.84624600  | 0.86080200  |
| N | -10.97196600 | 1.31485900  | 3.39809500  |
| N | -11.06267700 | 2.63889900  | 3.79747700  |
| N | -8.95588300  | 1.86053600  | -0.24102800 |
| N | -8.15415100  | 2.23340600  | -1.34916400 |
| H | -8.57599500  | 1.89141300  | -2.20743600 |
| N | -2.58323400  | 1.69455900  | -1.26371000 |
| O | -10.23981900 | 0.08450900  | 1.56281500  |
| O | -2.04419800  | 1.19704000  | -0.25578900 |
| O | -1.94932700  | 2.05977300  | -2.25099000 |
| O | -7.91279500  | -1.15959800 | -0.32841300 |
| C | 11.53225400  | -0.29825700 | -4.20994300 |
| C | 11.02228600  | 1.00512800  | -4.18066200 |
| H | 10.17847700  | 1.24096100  | -3.54682600 |
| C | 11.60432100  | 1.98674700  | -4.98017100 |
| H | 11.20597300  | 2.99592800  | -4.95233000 |
| C | 12.67537800  | 1.68083700  | -5.81707900 |
| H | 13.12140000  | 2.44993900  | -6.43886200 |
| C | 13.16164500  | 0.37450700  | -5.85641400 |
| H | 13.98934000  | 0.12132000  | -6.51103400 |
| C | 12.59891900  | -0.61475700 | -5.05687400 |
| H | 12.96547600  | -1.63230700 | -5.08207500 |
| C | 10.38076100  | -1.19355900 | -2.16941500 |
| C | 10.01781600  | -2.52480000 | -1.77643500 |
| C | 10.50084200  | -3.35652100 | -2.85853100 |
| C | 10.45974000  | -4.84168400 | -3.05340500 |
| H | 9.44120400   | -5.20728000 | -3.22049900 |
| H | 10.87228800  | -5.38183100 | -2.19865600 |
| H | 11.04738100  | -5.08909000 | -3.93773100 |
| C | 9.29220700   | -2.83541100 | -0.59770900 |
| C | 8.90180900   | -4.27021500 | -0.30090300 |
| H | 8.70551800   | -4.78916100 | -1.23731900 |
| H | 7.96581000   | -4.28004500 | 0.25743700  |
| C | 9.94342500   | -5.05036500 | 0.49471100  |
| C | 9.91345000   | -6.44931100 | 0.44960100  |
| H | 9.17527100   | -6.94907800 | -0.17183000 |
| C | 10.81567500  | -7.20904700 | 1.18830400  |
| H | 10.77587900  | -8.29249400 | 1.13664600  |
| C | 11.77156700  | -6.58063400 | 1.98463200  |
| H | 12.48113900  | -7.17009300 | 2.55586500  |
| C | 11.81232600  | -5.19046100 | 2.03509200  |
| H | 12.55649400  | -4.68966200 | 2.64600900  |

|    |             |             |             |
|----|-------------|-------------|-------------|
| C  | 10.90412900 | -4.43135600 | 1.29782600  |
| H  | 10.95541600 | -3.34928600 | 1.34891900  |
| C  | 6.78973600  | -2.07016000 | 1.28579600  |
| C  | 6.05067800  | -2.13465100 | 2.49290600  |
| H  | 6.57578400  | -2.25484900 | 3.43416500  |
| C  | 4.67853600  | -2.04136200 | 2.47947700  |
| H  | 4.11019100  | -2.09495200 | 3.39856400  |
| C  | 4.01121100  | -1.84226500 | 1.26166700  |
| C  | 4.72143200  | -1.76312200 | 0.06082000  |
| H  | 4.18640900  | -1.59939500 | -0.86498100 |
| C  | 6.09607300  | -1.90159500 | 0.06793400  |
| H  | 6.64760500  | -1.84636900 | -0.86083700 |
| N  | 10.97153900 | -1.31547300 | -3.39880200 |
| N  | 11.06228000 | -2.63954900 | -3.79805000 |
| N  | 8.95580700  | -1.86088200 | 0.24056900  |
| N  | 8.15422200  | -2.23370400 | 1.34883200  |
| H  | 8.57626500  | -1.89178400 | 2.20703500  |
| N  | 2.58337900  | -1.69384600 | 1.26452600  |
| O  | 10.23945700 | -0.08496700 | -1.56359100 |
| O  | 2.04425000  | -1.19617400 | 0.25674300  |
| O  | 1.94960600  | -2.05894300 | 2.25194100  |
| C  | 8.49479600  | 0.10167700  | 5.13928600  |
| C  | 8.88986100  | -1.23995900 | 5.09903900  |
| H  | 9.72566500  | -1.53466100 | 4.47886600  |
| C  | 8.22024300  | -2.18056200 | 5.87884000  |
| H  | 8.53810700  | -3.21795400 | 5.84871900  |
| C  | 7.16879200  | -1.79441500 | 6.70816800  |
| H  | 6.65609900  | -2.52917600 | 7.31999300  |
| C  | 6.79543000  | -0.45167600 | 6.76015800  |
| H  | 5.98781800  | -0.13708500 | 7.41325500  |
| C  | 7.45018800  | 0.49626100  | 5.98075100  |
| H  | 7.17882900  | 1.54300200  | 6.02398500  |
| C  | 9.70212300  | 0.93990200  | 3.10668500  |
| C  | 10.25791300 | 2.21917400  | 2.78296800  |
| C  | 9.92925800  | 3.04675100  | 3.92083200  |
| C  | 10.19924800 | 4.49589100  | 4.18878100  |
| H  | 11.25829000 | 4.68541900  | 4.39105700  |
| H  | 9.90429500  | 5.13230500  | 3.35236900  |
| H  | 9.63768800  | 4.79527800  | 5.07419100  |
| C  | 11.03829800 | 2.47906300  | 1.61846300  |
| C  | 11.80048100 | 3.78365300  | 1.47983600  |
| H  | 12.09566200 | 4.13500500  | 2.46712600  |
| H  | 12.72075100 | 3.59170300  | 0.92732400  |
| C  | 11.03209500 | 4.88731300  | 0.76051700  |
| C  | 11.36173000 | 6.22251400  | 1.02218000  |
| H  | 12.12946600 | 6.45090900  | 1.75634000  |
| C  | 10.72271000 | 7.26254100  | 0.35294100  |
| H  | 10.99516500 | 8.29037000  | 0.57129200  |
| C  | 9.73487600  | 6.98485100  | -0.59028200 |
| H  | 9.23291400  | 7.79398600  | -1.11098100 |
| C  | 9.39807700  | 5.66076200  | -0.85671800 |
| H  | 8.63086500  | 5.42713800  | -1.58806000 |
| C  | 10.04267600 | 4.62029700  | -0.18897300 |
| H  | 9.76243800  | 3.59843600  | -0.41469700 |
| C  | 13.25335100 | 1.13562900  | -0.32386800 |
| C  | 14.00654900 | 1.00518600  | -1.50905400 |
| H  | 13.60118400 | 1.37360300  | -2.44525500 |
| C  | 15.25188100 | 0.40852000  | -1.48723200 |
| H  | 15.83453600 | 0.29972900  | -2.39194200 |
| C  | 15.76444800 | -0.06816800 | -0.27874000 |
| C  | 15.03580800 | 0.04524300  | 0.90095600  |
| H  | 15.45515800 | -0.33976900 | 1.82095600  |
| C  | 13.78493300 | 0.64454400  | 0.88136000  |
| H  | 13.21303600 | 0.72153500  | 1.79644100  |
| N  | 9.16106000  | 1.07580000  | 4.35879300  |
| N  | 9.27420200  | 2.37265500  | 4.83384700  |
| N  | 11.10816800 | 1.55991700  | 0.67086400  |
| N  | 12.03161300 | 1.80773300  | -0.38235700 |
| H  | 11.55990300 | 1.66583600  | -1.26901900 |
| N  | 17.08269700 | -0.70279100 | -0.25390100 |
| O  | 9.66144200  | -0.14263800 | 2.43162300  |
| O  | 17.50062500 | -1.11690300 | 0.82371200  |
| O  | 17.69834500 | -0.78652300 | -1.31229700 |
| Zn | -0.00011900 | 0.00036500  | 0.00058100  |
| O  | 7.91259000  | 1.15908600  | 0.32811800  |

## Complex 5

|    |             |             |             |
|----|-------------|-------------|-------------|
| Zn | 0.00028200  | 0.00016500  | -0.00005200 |
| C  | -3.20081300 | 3.10970600  | -2.19202400 |
| C  | -3.01608300 | 2.15129600  | -3.19503300 |
| H  | -2.07624700 | 1.62227000  | -3.26560100 |
| C  | -4.04039200 | 1.90219200  | -4.10608600 |
| H  | -3.88751800 | 1.16144000  | -4.88451900 |
| C  | -5.24121200 | 2.60510800  | -4.03678400 |
| H  | -6.03271500 | 2.40890000  | -4.75236700 |
| C  | -5.41000500 | 3.57316400  | -3.04760500 |
| H  | -6.33587000 | 4.13642400  | -2.98970900 |
| C  | -4.40012700 | 3.82681500  | -2.12572200 |
| H  | -4.51687500 | 4.58365700  | -1.36132200 |
| C  | -1.23443000 | 2.53532400  | -0.73218500 |
| C  | -0.49694500 | 3.30946800  | 0.23099500  |
| C  | -1.11245100 | 4.62018300  | 0.16808100  |
| C  | -0.76767400 | 5.93111800  | 0.81392600  |
| H  | 0.22838700  | 6.27844300  | 0.52290400  |
| H  | -0.80102100 | 5.90050800  | 1.90381400  |
| H  | -1.48957100 | 6.67335200  | 0.47222500  |
| C  | 0.66769200  | 2.83915400  | 0.92748700  |
| C  | 3.46625600  | 1.32022200  | 0.24721400  |
| C  | 4.59696900  | 0.51518500  | 0.49317800  |
| H  | 4.60793200  | -0.14176100 | 1.35684800  |
| C  | 5.68885300  | 0.55692300  | -0.35495200 |
| H  | 6.54986800  | -0.06773300 | -0.14613600 |
| C  | 5.69188000  | 1.39742800  | -1.47515800 |
| C  | 4.57727300  | 2.19279000  | -1.72769000 |
| H  | 4.57066900  | 2.85566700  | -2.58531200 |
| C  | 3.47101200  | 2.15966000  | -0.88169100 |
| H  | 2.62409300  | 2.80374200  | -1.08195200 |
| N  | -2.18242000 | 3.38677000  | -1.24742400 |
| N  | -2.09981600 | 4.64915200  | -0.69328600 |
| N  | 1.12666000  | 1.63578400  | 0.63292900  |
| N  | 2.40966900  | 1.29425100  | 1.15705000  |
| H  | 2.33975600  | 0.39723400  | 1.62707200  |
| O  | -1.13558500 | 1.31598300  | -1.08266400 |
| C  | 3.20082000  | -3.10959900 | 2.19211800  |
| C  | 3.01618800  | -2.15121000 | 3.19516300  |
| H  | 2.07636400  | -1.62217300 | 3.26582600  |
| C  | 4.04058700  | -1.90212500 | 4.10611700  |
| H  | 3.88779700  | -1.16139000 | 4.88458200  |
| C  | 5.24139900  | -2.60504800 | 4.03668100  |
| H  | 6.03297000  | -2.40885500 | 4.75219100  |
| C  | 5.41009100  | -3.57308900 | 3.04747500  |
| H  | 6.33594600  | -4.13635400 | 2.98947700  |
| C  | 4.40011500  | -3.82671800 | 2.12568600  |
| H  | 4.51678400  | -4.58355200 | 1.36126600  |
| C  | 1.23453400  | -2.53506900 | 0.73223400  |
| C  | 0.49690500  | -3.30918300 | -0.23085400 |
| C  | 1.11215600  | -4.62002100 | -0.16775800 |
| C  | 0.76719200  | -5.93096100 | -0.81349800 |
| H  | -0.22894100 | -6.27810200 | -0.52250700 |
| H  | 0.80061800  | -5.90046000 | -1.90338600 |
| H  | 1.48894800  | -6.67327500 | -0.47167600 |
| C  | -0.66769000 | -2.83879100 | -0.92733100 |
| C  | -3.46610100 | -1.31996700 | -0.24725100 |
| C  | -4.59690900 | -0.51503700 | -0.49319500 |
| H  | -4.60787300 | 0.14203800  | -1.35676500 |
| C  | -5.68887000 | -0.55706500 | 0.35480900  |
| H  | -6.54994800 | 0.06751100  | 0.14600300  |
| C  | -5.69191400 | -1.39777000 | 1.47487100  |
| C  | -4.57723600 | -2.19303000 | 1.72737300  |
| H  | -4.57063700 | -2.85605800 | 2.58487500  |
| C  | -3.47088100 | -2.15960200 | 0.88150800  |
| H  | -2.62393500 | -2.80366200 | 1.08172800  |
| N  | 2.18231500  | -3.38664500 | 1.24762900  |
| N  | 2.09948900  | -4.64907400 | 0.69363800  |
| N  | -1.12647300 | -1.63530100 | -0.63294300 |
| N  | -2.40943500 | -1.29366000 | -1.15695800 |
| H  | -2.33953400 | -0.39652700 | -1.62676500 |
| O  | 1.13597700  | -1.31565000 | 1.08252300  |
| O  | 1.44275200  | -0.31917600 | -1.70107200 |
| H  | 2.03750200  | 0.43006500  | -1.84306000 |
| O  | -1.44224200 | 0.31926900  | 1.70120200  |
| H  | -2.03672000 | -0.43025900 | 1.84282500  |
| H  | 1.98619600  | -1.11406900 | -1.66633400 |
| H  | -1.98602400 | 1.11393500  | 1.66655400  |

|   |             |             |             |
|---|-------------|-------------|-------------|
| C | 6.85418700  | 1.39001600  | -2.41864000 |
| F | 6.96628300  | 2.55024500  | -3.10358700 |
| F | 6.75261800  | 0.40521800  | -3.34936400 |
| F | 8.02874600  | 1.18558600  | -1.77969100 |
| C | -6.85435800 | -1.39067400 | 2.41817900  |
| F | -8.02889100 | -1.18669600 | 1.77902900  |
| F | -6.75327800 | -0.40575300 | 3.34882700  |
| F | -6.96616500 | -2.55087700 | 3.10320400  |
| C | -1.35877700 | -3.71084400 | -1.95795400 |
| H | -1.15970500 | -4.75465000 | -1.73001900 |
| H | -2.43608700 | -3.56775600 | -1.87236300 |
| C | -0.97198300 | -3.46583700 | -3.46402700 |
| C | -1.65621100 | -4.58726400 | -4.26919500 |
| H | -1.29917800 | -5.57680100 | -3.96768500 |
| H | -2.74184900 | -4.56925900 | -4.13338500 |
| H | -1.45498100 | -4.47522300 | -5.33843800 |
| C | 0.54674400  | -3.52735500 | -3.70078000 |
| H | 0.98276600  | -4.47805100 | -3.38862600 |
| H | 0.76347500  | -3.40515000 | -4.76606900 |
| H | 1.06698400  | -2.72608000 | -3.17188300 |
| C | -1.48066600 | -2.10839400 | -3.97838900 |
| H | -0.97692800 | -1.27492200 | -3.48452600 |
| H | -1.27737300 | -2.02145200 | -5.05044900 |
| H | -2.55610600 | -1.99727100 | -3.82830400 |
| C | 1.35853800  | 3.71114500  | 1.95832500  |
| H | 1.15920200  | 4.75495100  | 1.73061300  |
| H | 2.43588600  | 3.56833500  | 1.87269100  |
| C | 0.97177800  | 3.46577000  | 3.46432500  |
| C | -0.54698600 | 3.52702700  | 3.70099900  |
| H | -0.98313700 | 4.47767800  | 3.38892400  |
| H | -1.06709200 | 2.72574100  | 3.17199900  |
| H | -0.76376900 | 3.40467300  | 4.76626100  |
| C | 1.65578500  | 4.58716000  | 4.26973300  |
| H | 1.29867400  | 5.57670200  | 3.96835200  |
| H | 1.45446800  | 4.47492600  | 5.33893700  |
| H | 2.74143000  | 4.56930000  | 4.13401600  |
| C | 1.48061600  | 2.10831700  | 3.97850900  |
| H | 2.55607100  | 1.99734900  | 3.82843200  |
| H | 1.27732000  | 2.02122300  | 5.05055400  |
| H | 0.97697900  | 1.27485200  | 3.48453300  |

### Complex $[Zn(HL^5)_2]$ , $5'_{Td}$

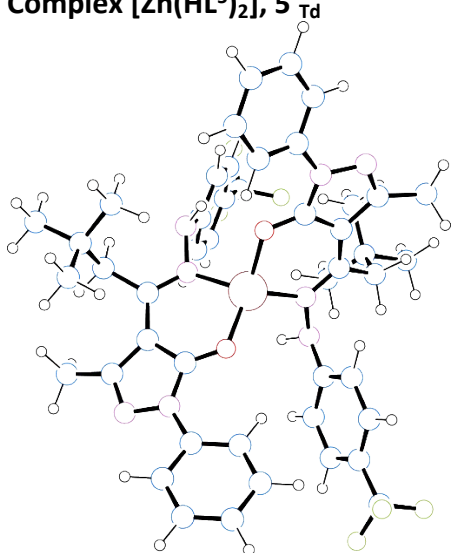

|    |             |             |             |
|----|-------------|-------------|-------------|
| Zn | -0.11103700 | 0.47501200  | 0.44012200  |
| C  | -4.58517200 | 2.33779400  | -0.37467700 |
| C  | -4.80484600 | 1.11657600  | 0.27025100  |
| H  | -3.99893000 | 0.40692000  | 0.37791900  |
| C  | -6.07220100 | 0.82573100  | 0.77021300  |
| H  | -6.24071700 | -0.12777100 | 1.25781600  |
| C  | -7.12004800 | 1.73215600  | 0.63431000  |
| H  | -8.10390200 | 1.49306600  | 1.02432500  |
| C  | -6.89367800 | 2.94463900  | -0.01394100 |
| H  | -7.70097700 | 3.66077000  | -0.13038700 |
| C  | -5.63498600 | 3.25264500  | -0.51666900 |

|   |             |             |             |
|---|-------------|-------------|-------------|
| H | -5.45214300 | 4.18707700  | -1.02883500 |
| C | -2.06897000 | 2.20825600  | -0.58778300 |
| C | -1.13656200 | 3.00947900  | -1.33195800 |
| C | -1.97589400 | 3.89245200  | -2.10845300 |
| C | -1.64865200 | 4.86491200  | -3.20406400 |
| H | -1.02641100 | 4.40878200  | -3.97970600 |
| H | -1.13033600 | 5.75714400  | -2.84707600 |
| H | -2.58342500 | 5.18401600  | -3.66562100 |
| C | 0.28487100  | 2.93913200  | -1.21053200 |
| C | 2.92694500  | 0.92753500  | -1.41167400 |
| C | 4.18360000  | 0.44275400  | -1.00459300 |
| H | 4.57481200  | 0.71831100  | -0.02993000 |
| C | 4.92446800  | -0.37828800 | -1.83640500 |
| H | 5.89099300  | -0.74230500 | -1.50782500 |
| C | 4.43422700  | -0.73979700 | -3.09529000 |
| C | 3.19289200  | -0.25779900 | -3.50626200 |
| H | 2.80911500  | -0.52365400 | -4.48447200 |
| C | 2.44237500  | 0.56947200  | -2.67880400 |
| H | 1.48451300  | 0.94558100  | -3.01511400 |
| N | -3.31228800 | 2.68346500  | -0.90999100 |
| N | -3.24365000 | 3.68610900  | -1.85956200 |
| N | 0.82272200  | 1.83989200  | -0.70092500 |
| N | 2.24233700  | 1.81482600  | -0.57948400 |
| H | 2.48772000  | 1.70836700  | 0.39905900  |
| O | -1.87823800 | 1.25973000  | 0.25056300  |
| C | 2.85214800  | 0.40356100  | 4.37704300  |
| C | 2.26065200  | 1.67167200  | 4.37319300  |
| H | 1.38865400  | 1.85828700  | 3.76497500  |
| C | 2.80270500  | 2.68308100  | 5.16251100  |
| H | 2.33608800  | 3.66293200  | 5.15716200  |
| C | 3.91958500  | 2.44622000  | 5.95940000  |
| H | 4.33316700  | 3.23945400  | 6.57326400  |
| C | 4.49593700  | 1.17723500  | 5.96594800  |
| H | 5.36301200  | 0.97566400  | 6.58669900  |
| C | 3.97137800  | 0.15754100  | 5.17997800  |
| H | 4.40501100  | -0.83315500 | 5.18741200  |
| C | 1.57763600  | -0.60954100 | 2.45384100  |
| C | 1.39786000  | -1.96987200 | 2.02923000  |
| C | 2.08348300  | -2.74064300 | 3.04855200  |
| C | 2.17826300  | -4.21699800 | 3.30357900  |
| H | 1.19025500  | -4.67748600 | 3.39621200  |
| H | 2.72442500  | -4.75577200 | 2.52759300  |
| H | 2.70365400  | -4.36108700 | 4.24788600  |
| C | 0.67896000  | -2.38258300 | 0.86573600  |
| C | -2.24255600 | -2.23332100 | -0.56183100 |
| C | -3.14456100 | -2.30846500 | -1.63631900 |
| H | -2.79583500 | -2.11844400 | -2.64725500 |
| C | -4.47536600 | -2.62486500 | -1.41801500 |
| H | -5.16046200 | -2.66979400 | -2.25594200 |
| C | -4.94043800 | -2.86797700 | -0.12355400 |
| C | -4.05081600 | -2.78212800 | 0.94694300  |
| H | -4.40397000 | -2.95443000 | 1.95742000  |
| C | -2.71490200 | -2.46703000 | 0.73799000  |
| H | -2.04219400 | -2.39101900 | 1.58192500  |
| N | 2.33127900  | -0.66127400 | 3.59326700  |
| N | 2.62212300  | -1.96341200 | 3.95333900  |
| N | -0.07463900 | -1.49838200 | 0.21536900  |
| N | -0.88648200 | -2.01981300 | -0.82775900 |
| H | -0.70402400 | -1.54701400 | -1.70252800 |
| O | 1.18704700  | 0.49005000  | 1.92882200  |
| C | 5.20252200  | -1.69477300 | -3.95339100 |
| F | 4.93240200  | -1.53964500 | -5.26782600 |
| F | 4.91462700  | -2.99541300 | -3.65868800 |
| F | 6.53835500  | -1.56447400 | -3.79720200 |
| C | -6.36344800 | -3.26336700 | 0.12224900  |
| F | -7.18133200 | -2.90862800 | -0.89066500 |
| F | -6.85839700 | -2.69717300 | 1.25367900  |
| F | -6.50467500 | -4.60268100 | 0.28438600  |
| C | 0.76443200  | -3.81750000 | 0.38811000  |
| H | 0.95315800  | -4.45736700 | 1.24541500  |
| H | -0.19951600 | -4.11633900 | -0.02198500 |
| C | 1.86066400  | -4.13776200 | -0.69495200 |
| C | 1.85365200  | -5.66818700 | -0.87307100 |
| H | 2.11429700  | -6.18371500 | 0.05633800  |
| H | 0.87140000  | -6.03032700 | -1.19140800 |
| H | 2.58006300  | -5.96973300 | -1.63280200 |
| C | 3.26528700  | -3.68654000 | -0.26035800 |
| H | 3.58956300  | -4.17392800 | 0.66167700  |

|   |             |             |             |
|---|-------------|-------------|-------------|
| H | 3.99137400  | -3.93867700 | -1.03762300 |
| H | 3.31906800  | -2.60701400 | -0.10558000 |
| C | 1.53626800  | -3.48620100 | -2.04943800 |
| H | 1.57006900  | -2.39582600 | -1.99247900 |
| H | 2.27965900  | -3.78728500 | -2.79222400 |
| H | 0.55059000  | -3.78375800 | -2.41363900 |
| C | 1.15123300  | 4.10499400  | -1.63522000 |
| H | 0.69518000  | 4.58401500  | -2.49931600 |
| H | 2.12237000  | 3.72512800  | -1.95167000 |
| C | 1.40998900  | 5.21842000  | -0.55408800 |
| C | 2.18051700  | 4.66894400  | 0.65792200  |
| H | 1.60494100  | 3.91497100  | 1.20184300  |
| H | 3.13134000  | 4.22183700  | 0.36298600  |
| H | 2.39485300  | 5.47906500  | 1.36126800  |
| C | 0.10790600  | 5.86615300  | -0.05346400 |
| H | -0.54720800 | 5.14624700  | 0.44116000  |
| H | 0.34065000  | 6.65234600  | 0.67075800  |
| H | -0.46060000 | 6.33102300  | -0.86193200 |
| C | 2.27348100  | 6.29282200  | -1.24240200 |
| H | 1.76214000  | 6.72829200  | -2.10640300 |
| H | 2.50078800  | 7.10754700  | -0.54900500 |
| H | 3.22469300  | 5.87945800  | -1.59079000 |
